# Supplementary material for: Novel Phthalic-Based Anticancer Tyrosine Kinase Inhibitors: Design, Synthesis and Biological Activity
Source: MDPI journal article supplement (doi:10.3390/cimb45030117), 2023-02-22

<sup>1</sup>H, <sup>13</sup>C and <sup>19</sup>F NMR spectra of compound 5 (DMSO-d<sub>6</sub>),  
**N1-(3-(4-methyl-1H-imidazol-1-yl)-5-(trifluoromethyl)phenyl)-N3-(3-(trifluoromethyl)phenyl)-  
isophthalamide**

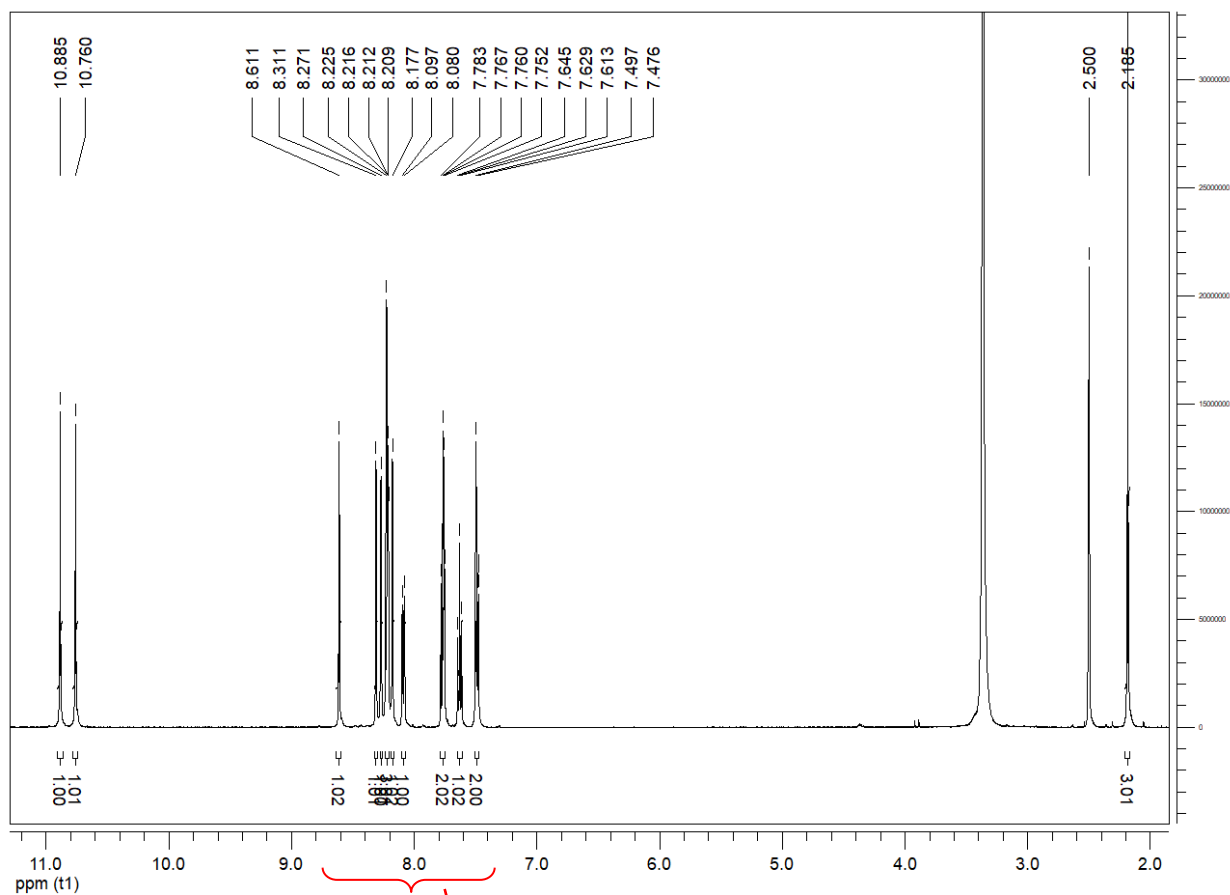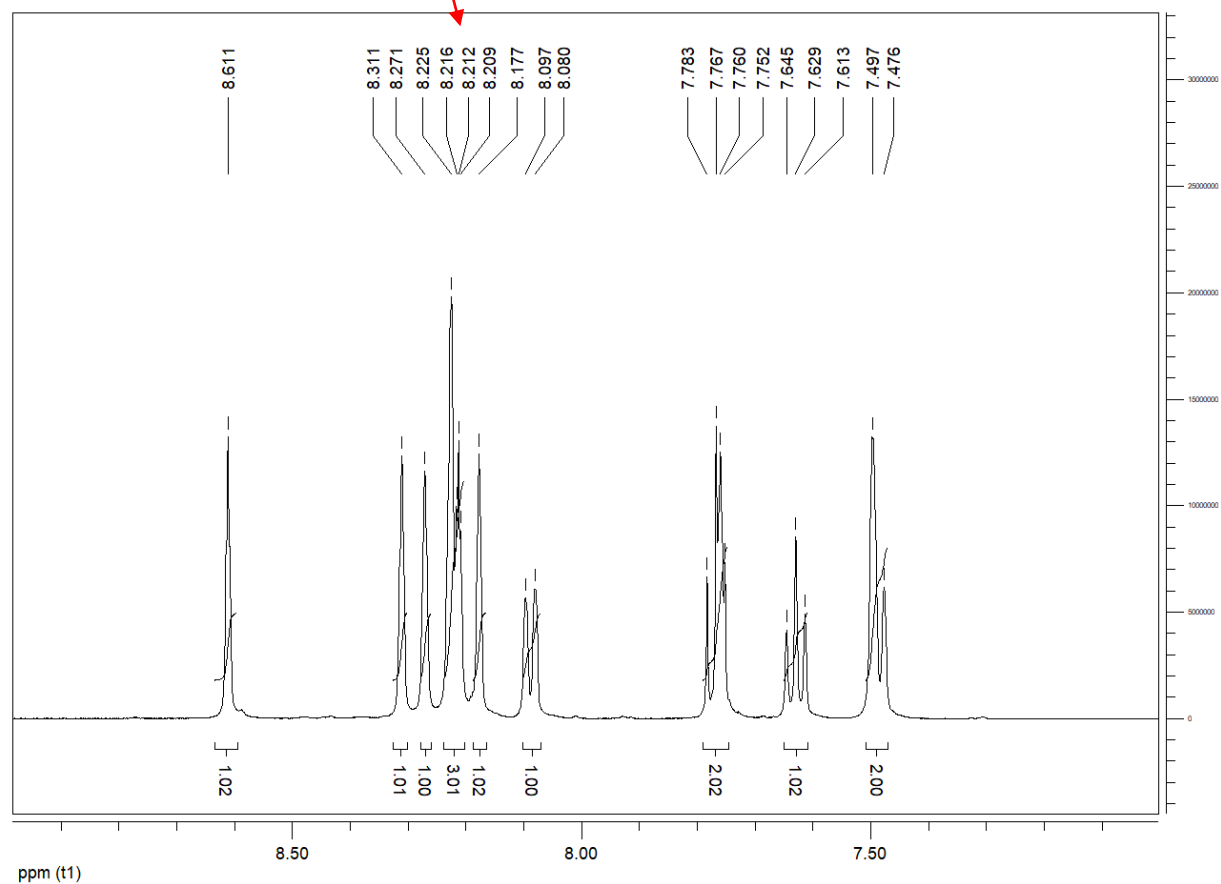

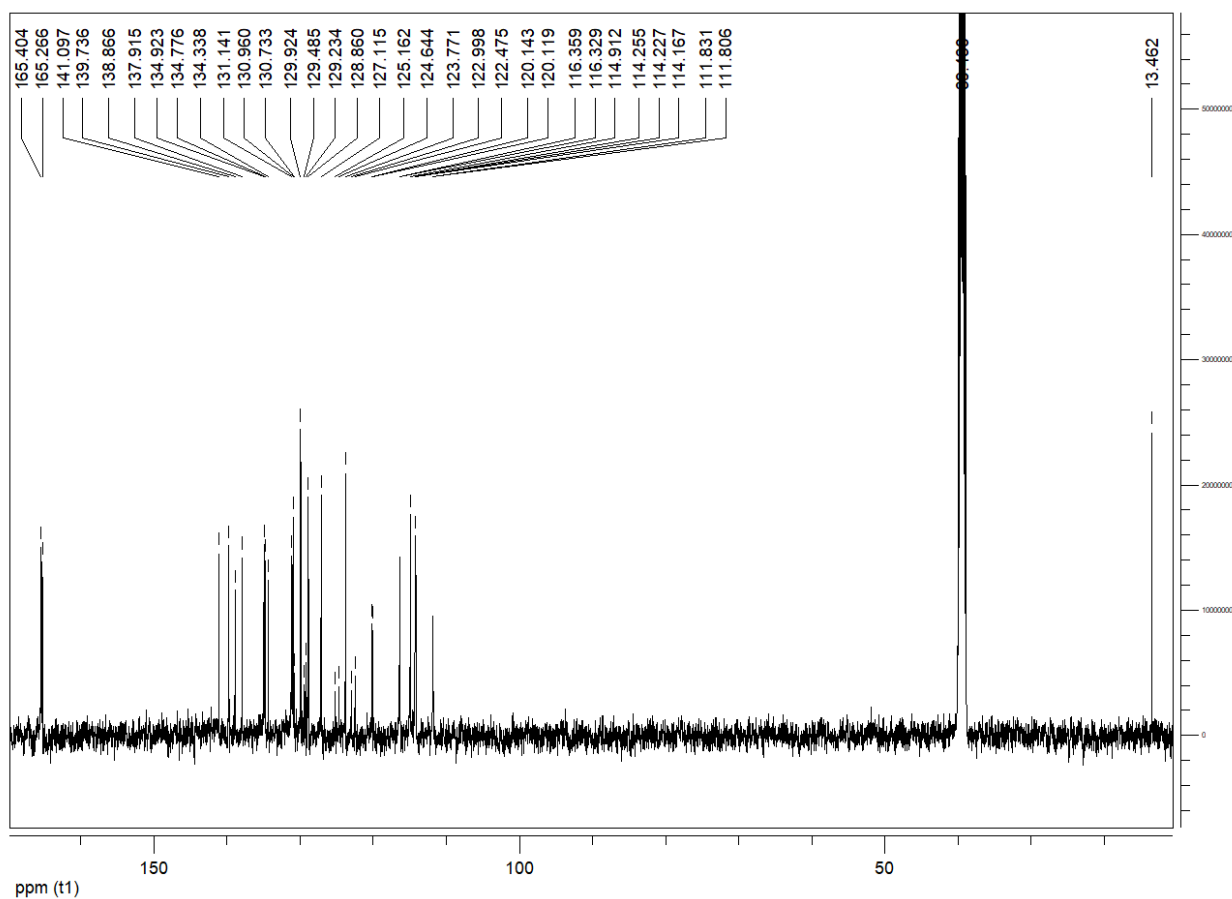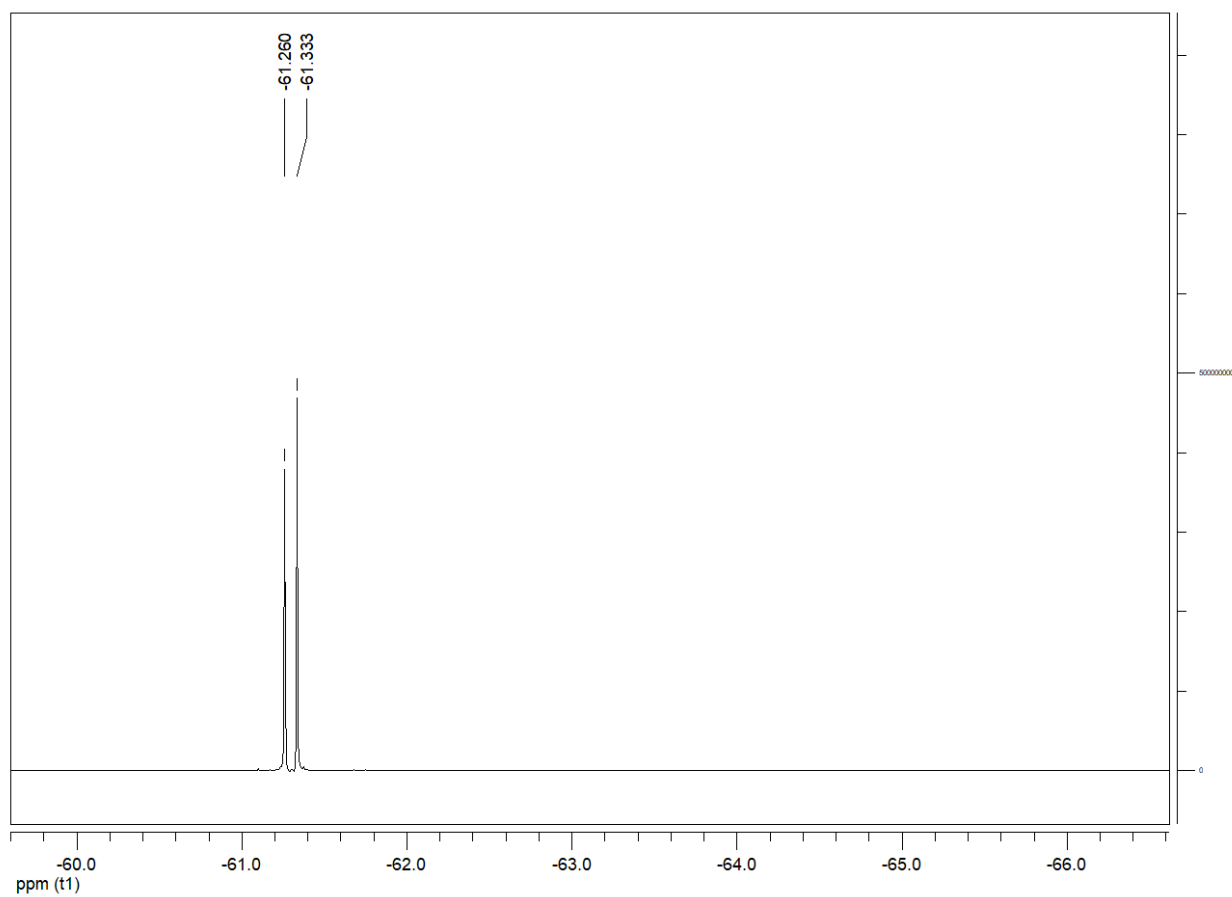

<sup>1</sup>H, <sup>13</sup>C and <sup>19</sup>F NMR spectra of compound 6 (DMSO-d<sub>6</sub>),  
**N1-(4-((2-(methylcarbamoyl)pyridin-4-yl)oxy)phenyl)-N3-(3-(trifluoromethyl)phenyl)isophthalamide**

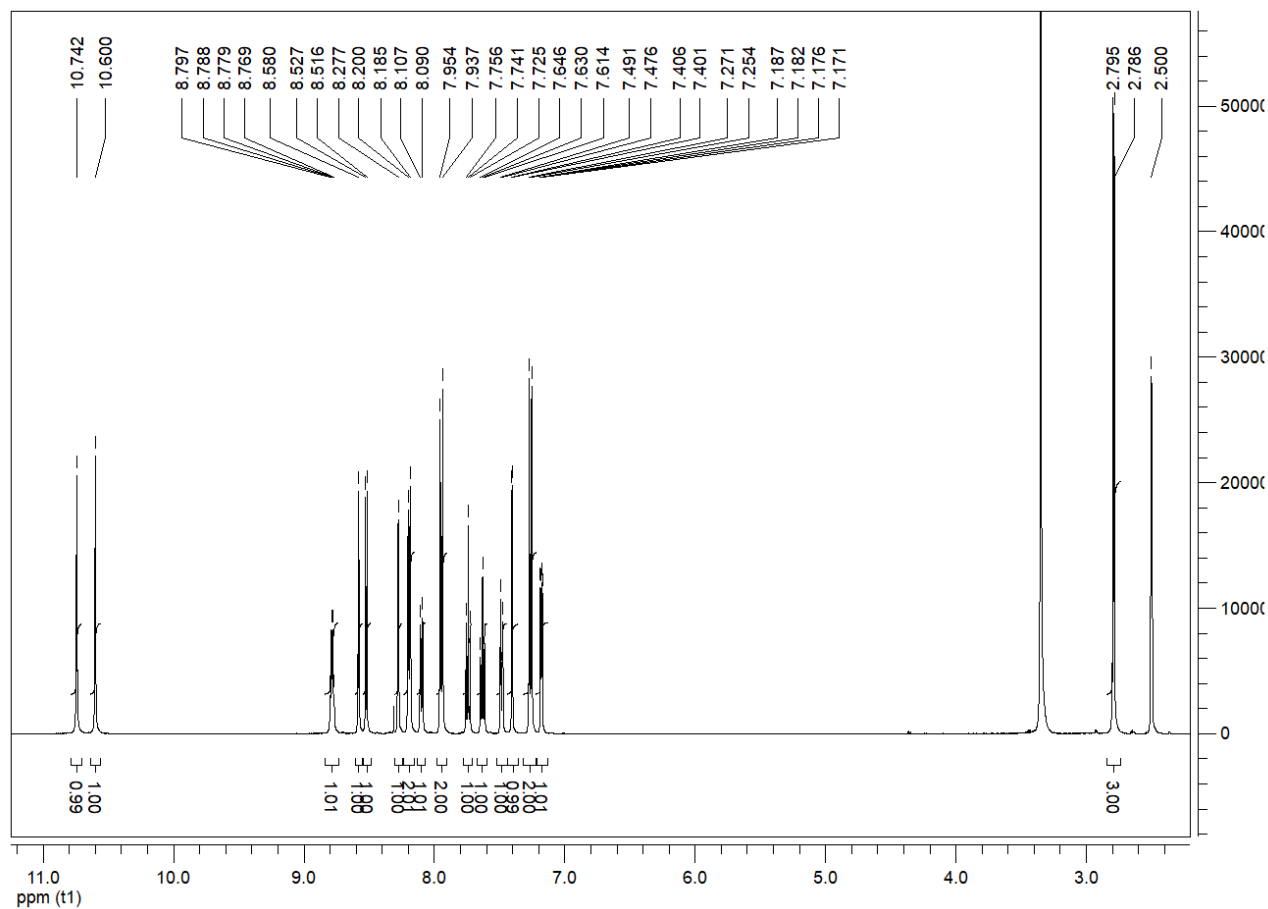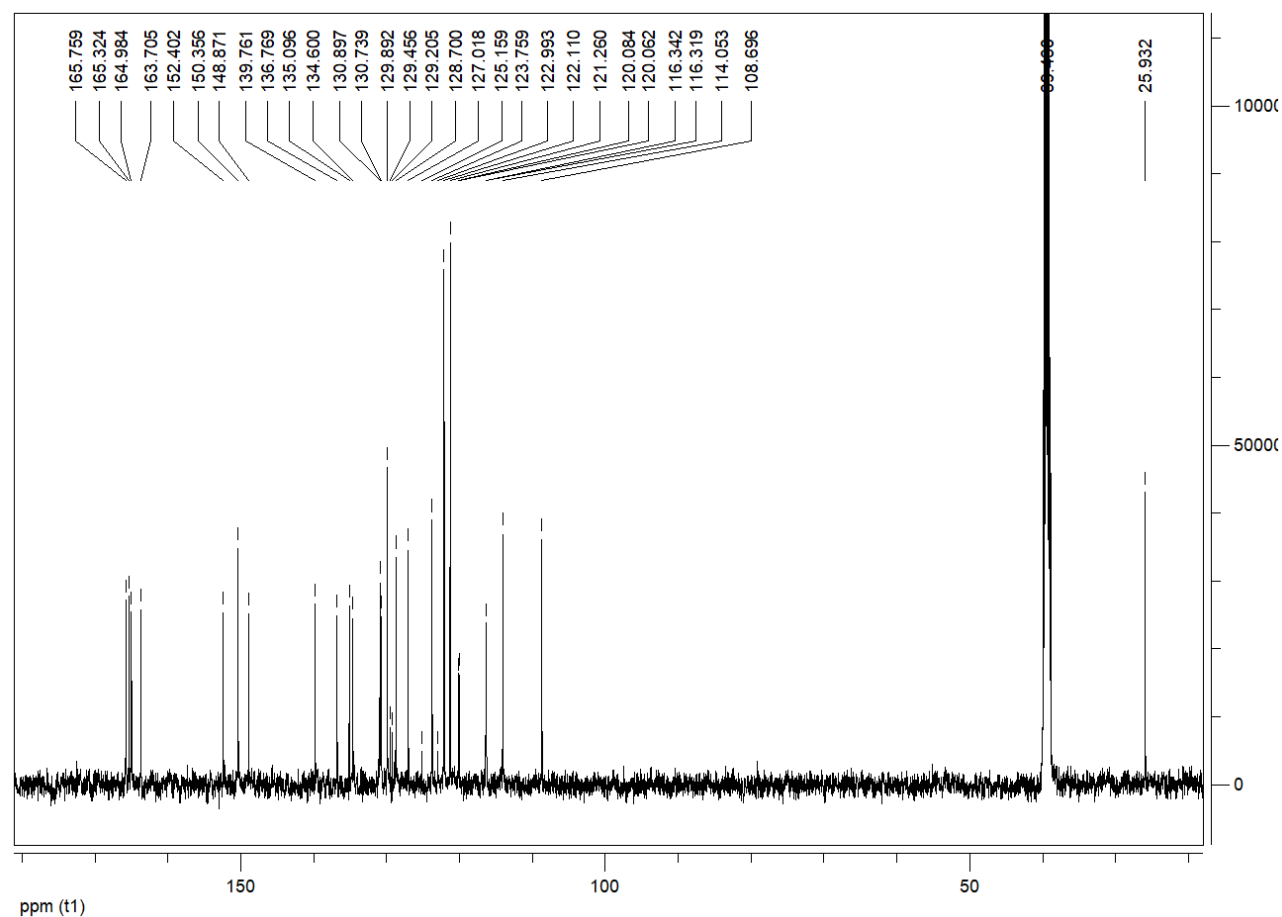

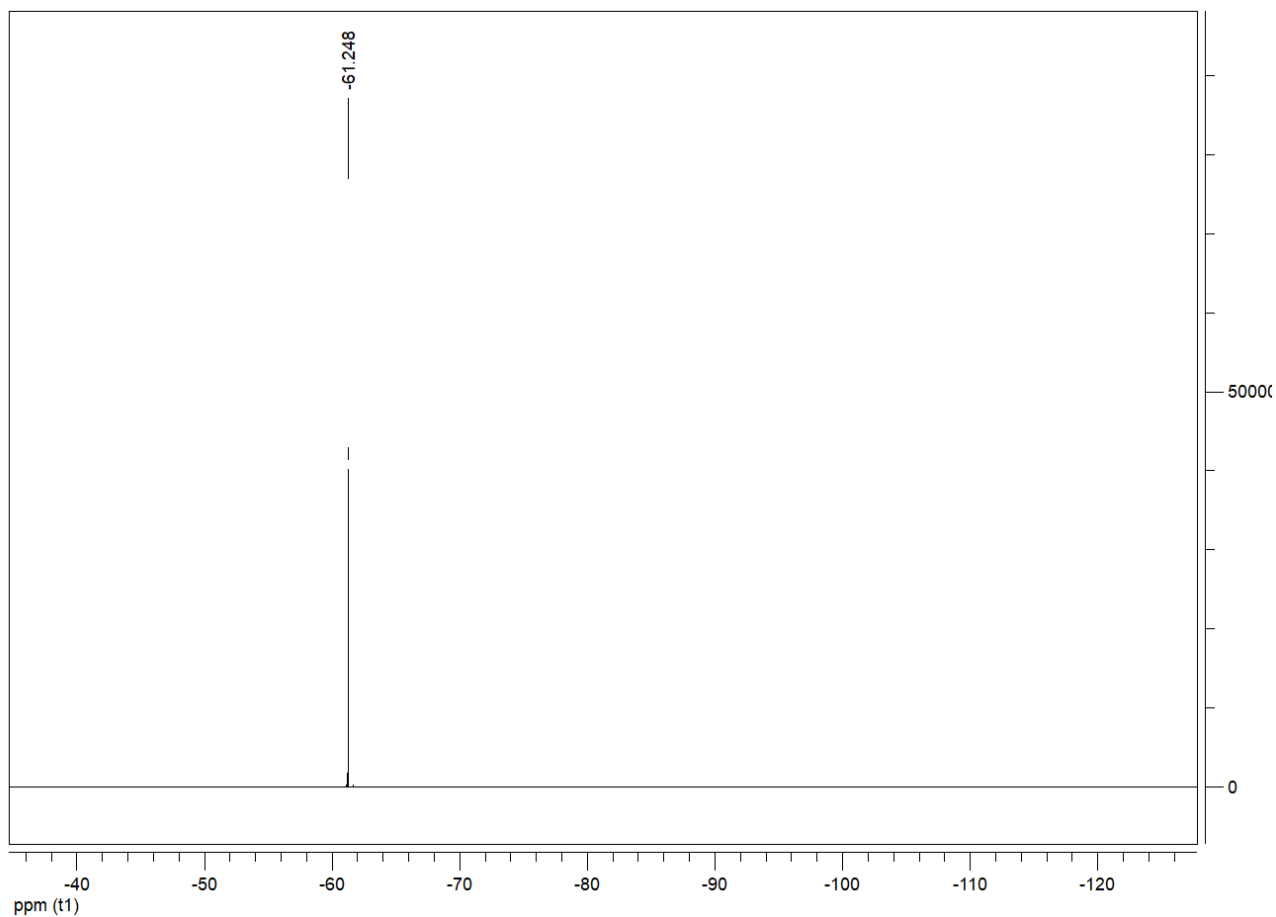

<sup>1</sup>H, <sup>13</sup>C and <sup>19</sup>F NMR spectra of compound 7 (DMSO-d<sub>6</sub>),  
**3-(4-(4-Methoxybenzoyl)piperazine-1-carbonyl)-N-(3-(trifluoromethyl)phenyl)benzamide**

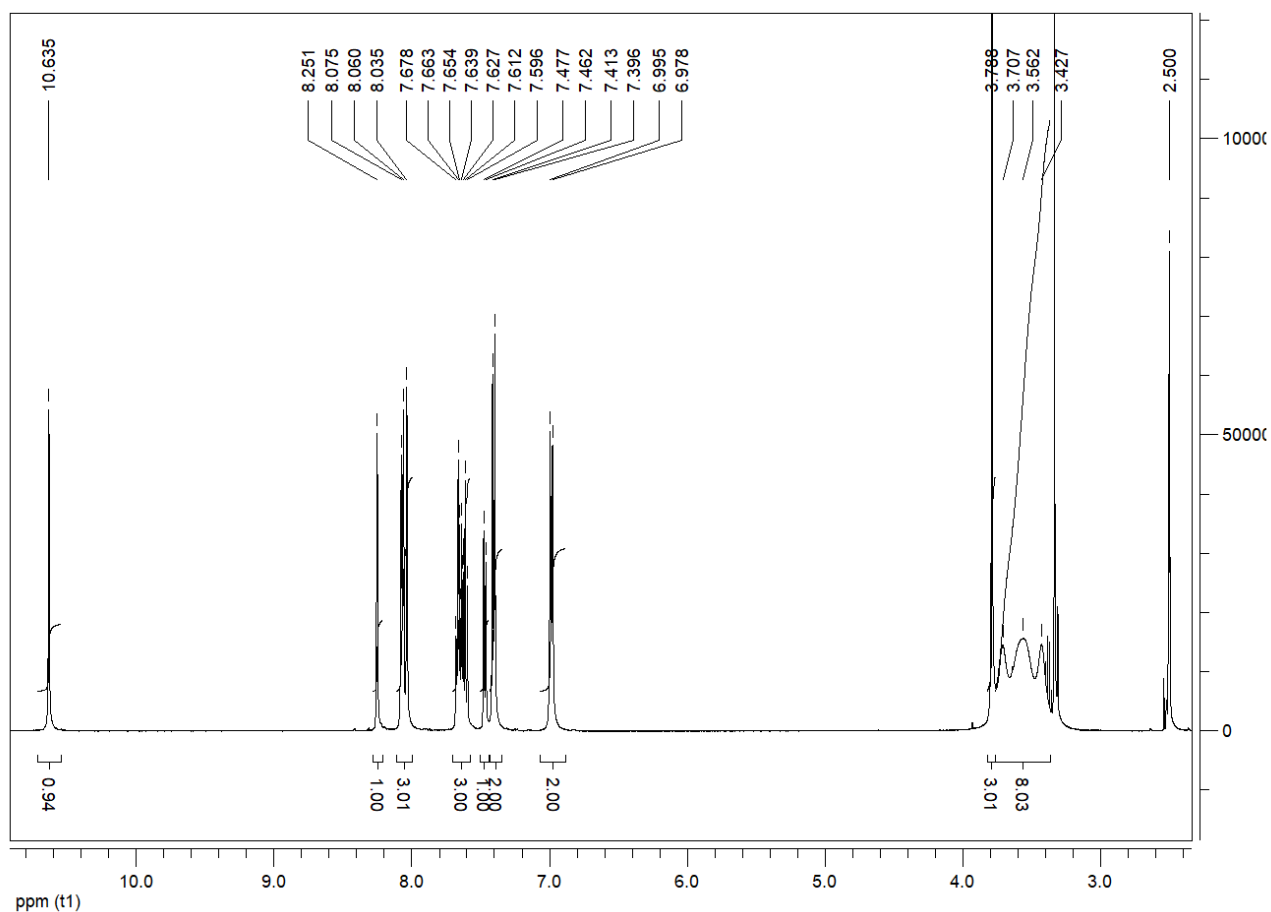

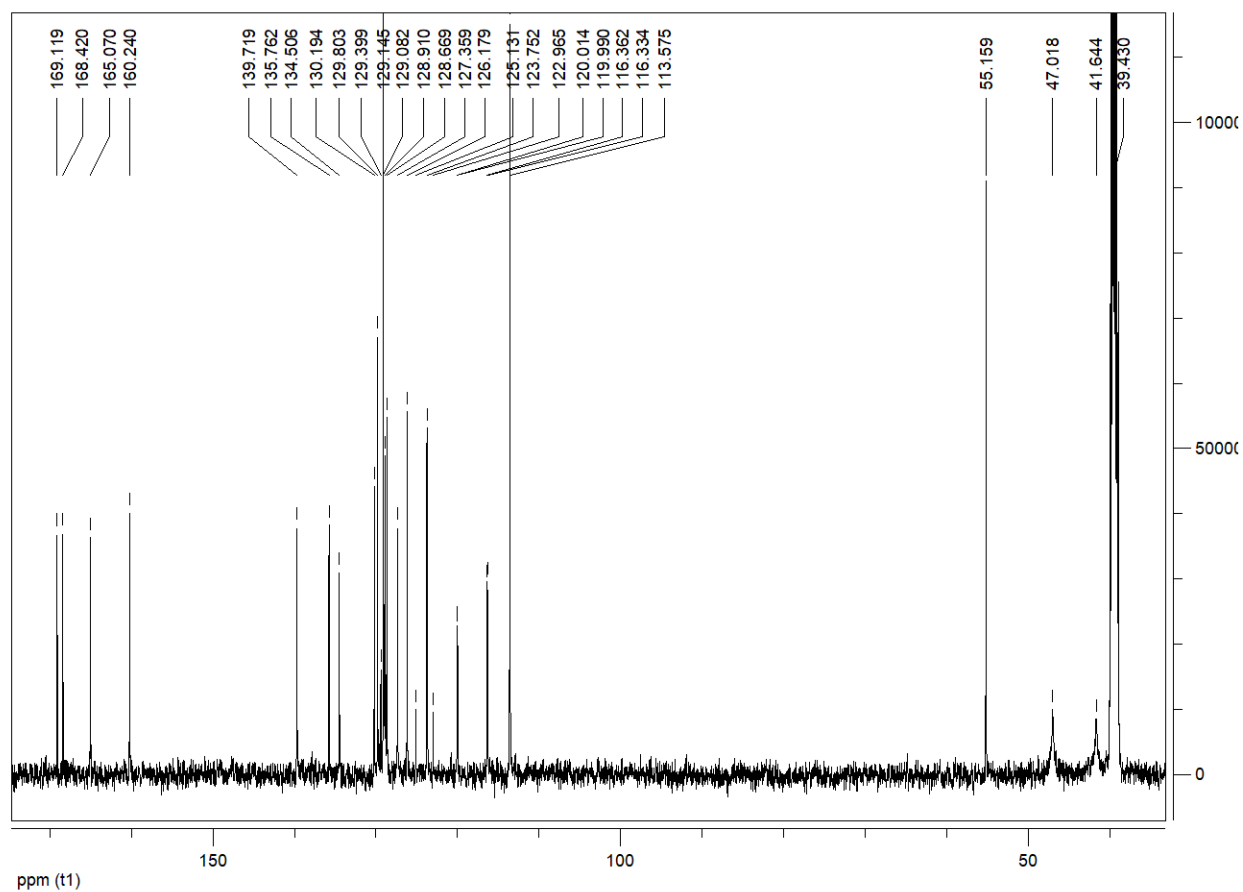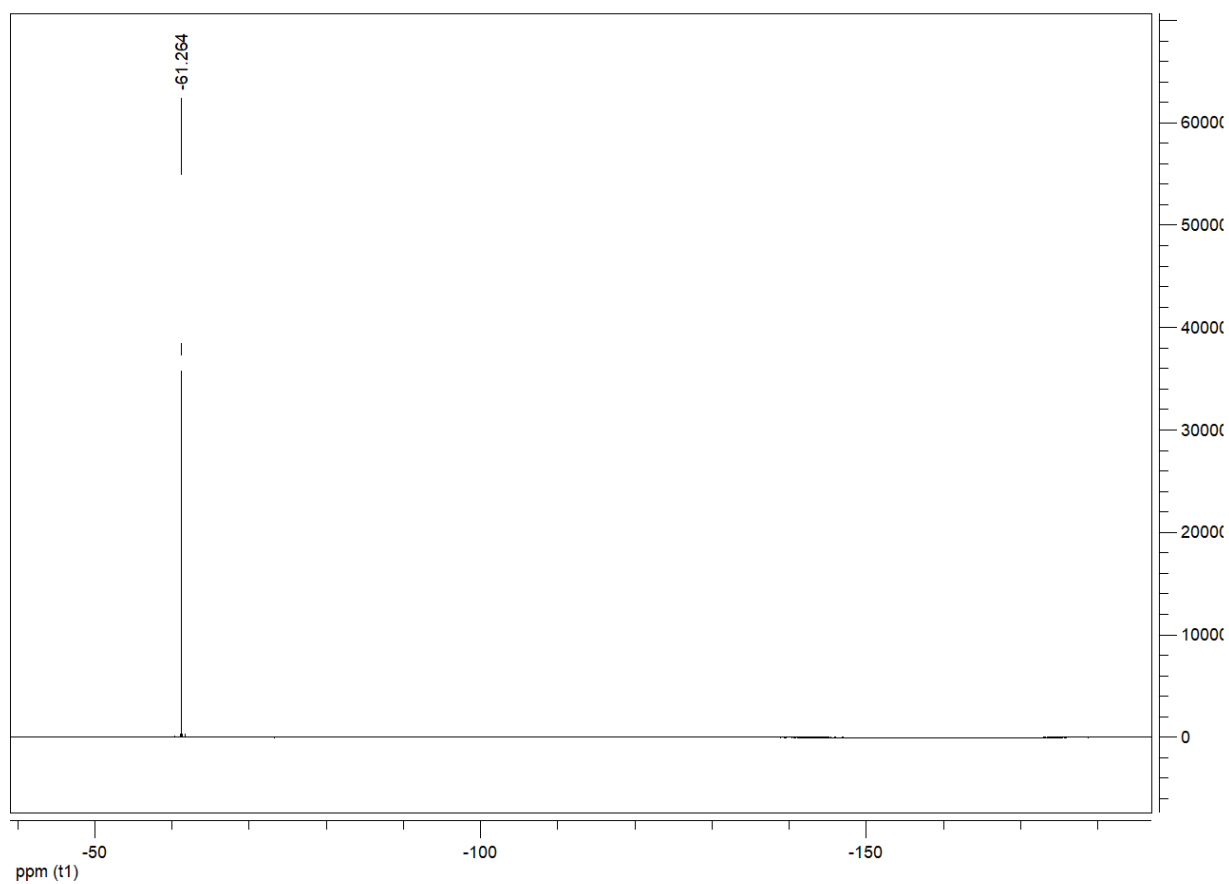

<sup>1</sup>H, <sup>13</sup>C and <sup>19</sup>F NMR spectra of compound 8 (DMSO-d<sub>6</sub>),  
**3-(4-(2-Fluorobenzoyl)piperazine-1-carbonyl)-N-(3-(trifluoromethyl)phenyl)benzamide**

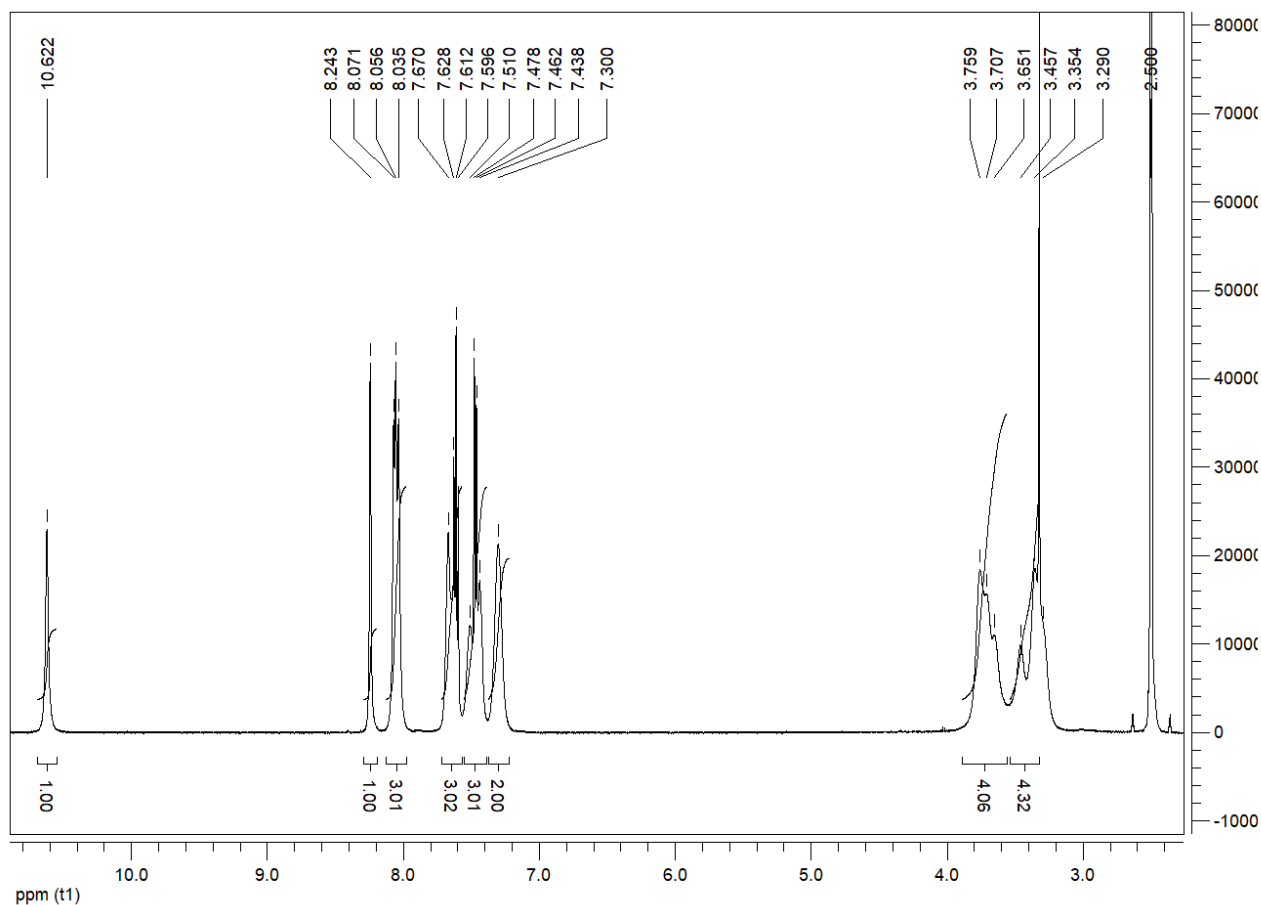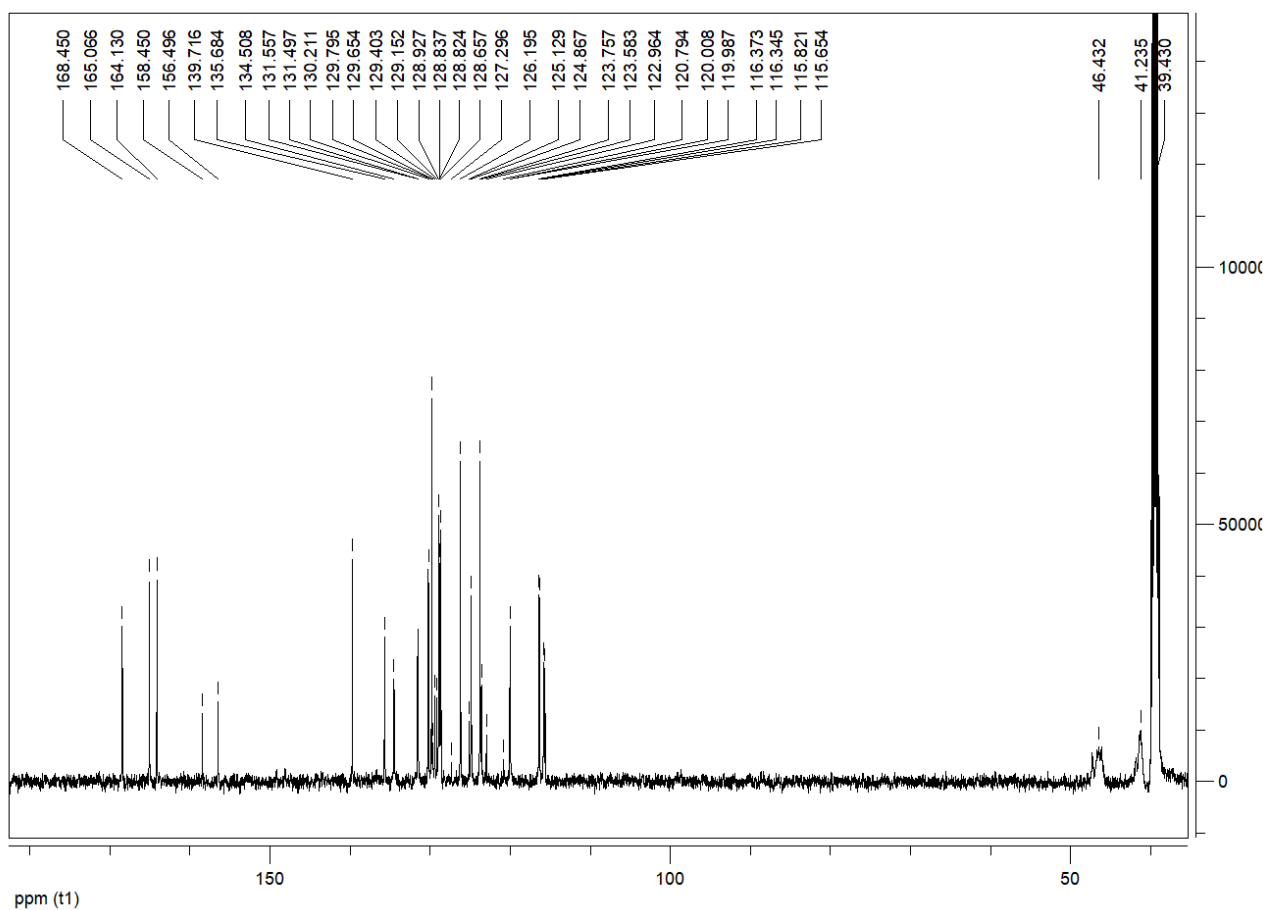

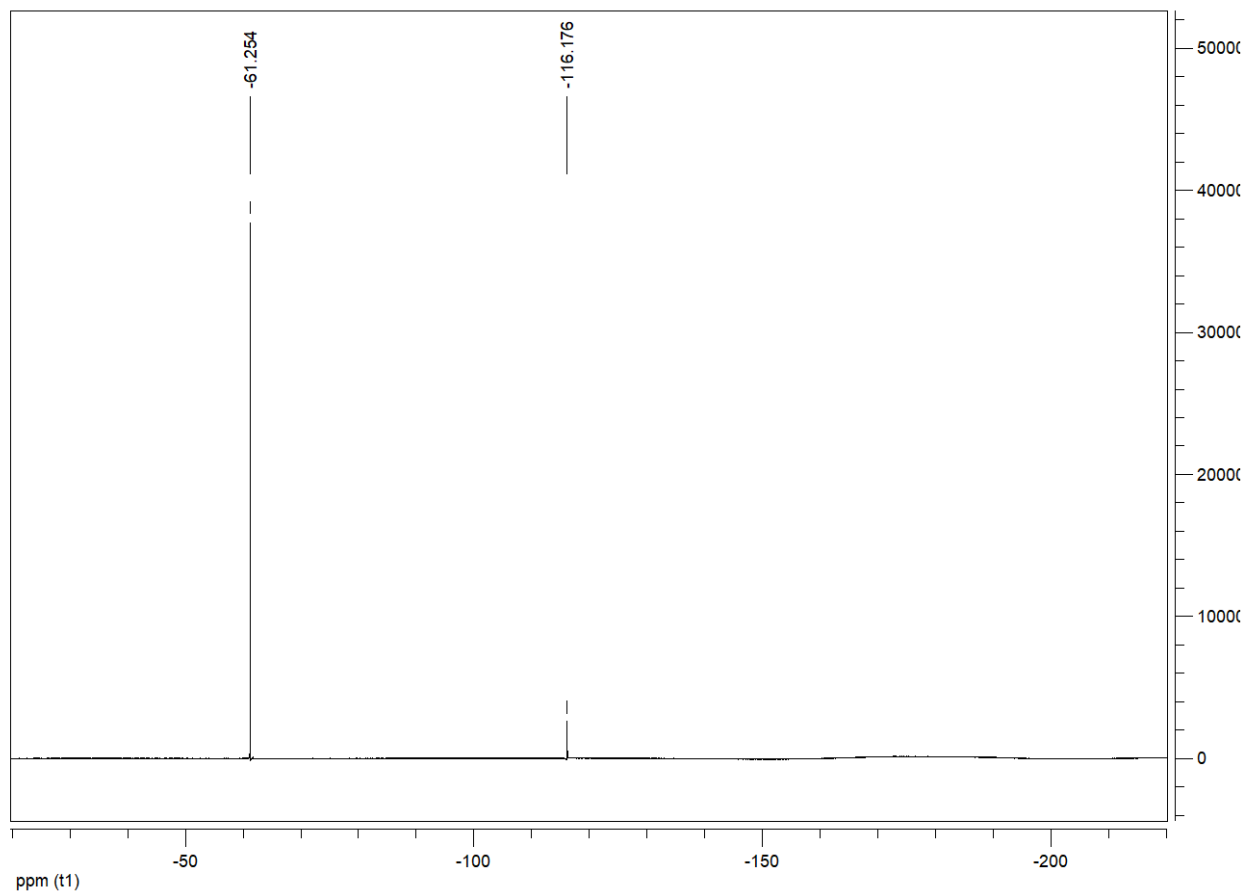

<sup>1</sup>H, <sup>13</sup>C and <sup>19</sup>F NMR spectra of compound **9** (DMSO-d<sub>6</sub>),  
**3-(4-(3-Fluorobenzoyl)piperazine-1-carbonyl)-N-(3-(trifluoromethyl)phenyl)benzamide**

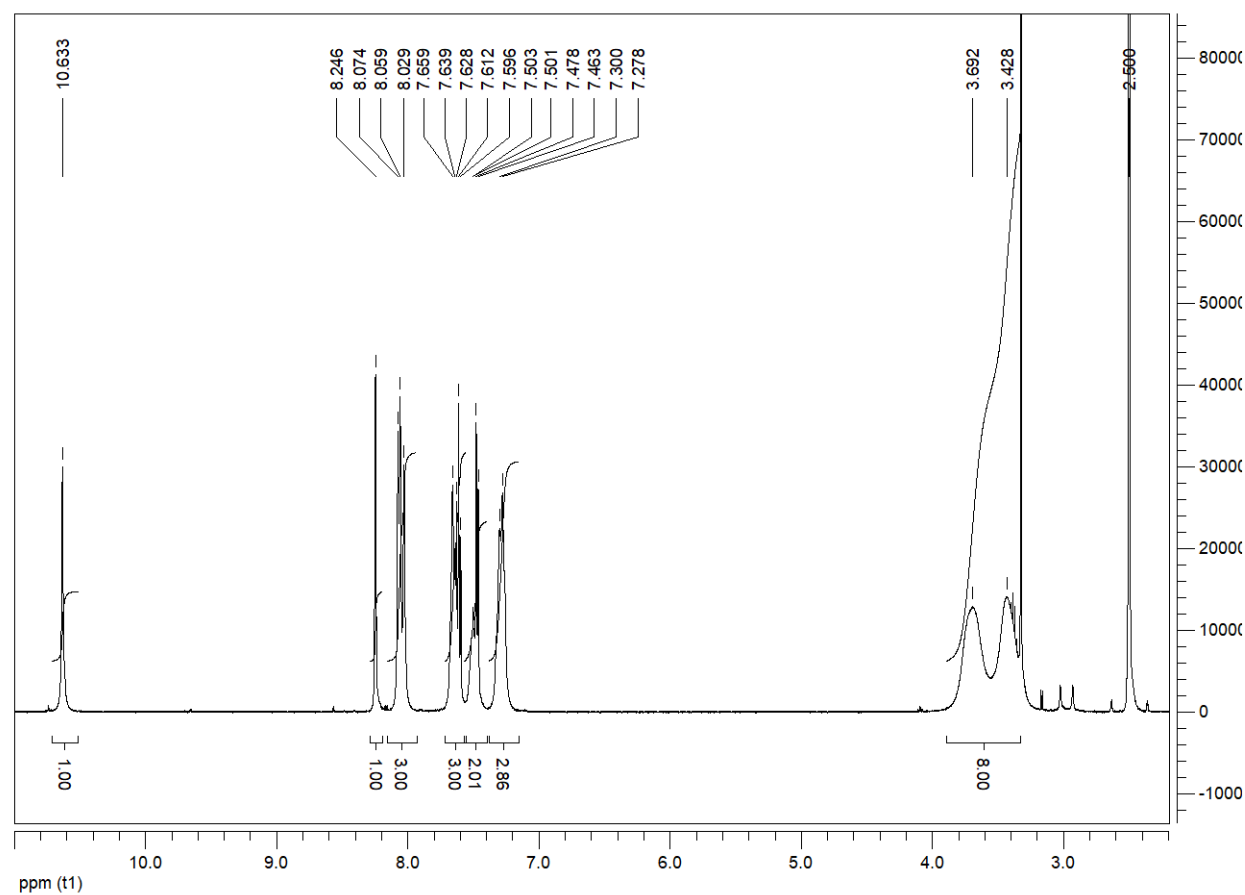

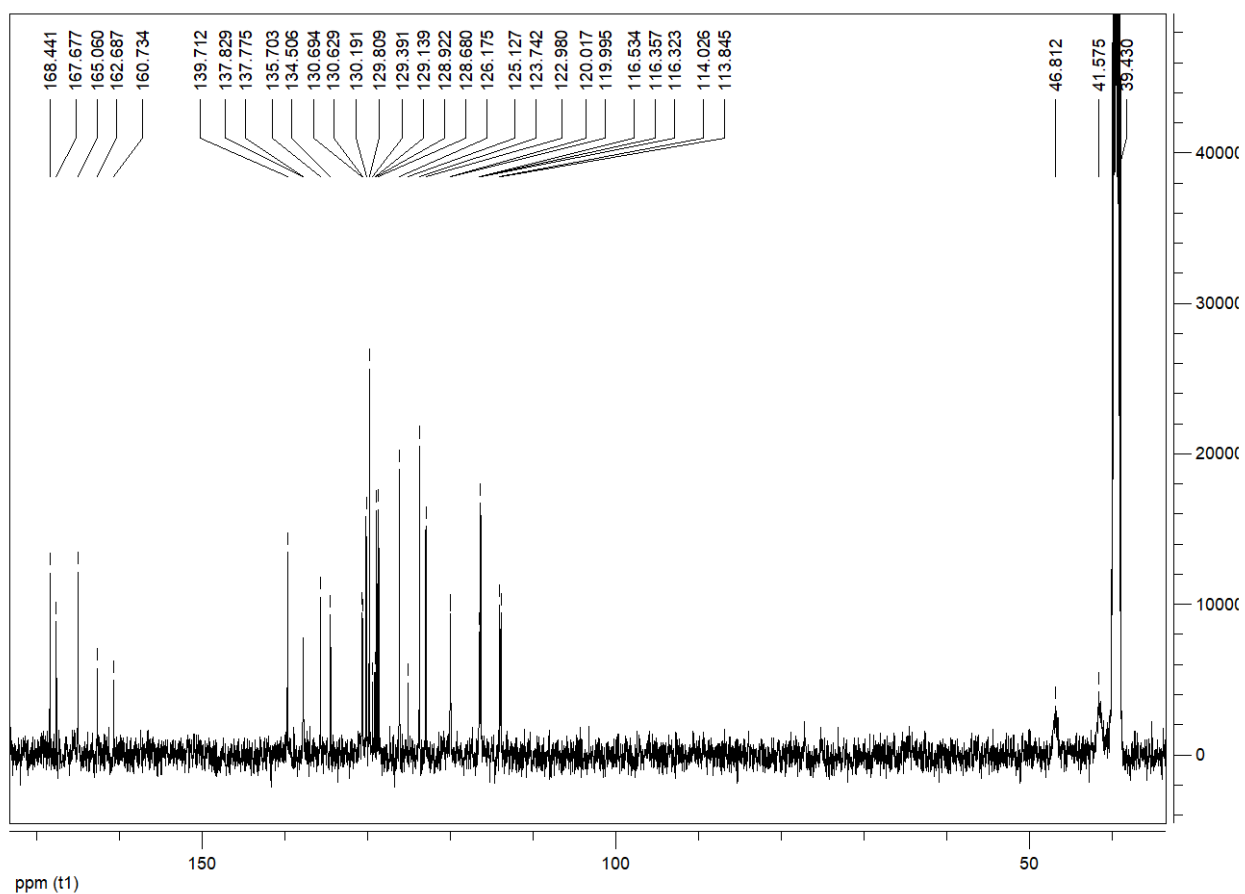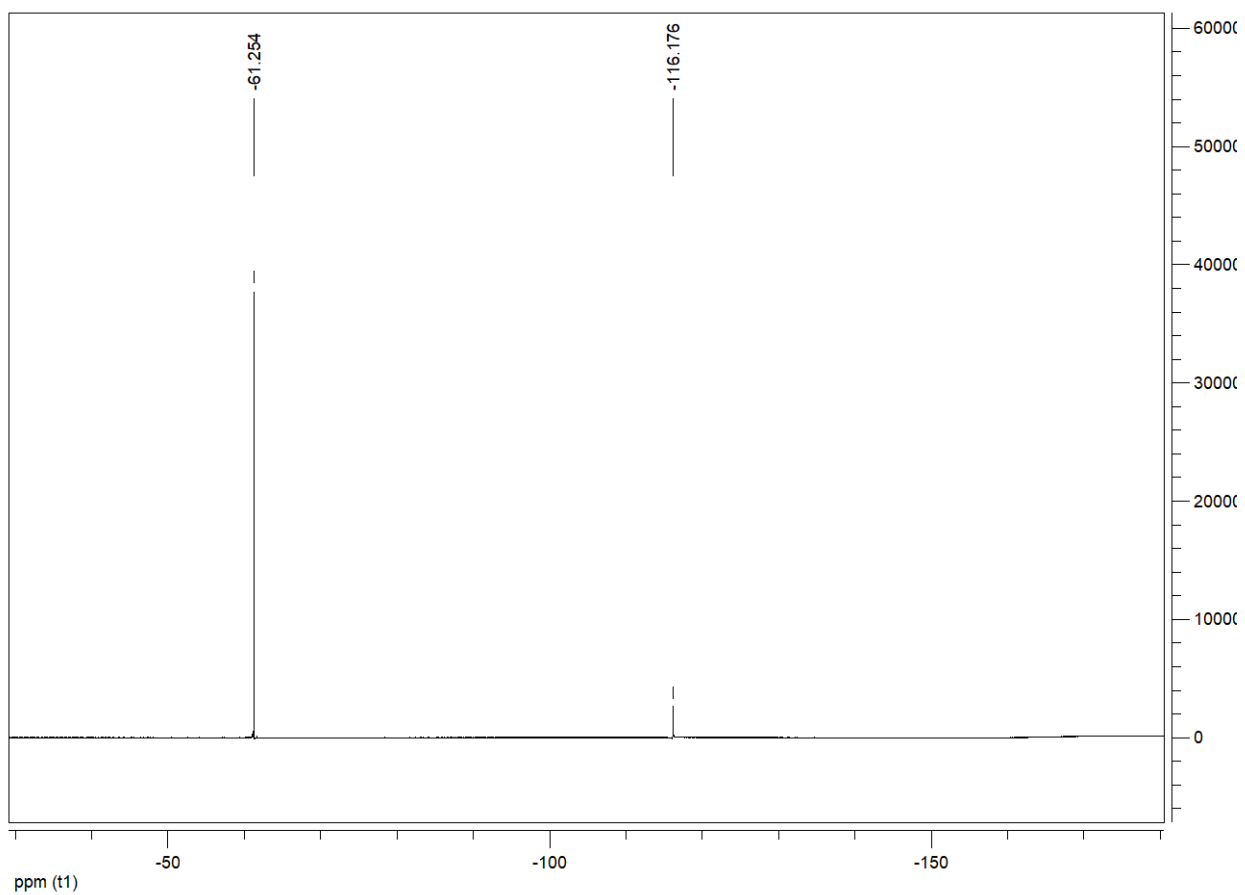



<sup>1</sup>H and <sup>13</sup>C NMR spectra of compound **10** (DMSO-d<sub>6</sub>),  
**N1,N3-bis(3-(4-methyl-1H-imidazol-1-yl)-5-(trifluoromethyl)phenyl)isophthalamide**

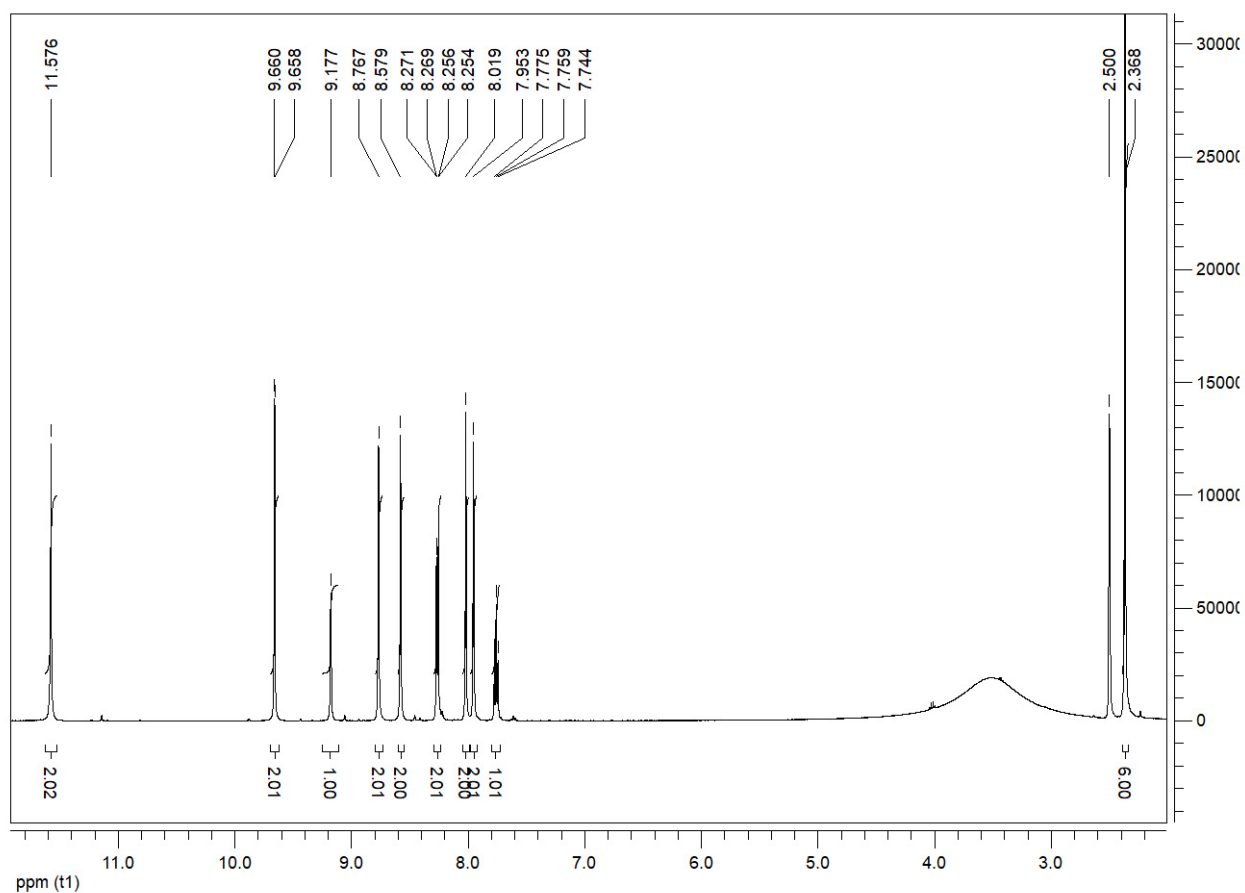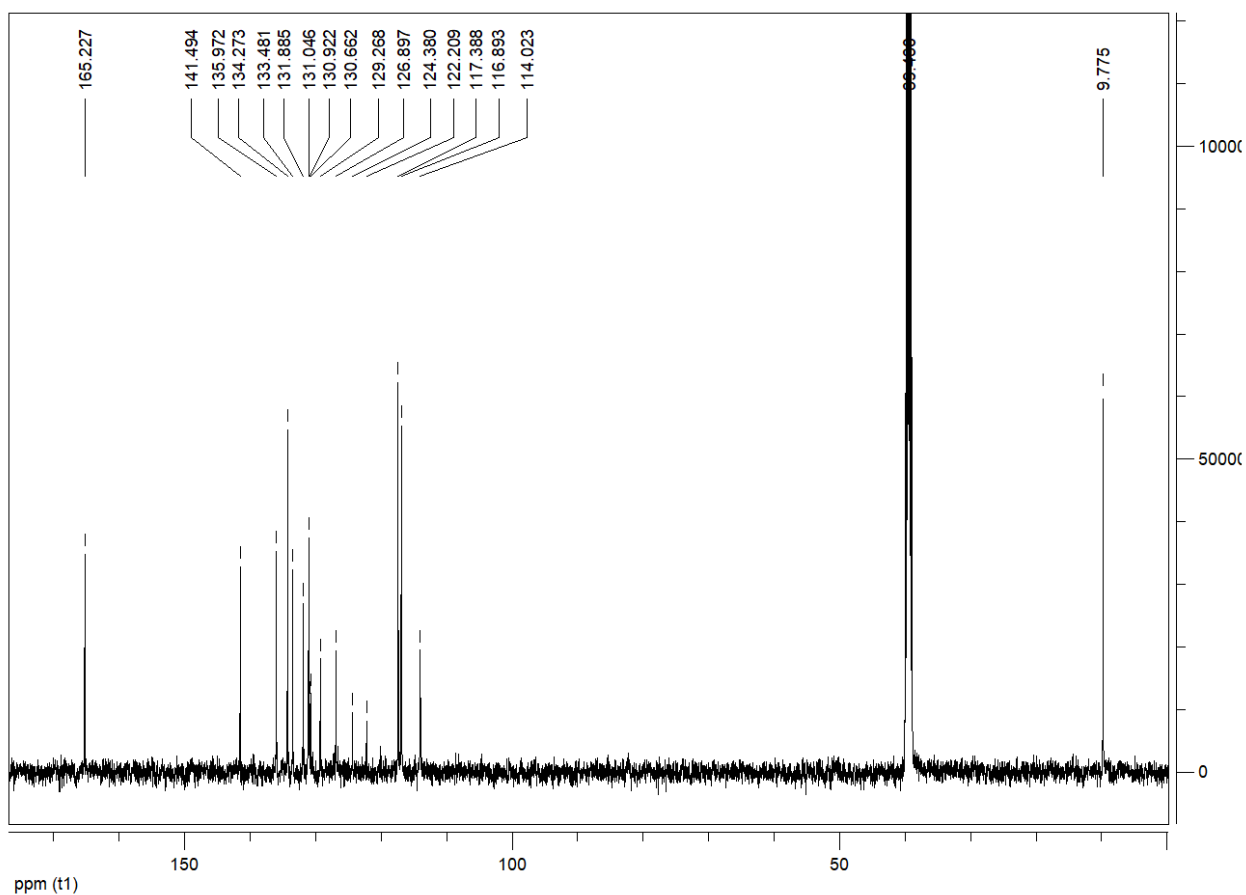

$^1\text{H}$ ,  $^{13}\text{C}$  and  $^{19}\text{F}$  NMR spectra of compound **11** (DMSO- $d_6$ ),  
**N1-(3-(4-methyl-1H-imidazol-1-yl)-5-(trifluoromethyl)phenyl)-N3-(4-((2-(methylcarbamoyl)pyridin-4-yl)oxy)phenyl)isophthalamide**

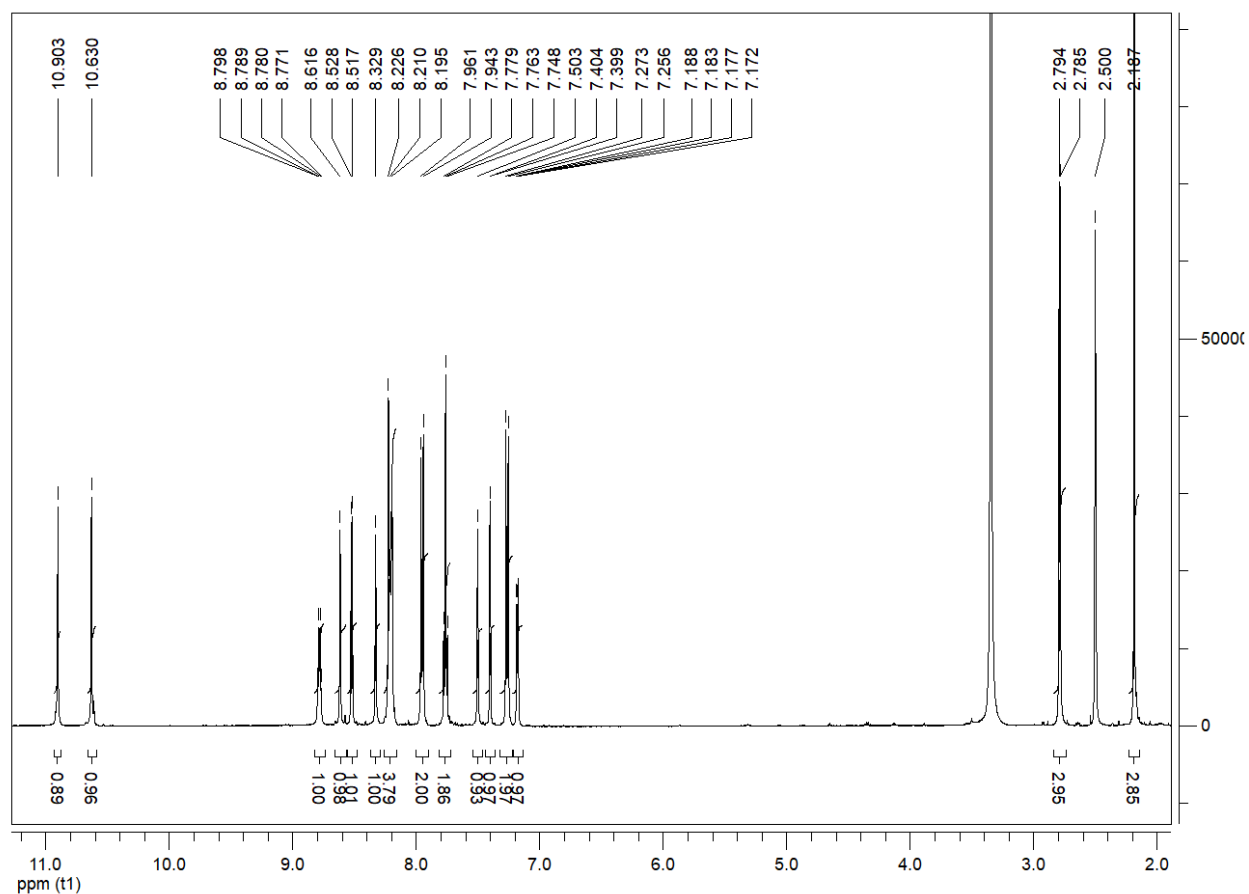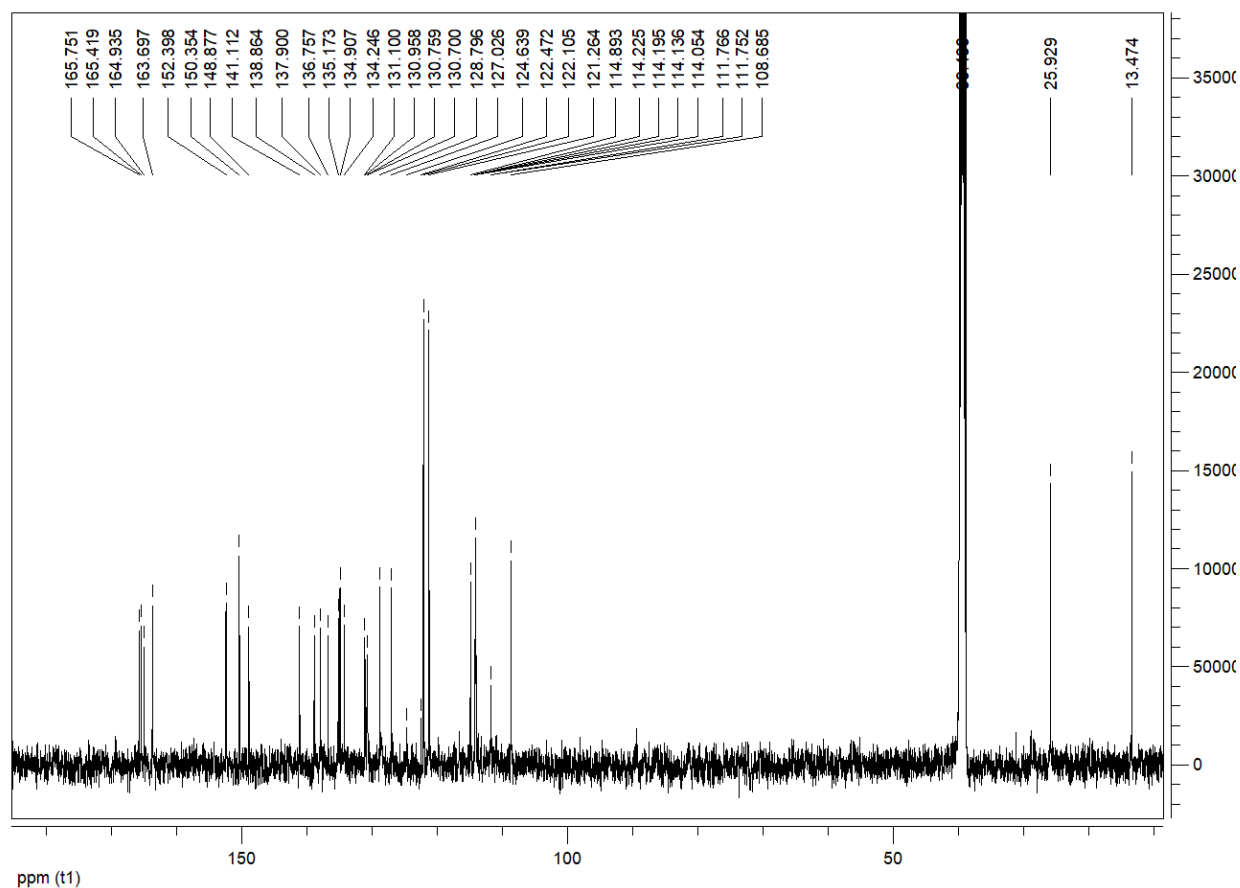

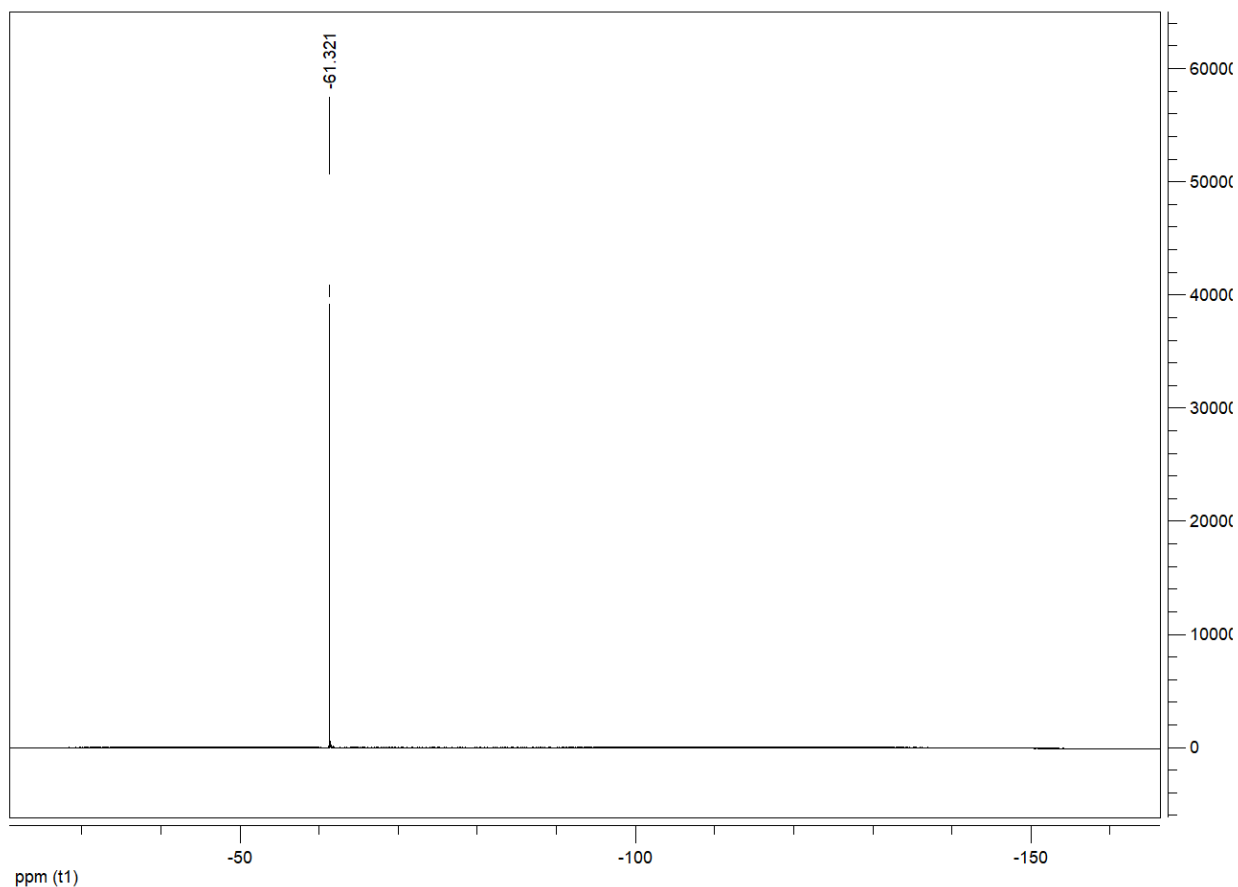

<sup>1</sup>H, <sup>13</sup>C and <sup>19</sup>F NMR spectra of compound **12** (DMSO-d<sub>6</sub>),  
**N1-(3-(4-methyl-1H-imidazol-1-yl)-5-(trifluoromethyl)phenyl)-N3-(2-methyl-5-nitrophenyl)-isophthalamide**

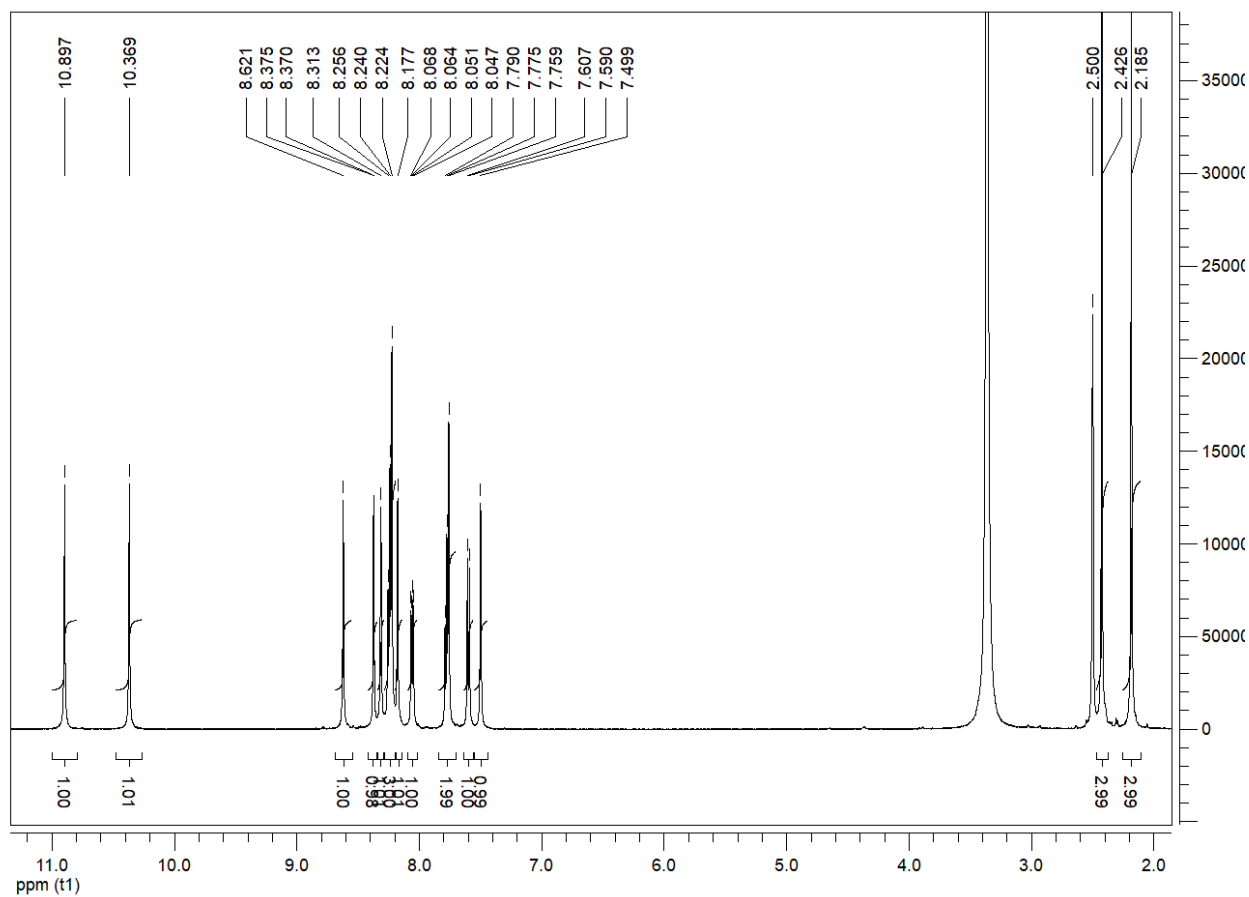

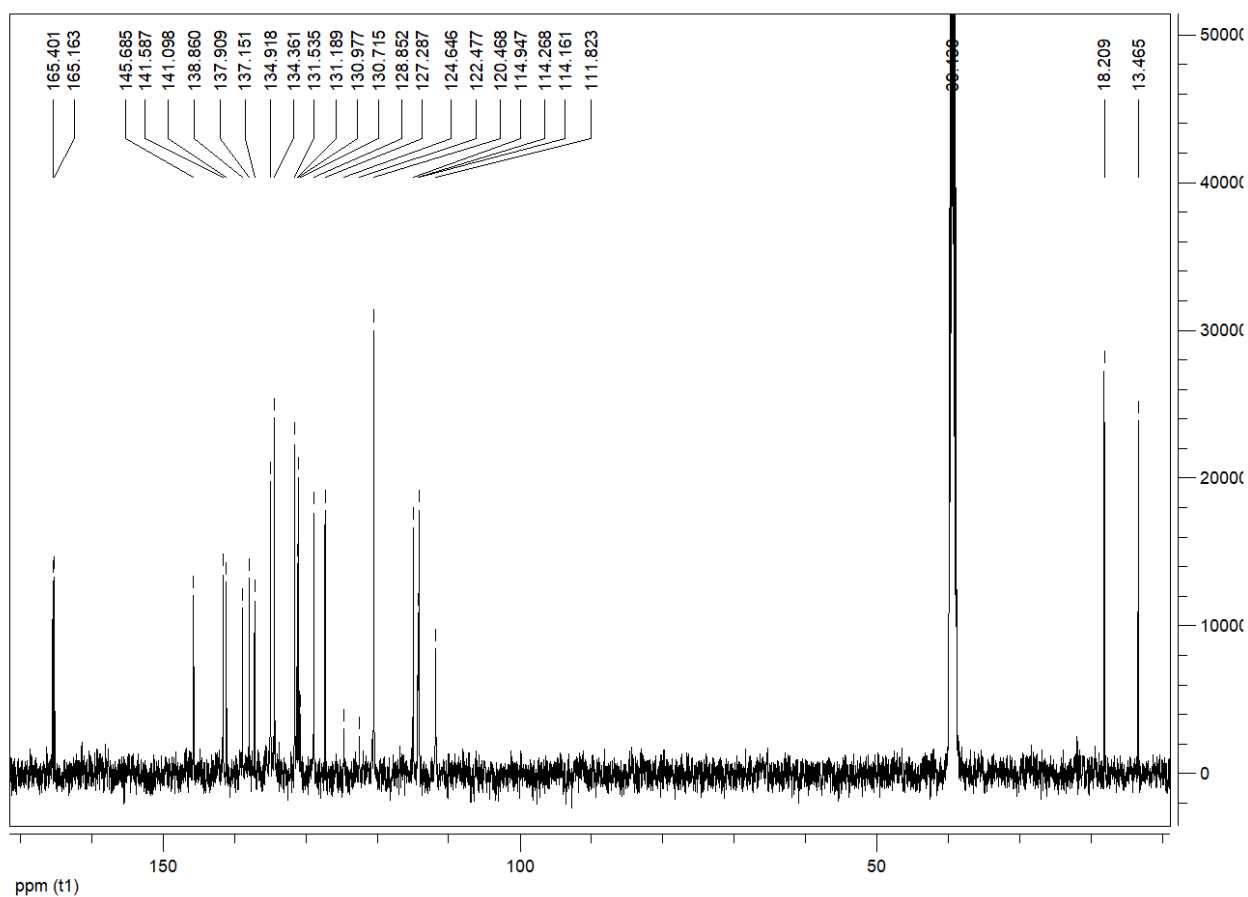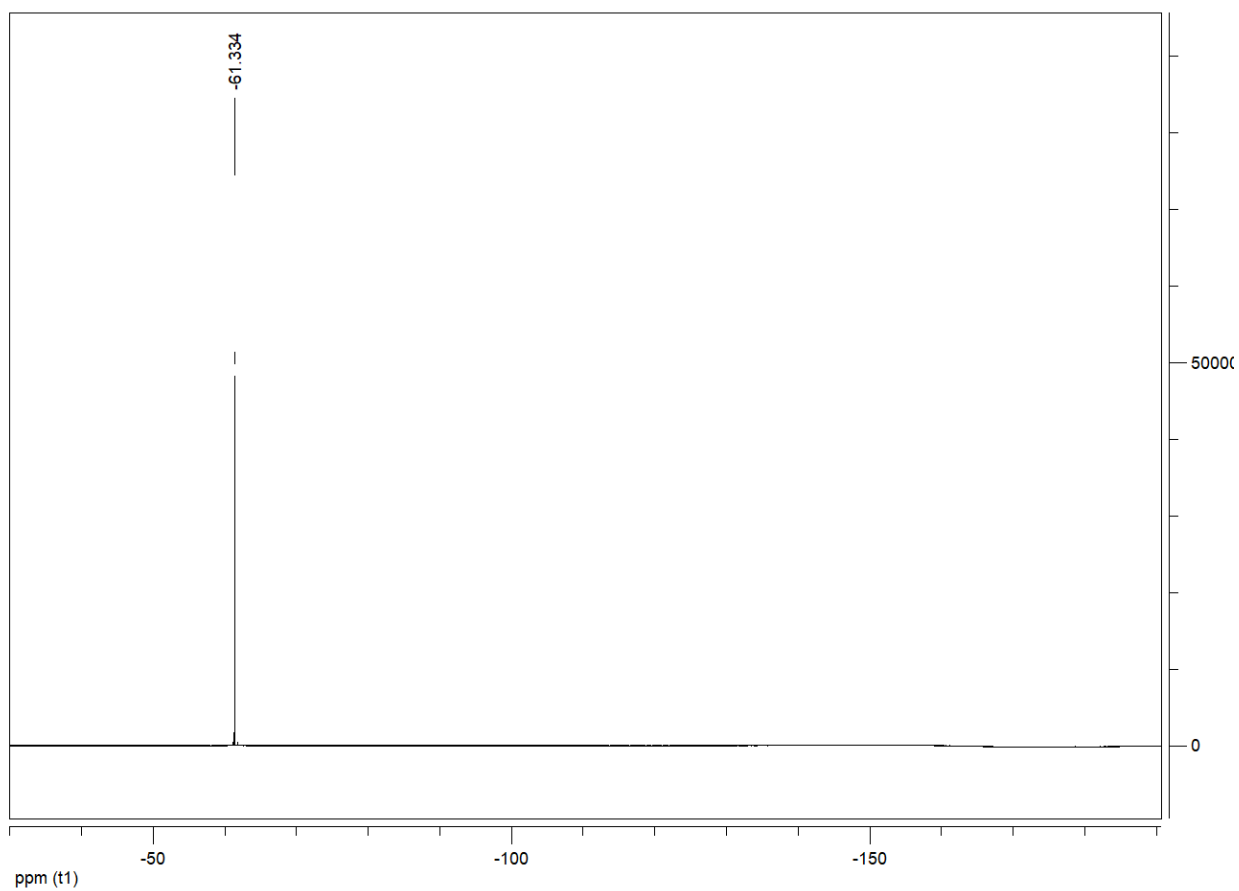

<sup>1</sup>H and <sup>13</sup>C NMR spectra of compound **13** (DMSO-d<sub>6</sub>),  
**3-(4-(4-Methoxybenzoyl)piperazine-1-carbonyl)-N-(3-(4-methyl-1H-imidazol-1-yl)-5-(trifluoromethyl)phenyl)benzamide**

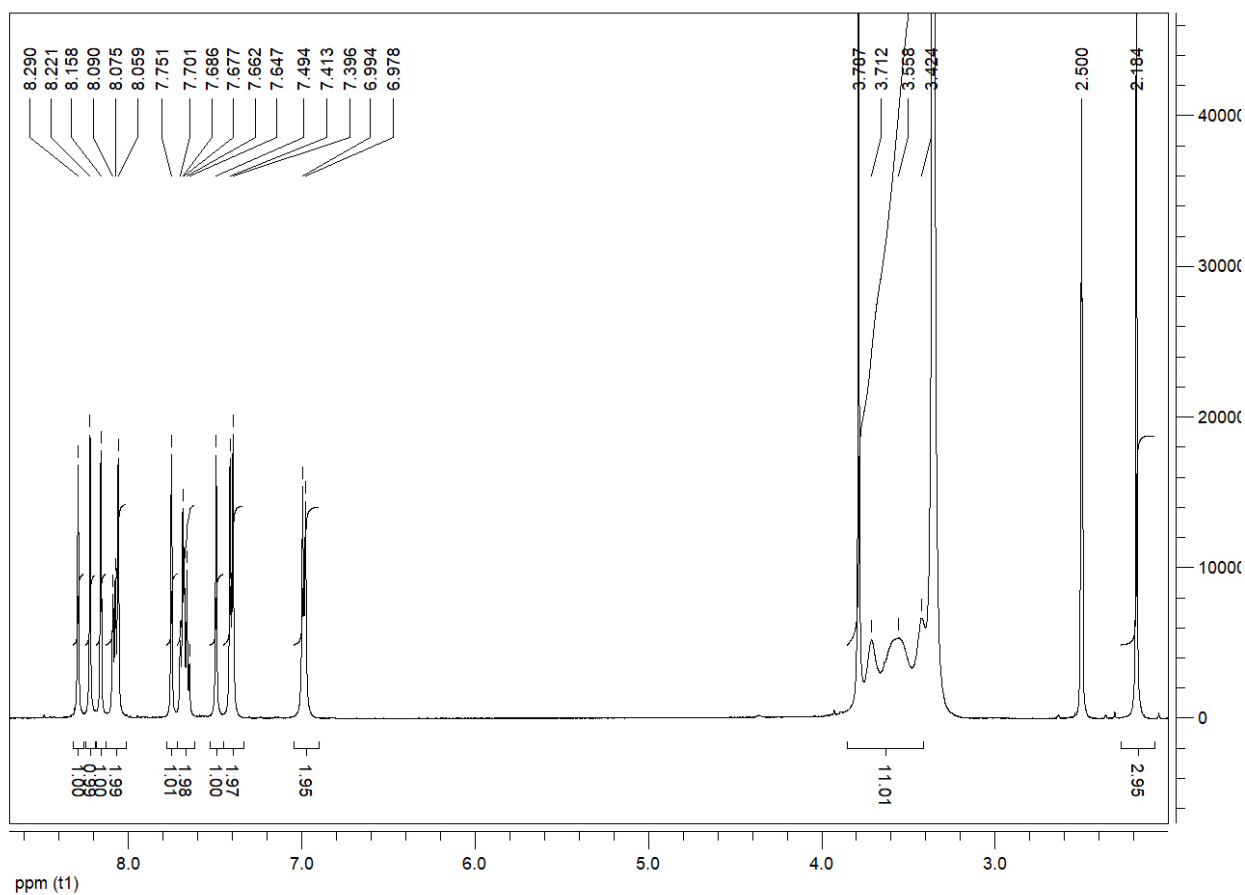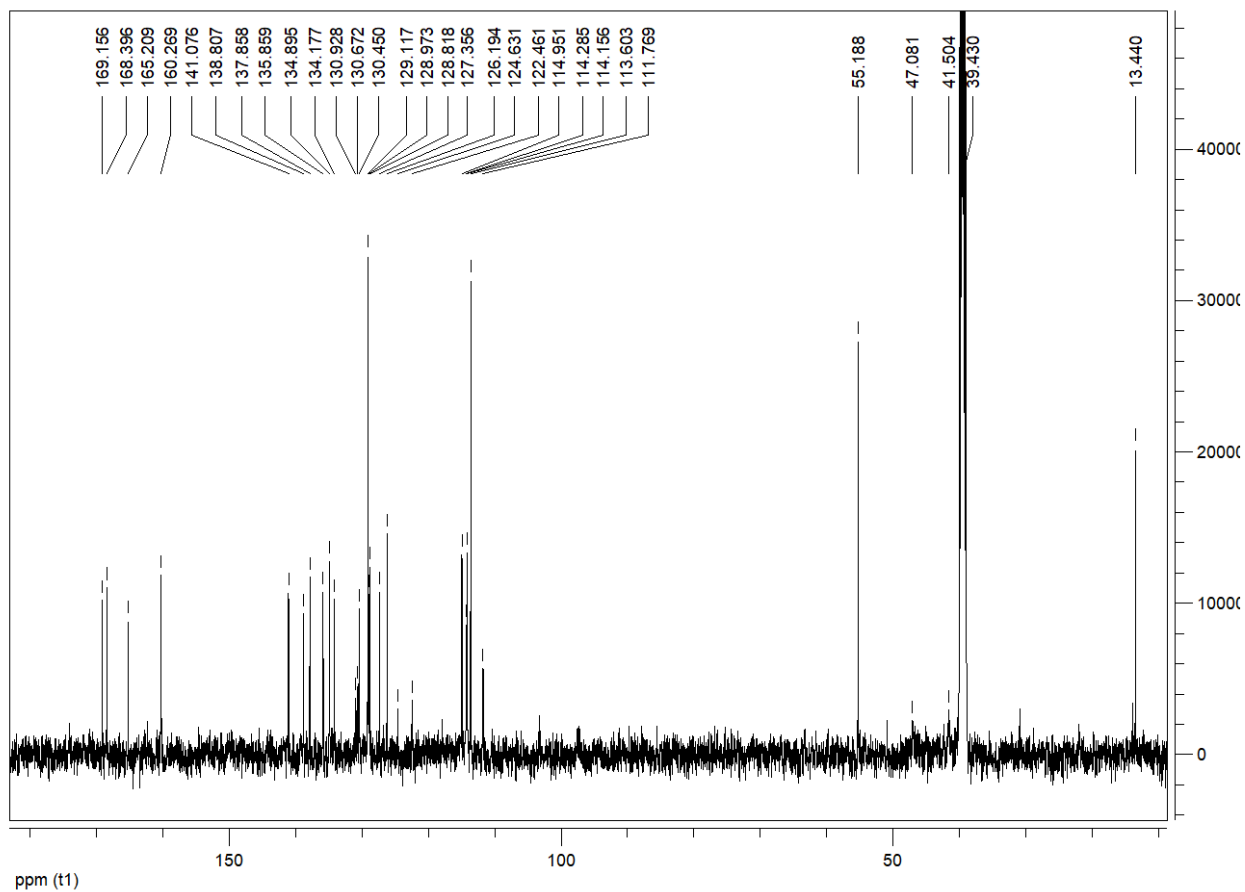

<sup>1</sup>H, <sup>13</sup>C and <sup>19</sup>F NMR spectra of compound **14** (DMSO-d<sub>6</sub>),  
**3-(4-(2-Fluorobenzoyl)piperazine-1-carbonyl)-N-(3-(4-methyl-1H-imidazol-1-yl)-5-(trifluoromethyl)phenyl)benzamide**

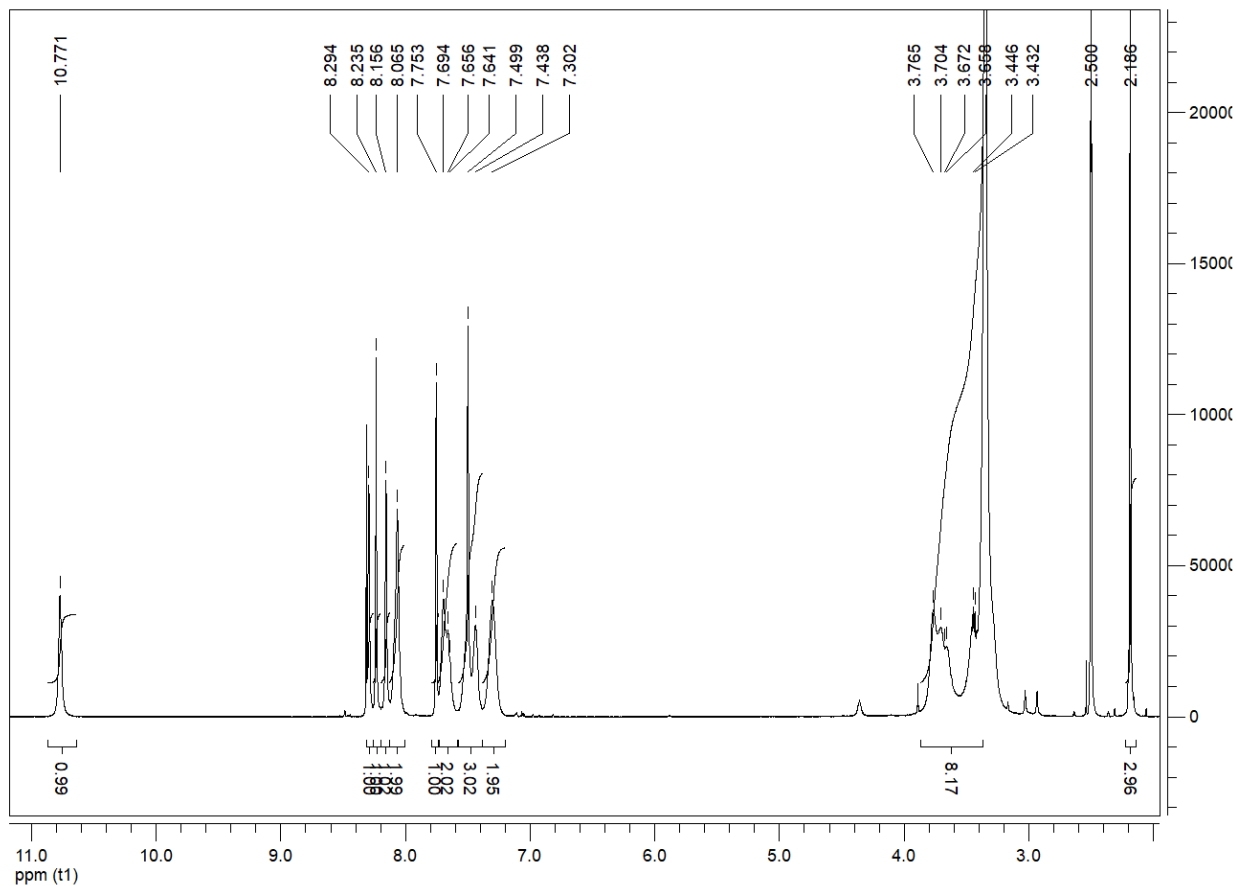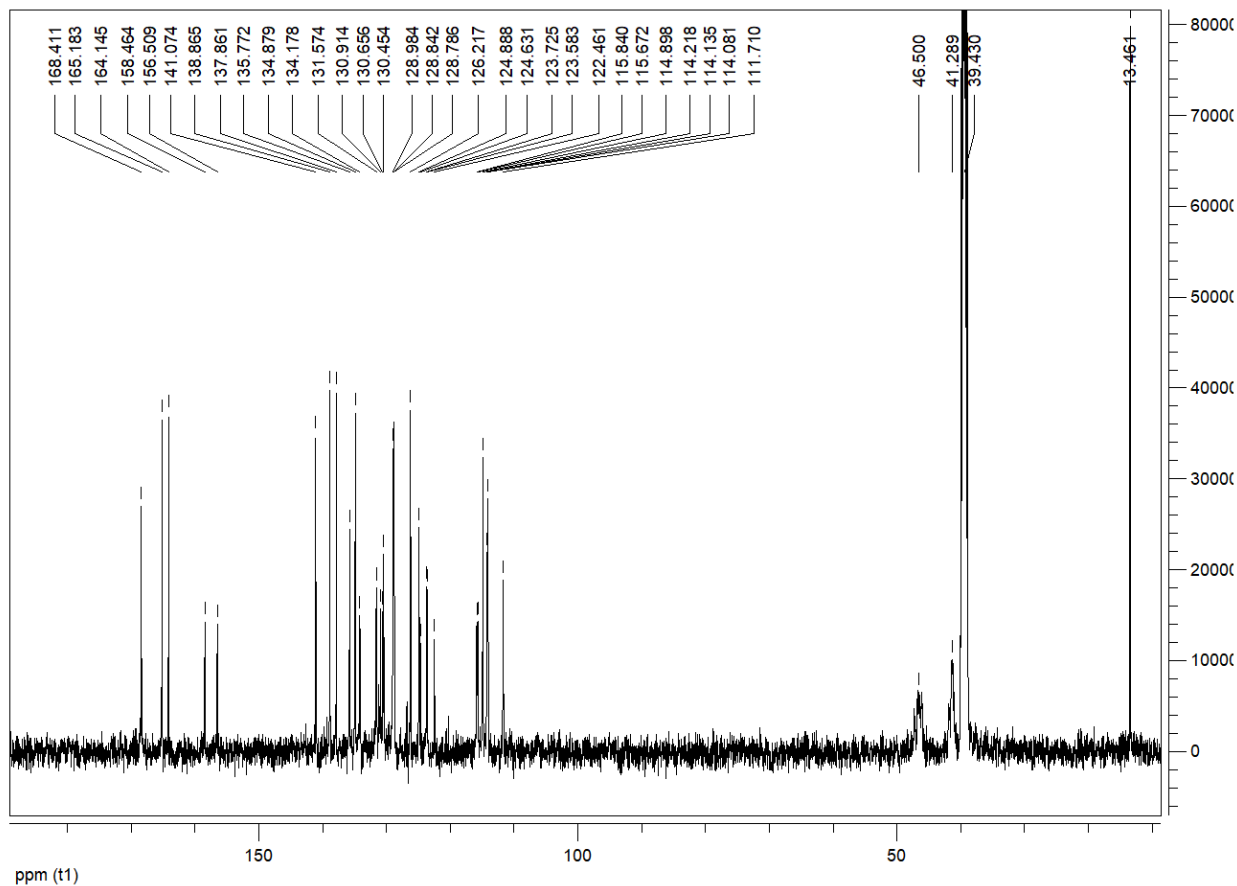

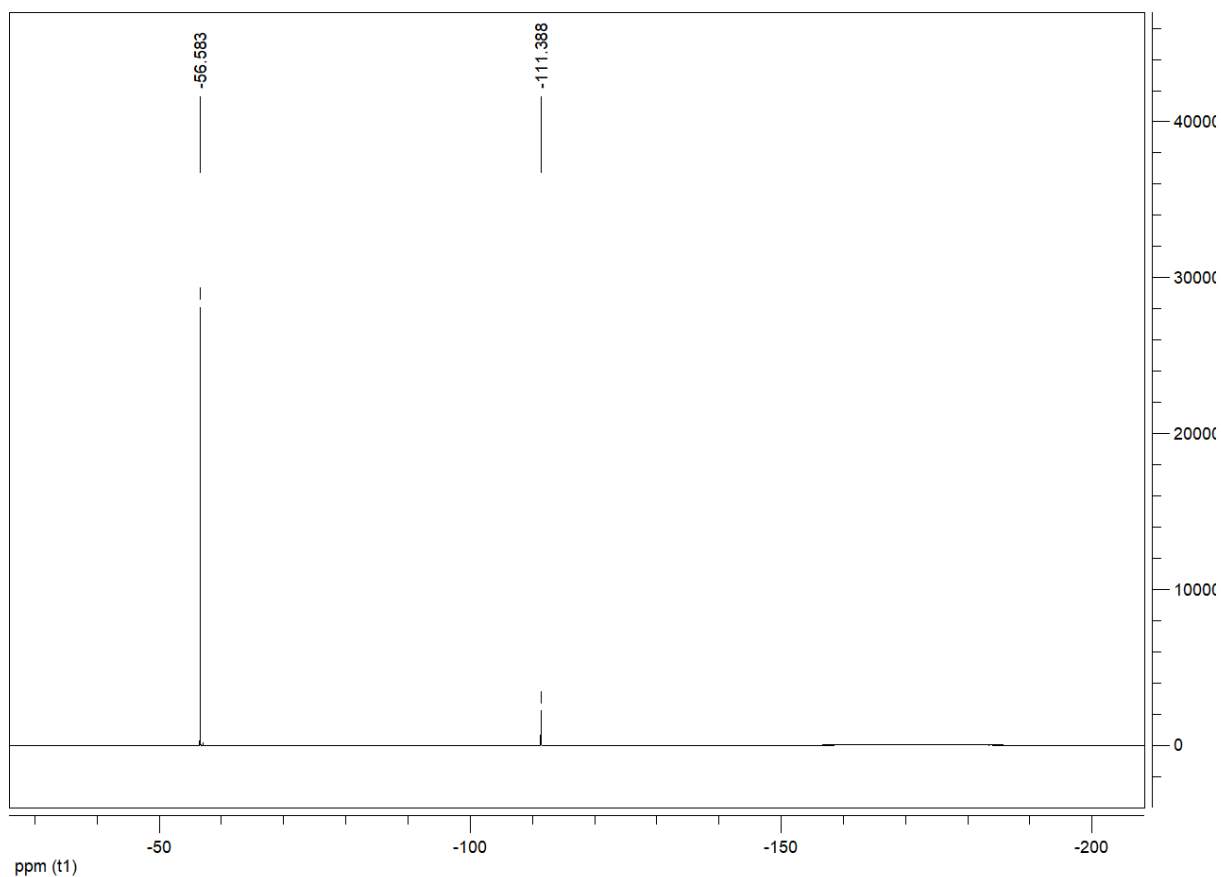

<sup>1</sup>H, <sup>13</sup>C and <sup>19</sup>F NMR spectra of compound **15** (DMSO-d<sub>6</sub>),  
**3-(4-(3-Fluorobenzoyl)piperazine-1-carbonyl)-N-(3-(4-methyl-1H-imidazol-1-yl)-5-(trifluoromethyl)phenyl)benzamide**

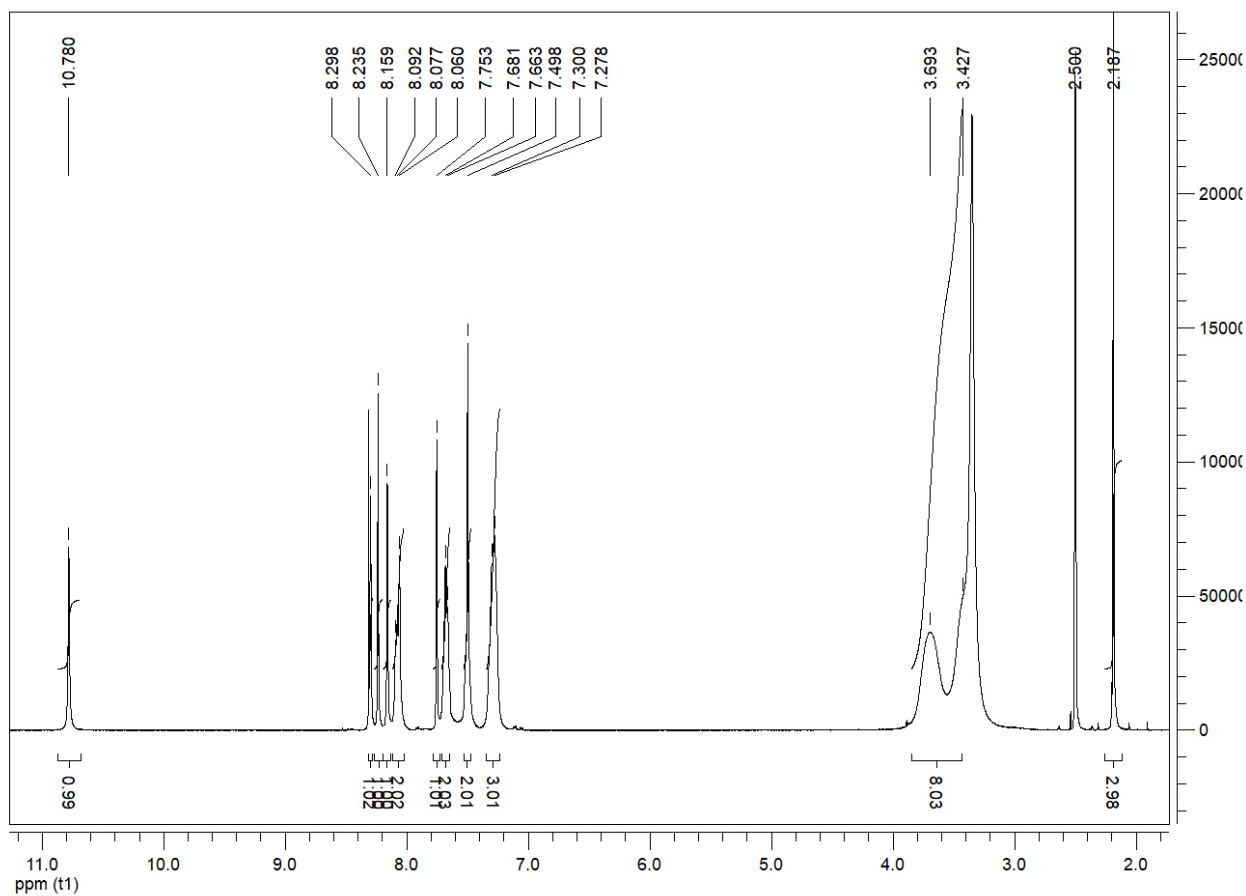

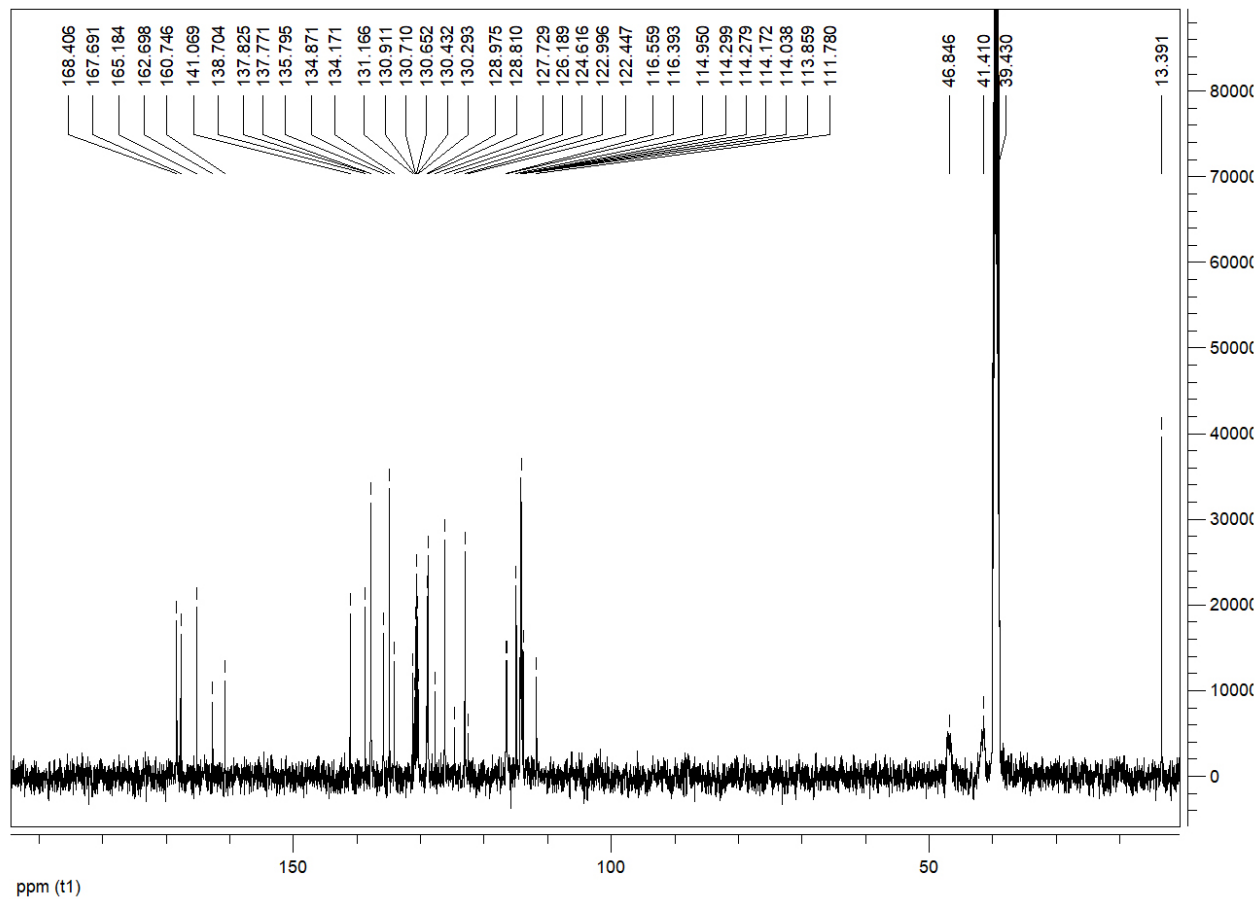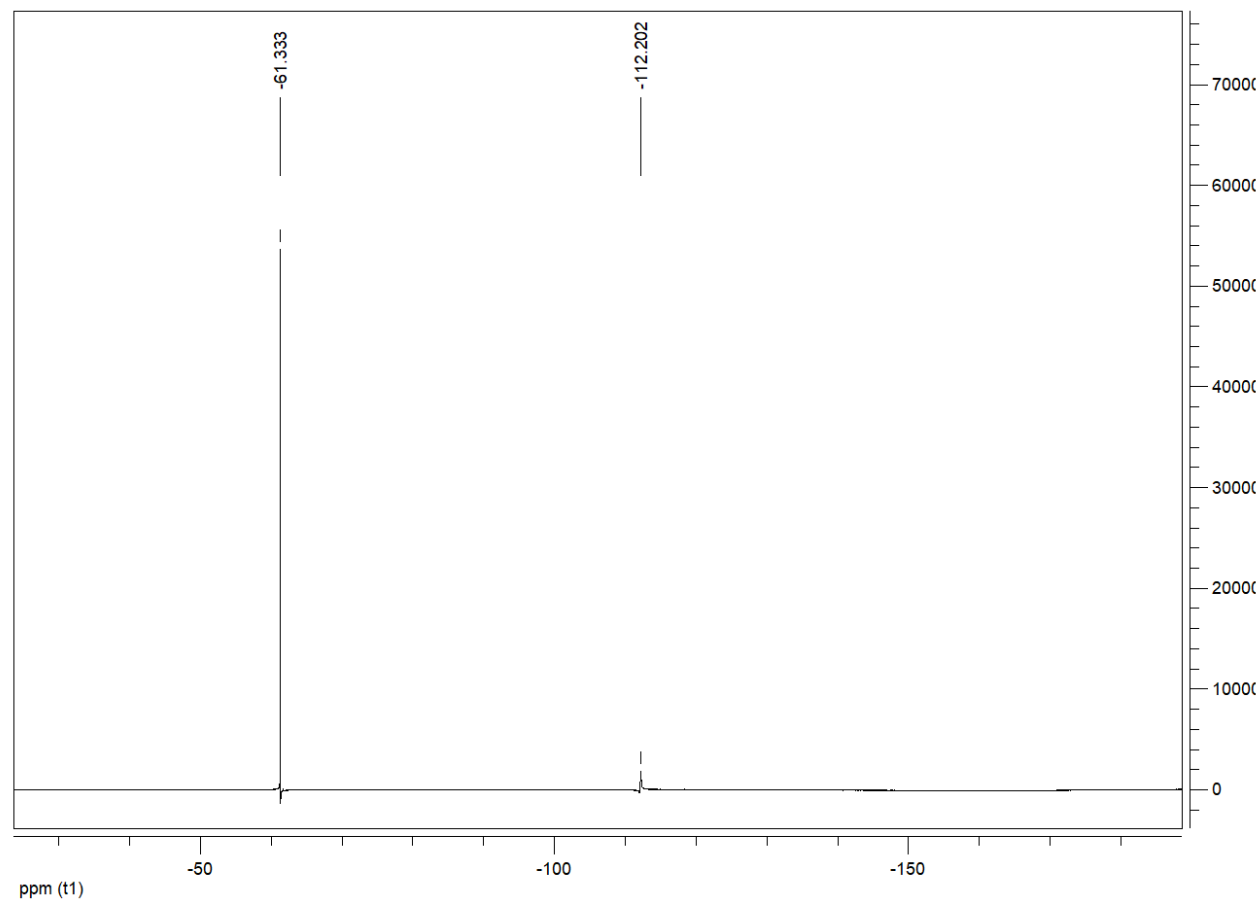



<sup>1</sup>H and <sup>13</sup>C NMR spectra of compound **16** (DMSO-d<sub>6</sub>),  
**N1-(2-methyl-5-nitrophenyl)-N3-(4-((2-(methylcarbamoyl)pyridin-4-yl)oxy)phenyl)isophthalamide**

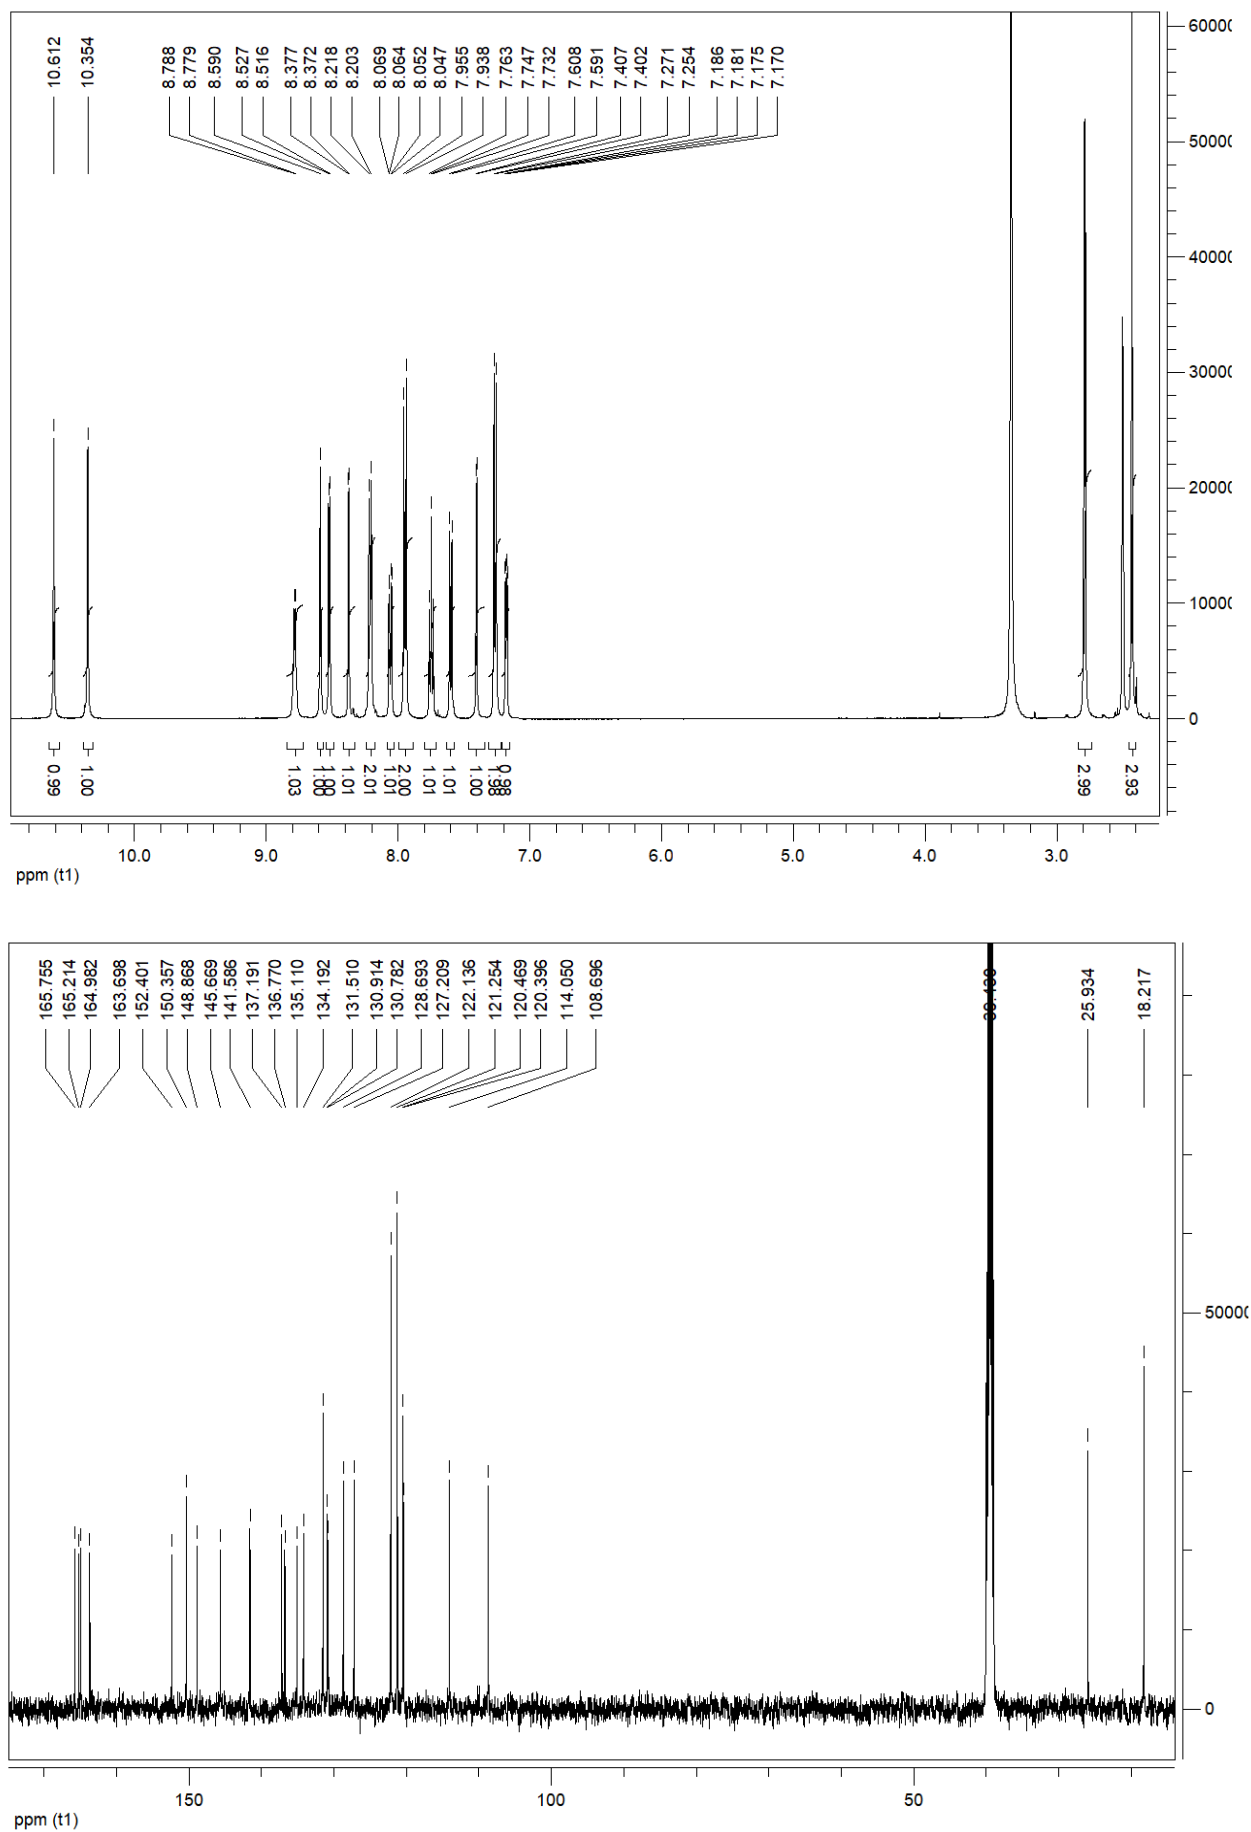

<sup>1</sup>H, <sup>13</sup>C and <sup>19</sup>F NMR spectra of compound **17** (DMSO-d<sub>6</sub>),  
**N1-(3-(4-methyl-1H-imidazol-1-yl)-5-(trifluoromethyl)phenyl)-N4-(3-(trifluoromethyl)phenyl)-  
 terephthalamide**

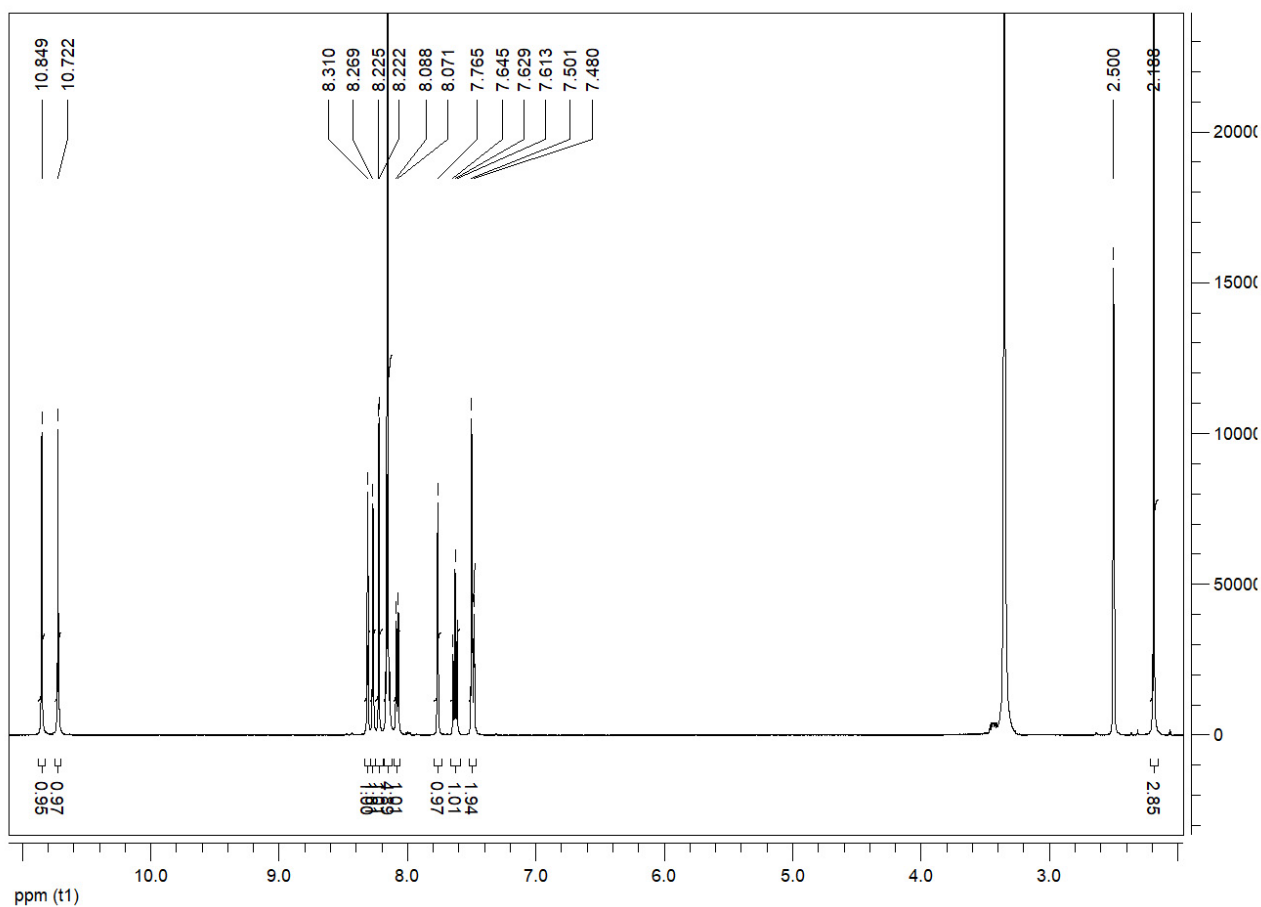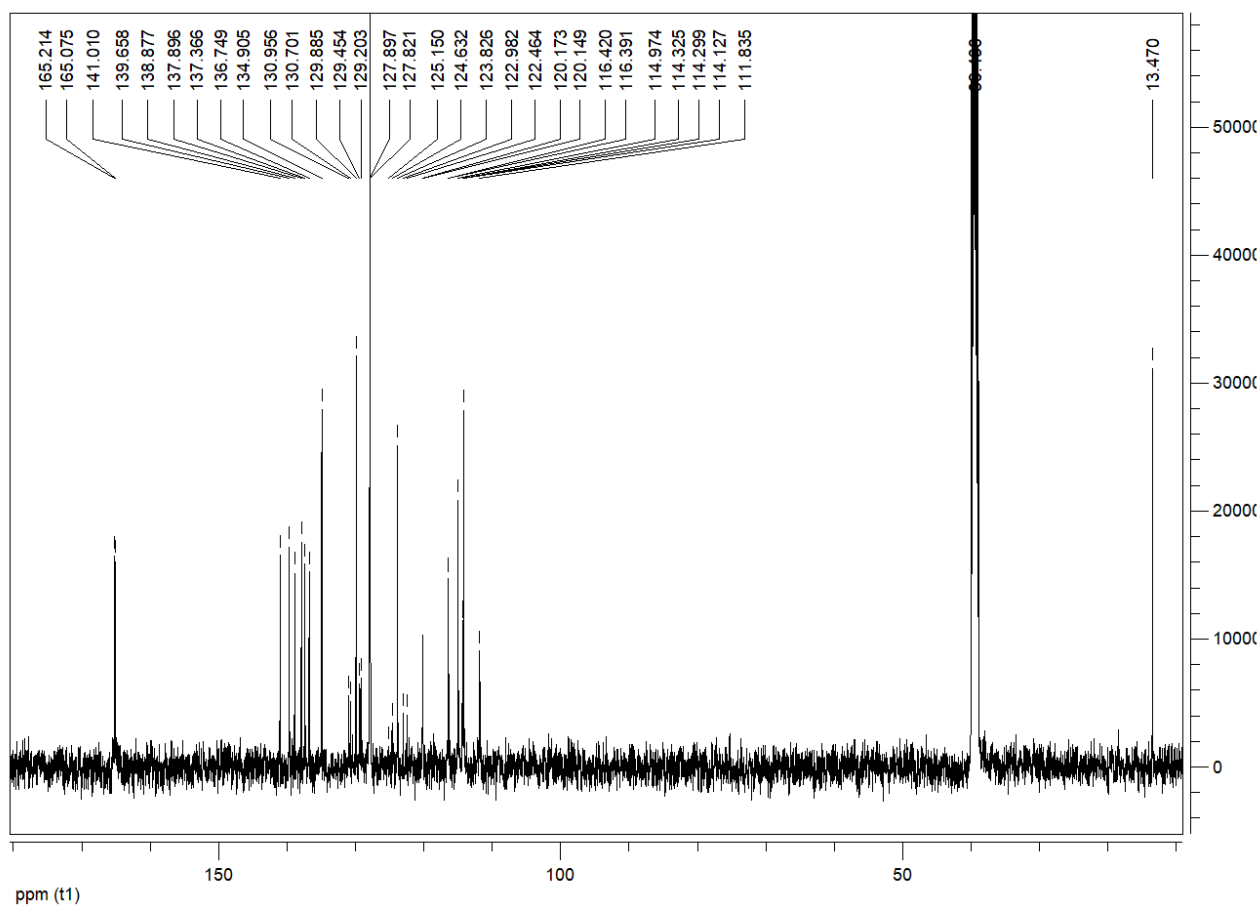

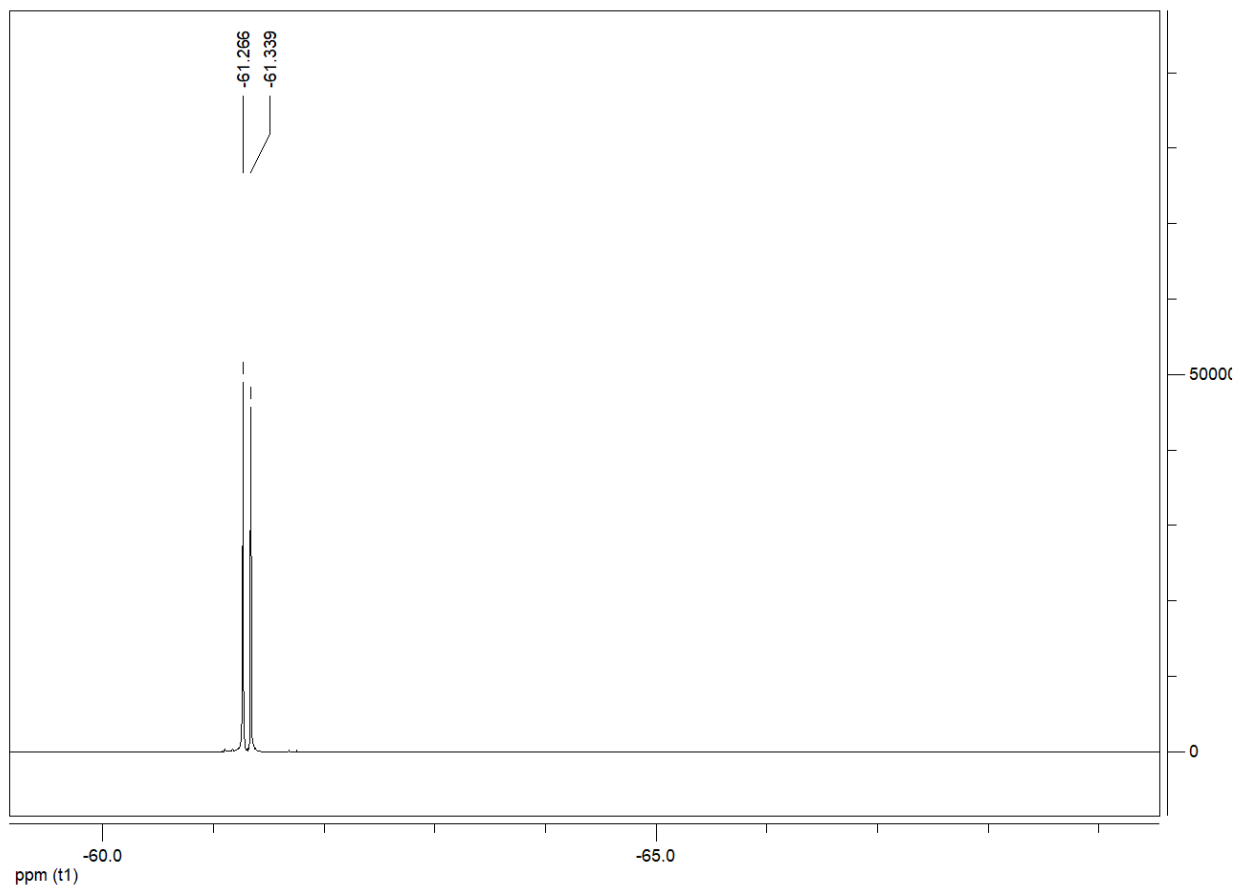

<sup>1</sup>H, <sup>13</sup>C and <sup>19</sup>F NMR spectra of compound 18 (DMSO-d<sub>6</sub>),  
**N1-(4-((2-(methylcarbamoyl)pyridin-4-yl)oxy)phenyl)-N4-(3-(trifluoromethyl)phenyl)terephthalamide**

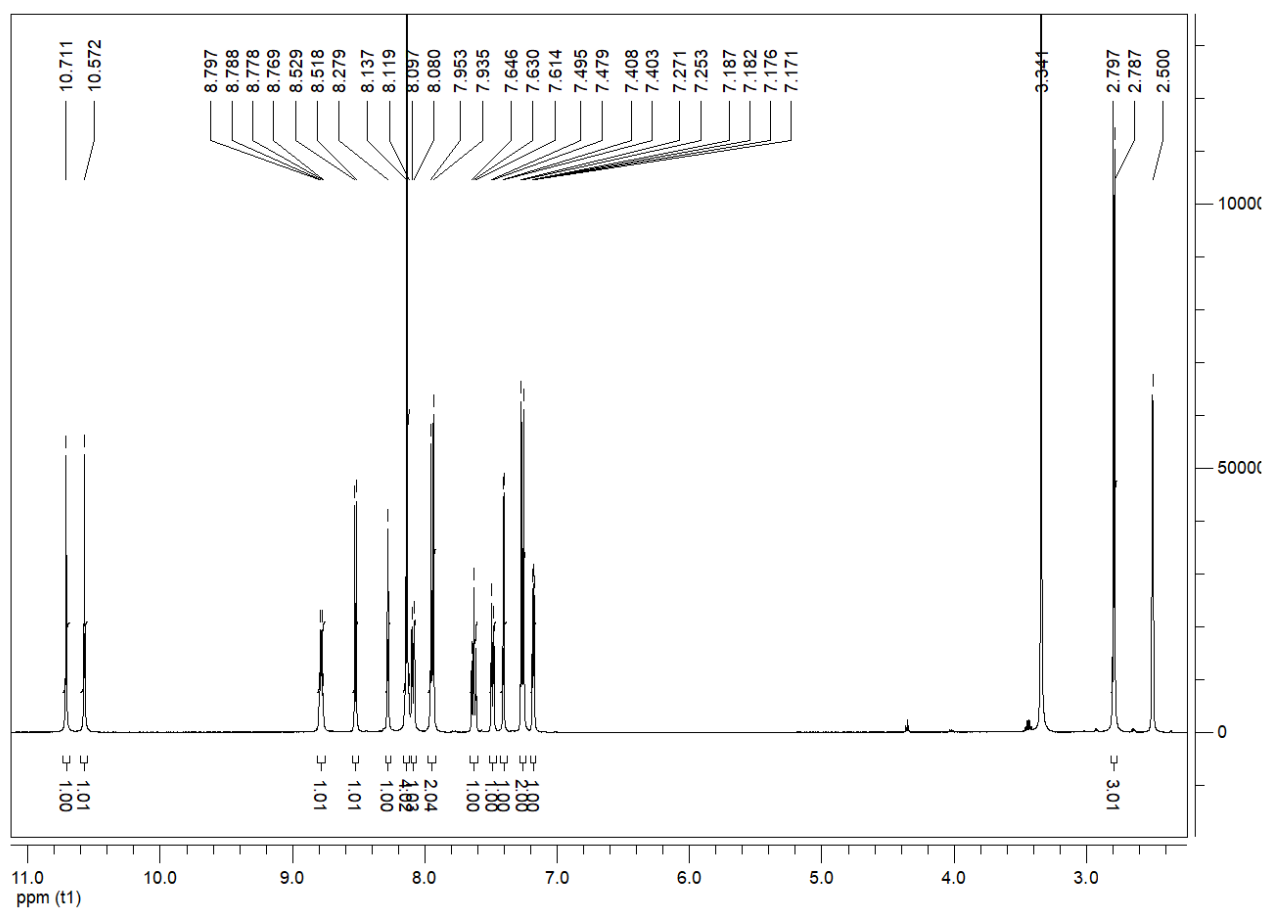

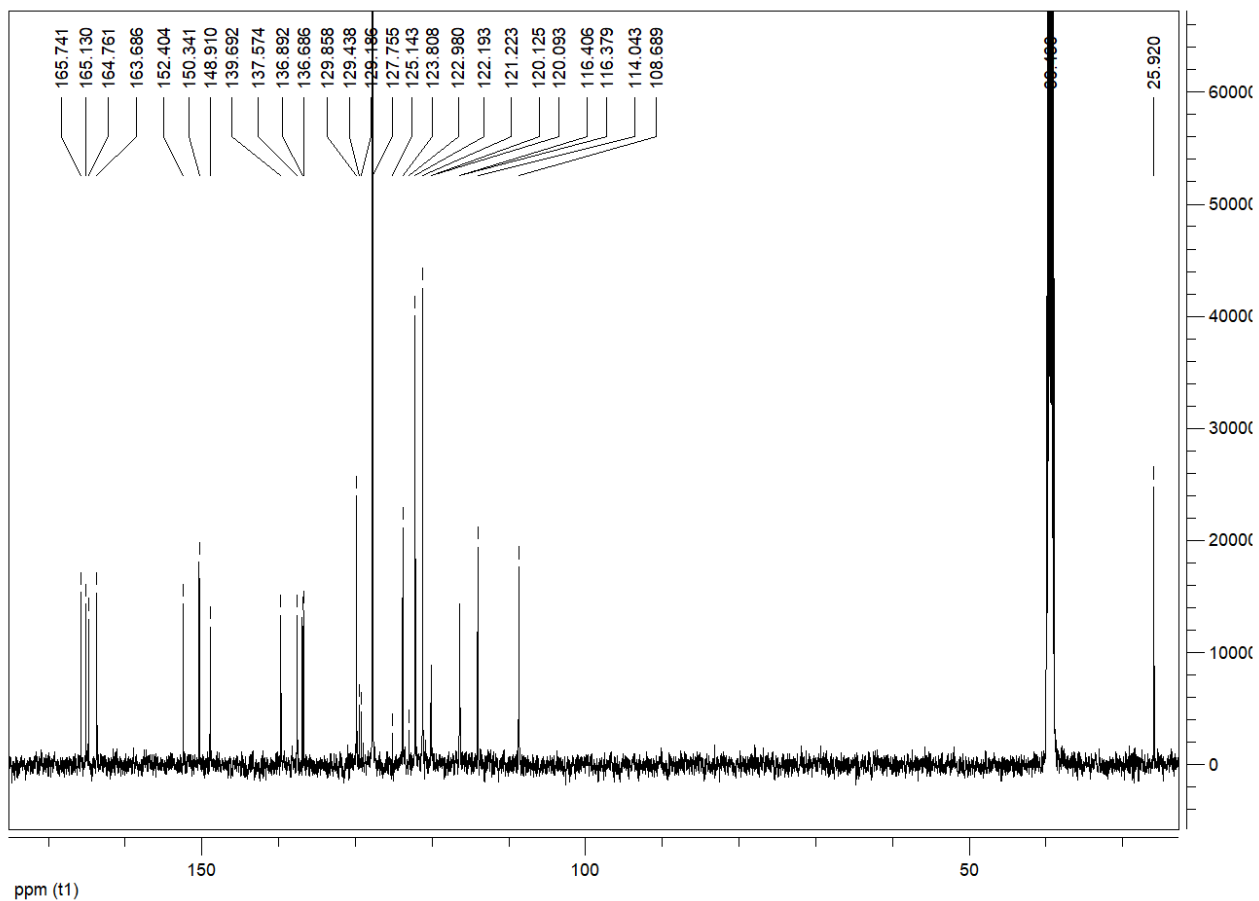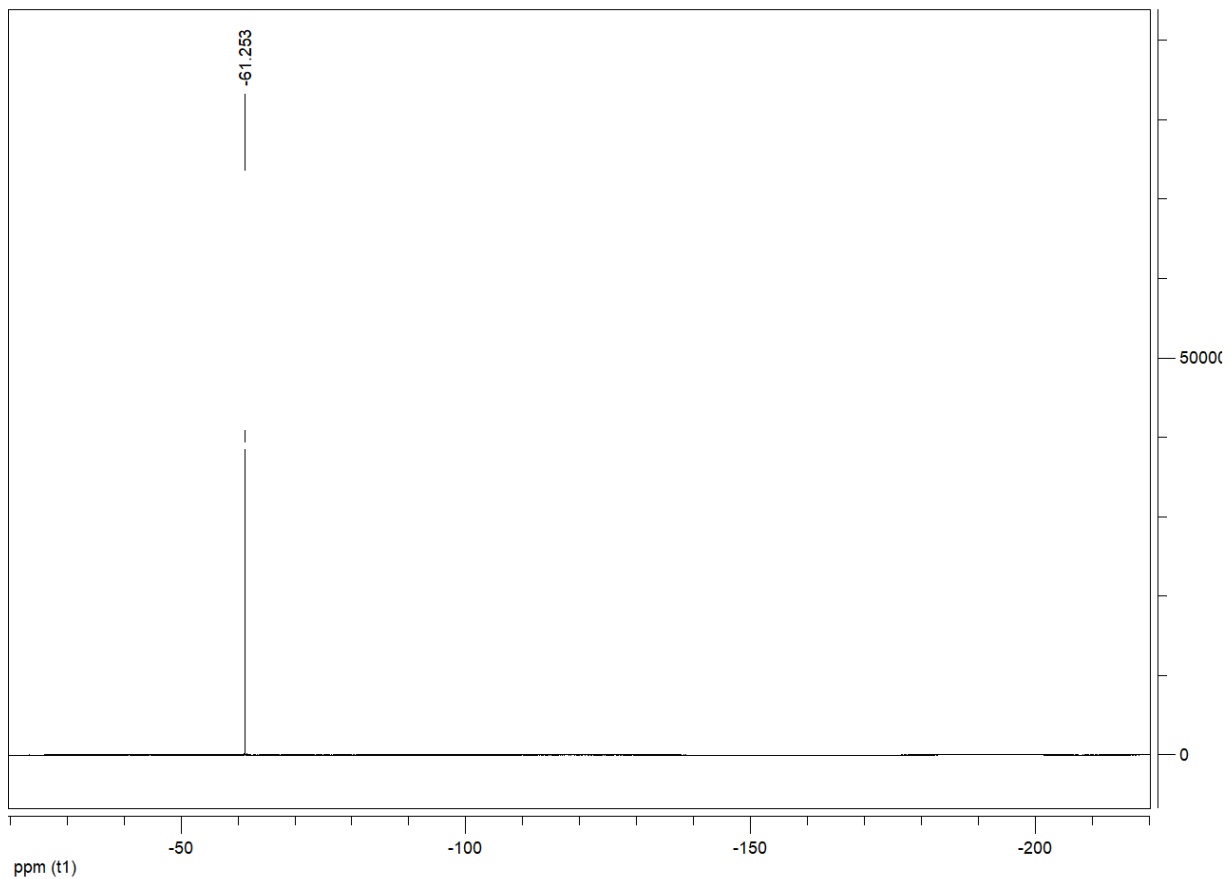

<sup>1</sup>H, <sup>13</sup>C and <sup>19</sup>F NMR spectra of compound **19** (DMSO-d<sub>6</sub>),  
**4-(4-(4-Methoxybenzoyl)piperazine-1-carbonyl)-N-(3-(trifluoromethyl)phenyl)benzamide**

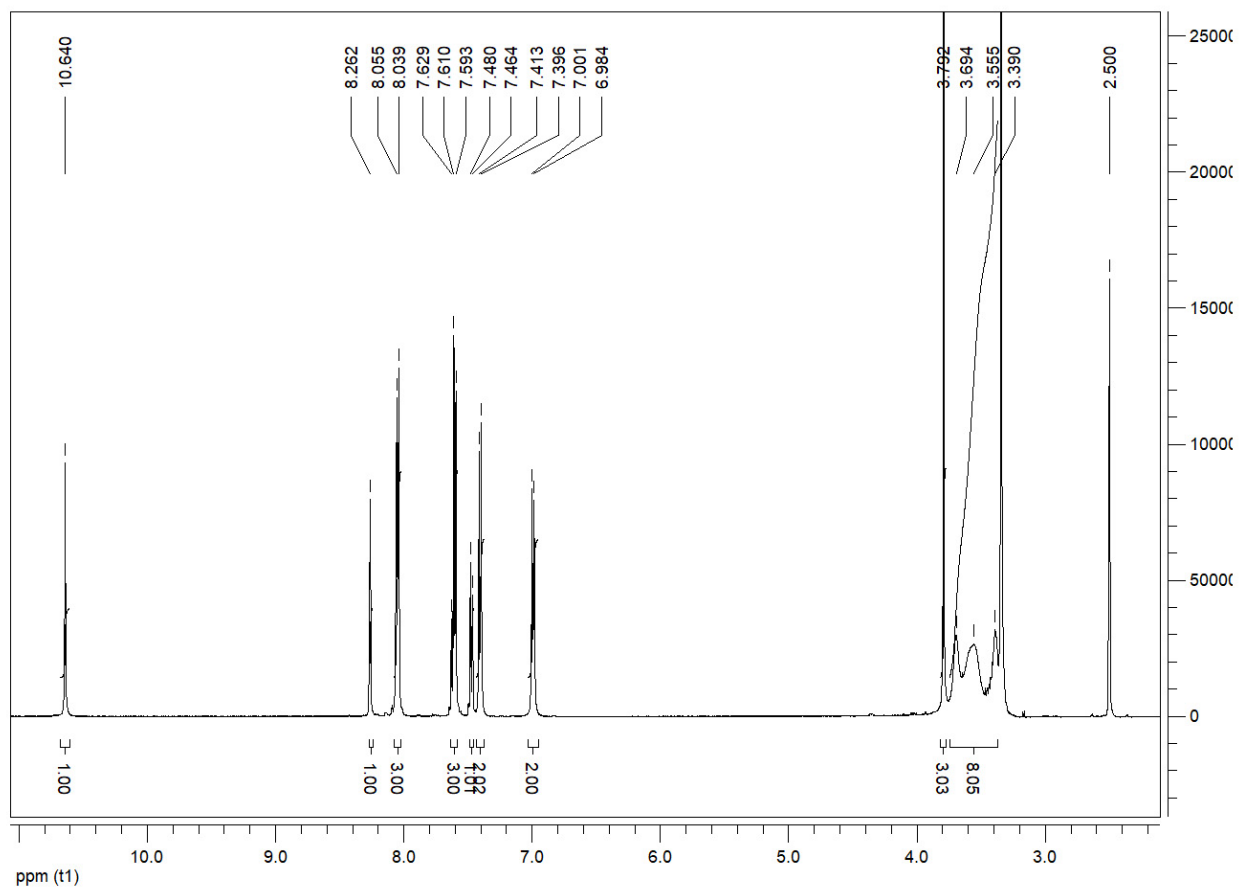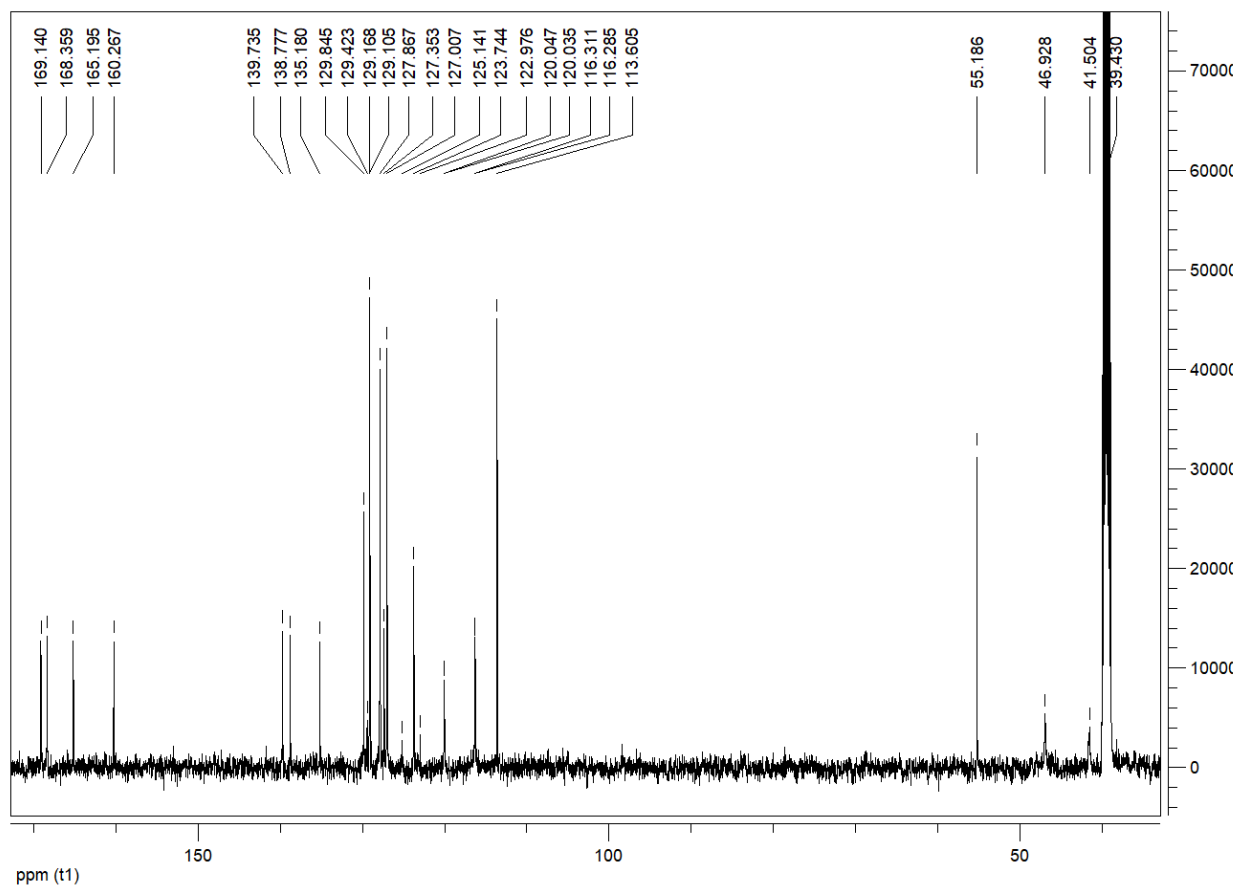

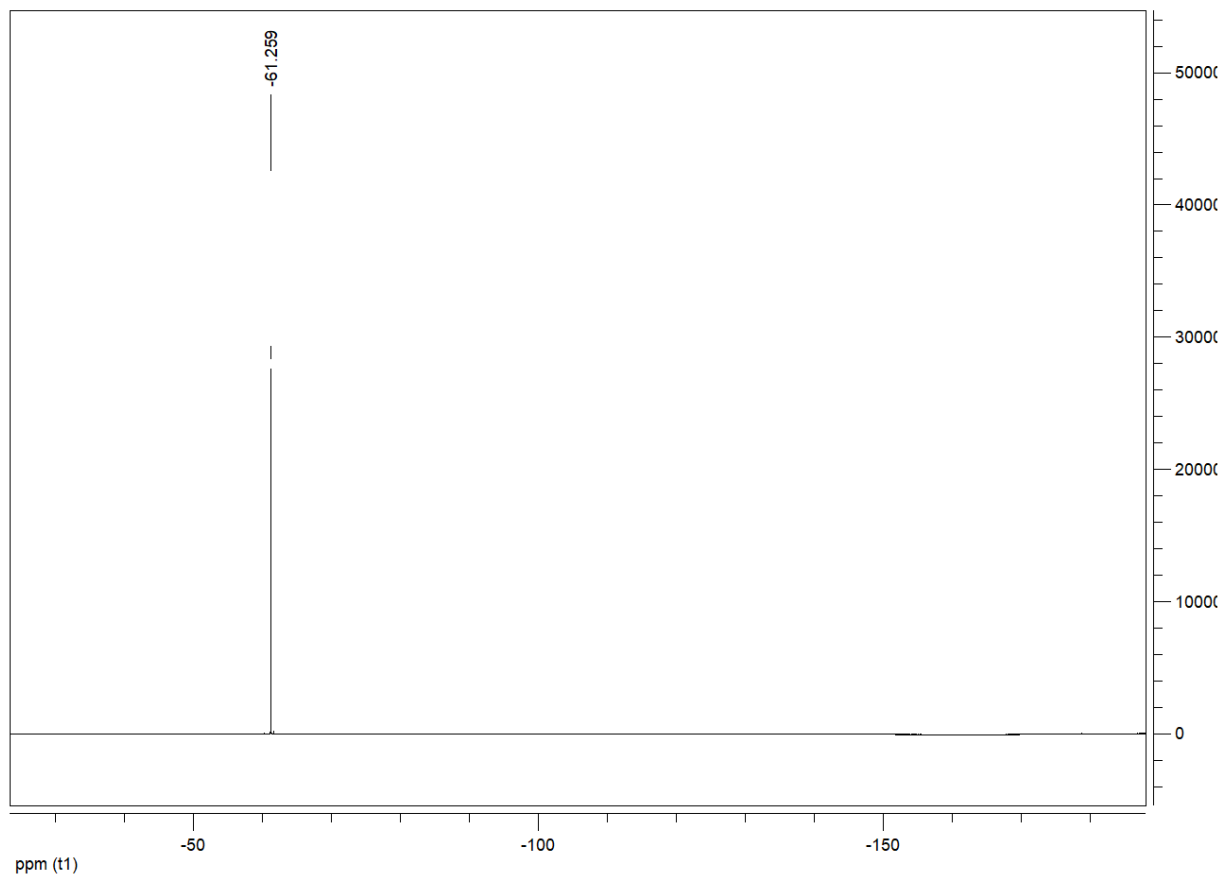

<sup>1</sup>H, <sup>13</sup>C and <sup>19</sup>F NMR spectra of compound 20 (DMSO-d<sub>6</sub>),  
**4-(4-(2-Fluorobenzoyl)piperazine-1-carbonyl)-N-(3-(trifluoromethyl)phenyl)benzamide**

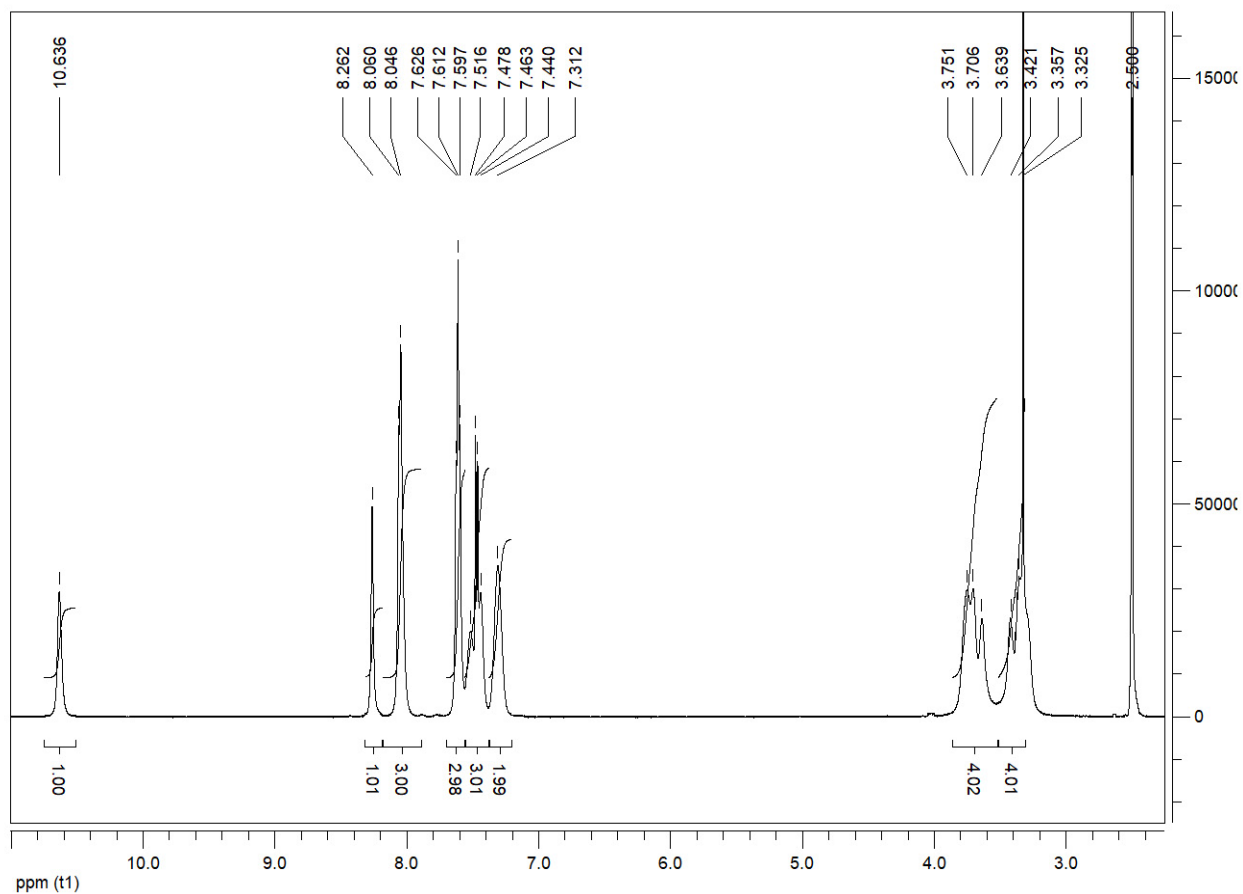

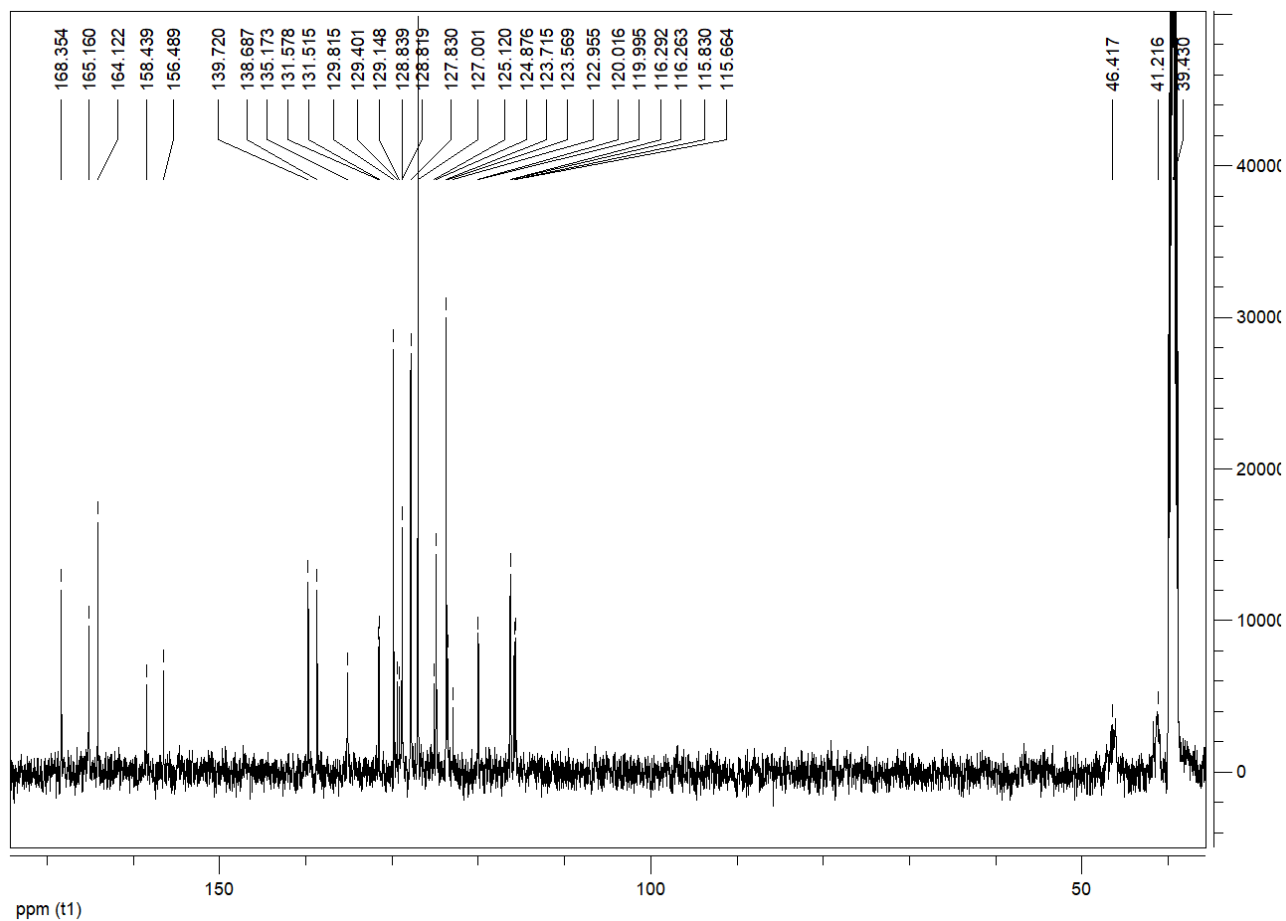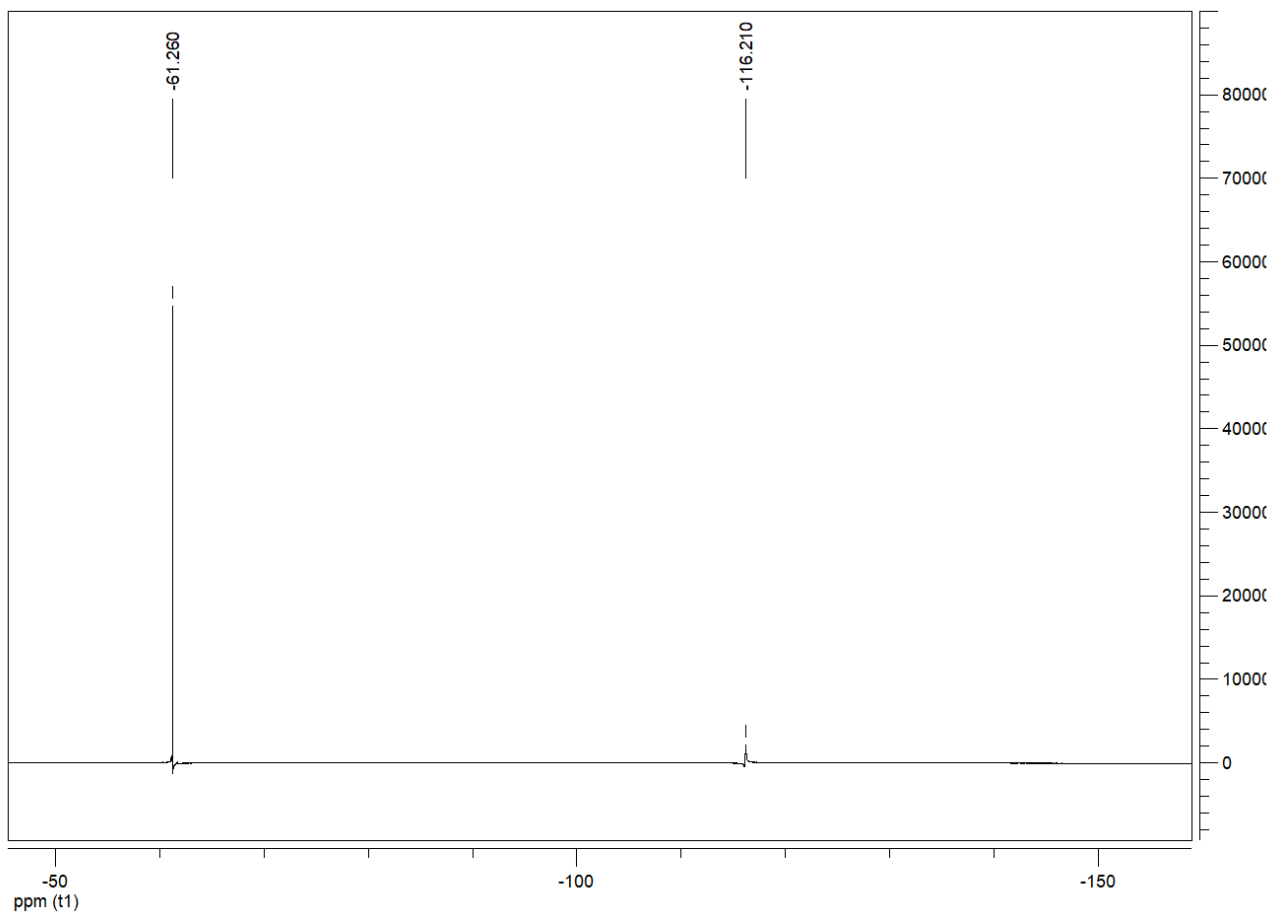

<sup>1</sup>H, <sup>13</sup>C and <sup>19</sup>F NMR spectra of compound **21** (DMSO-d<sub>6</sub>),  
**4-(4-(3-Fluorobenzoyl)piperazine-1-carbonyl)-N-(3-(trifluoromethyl)phenyl)benzamide**

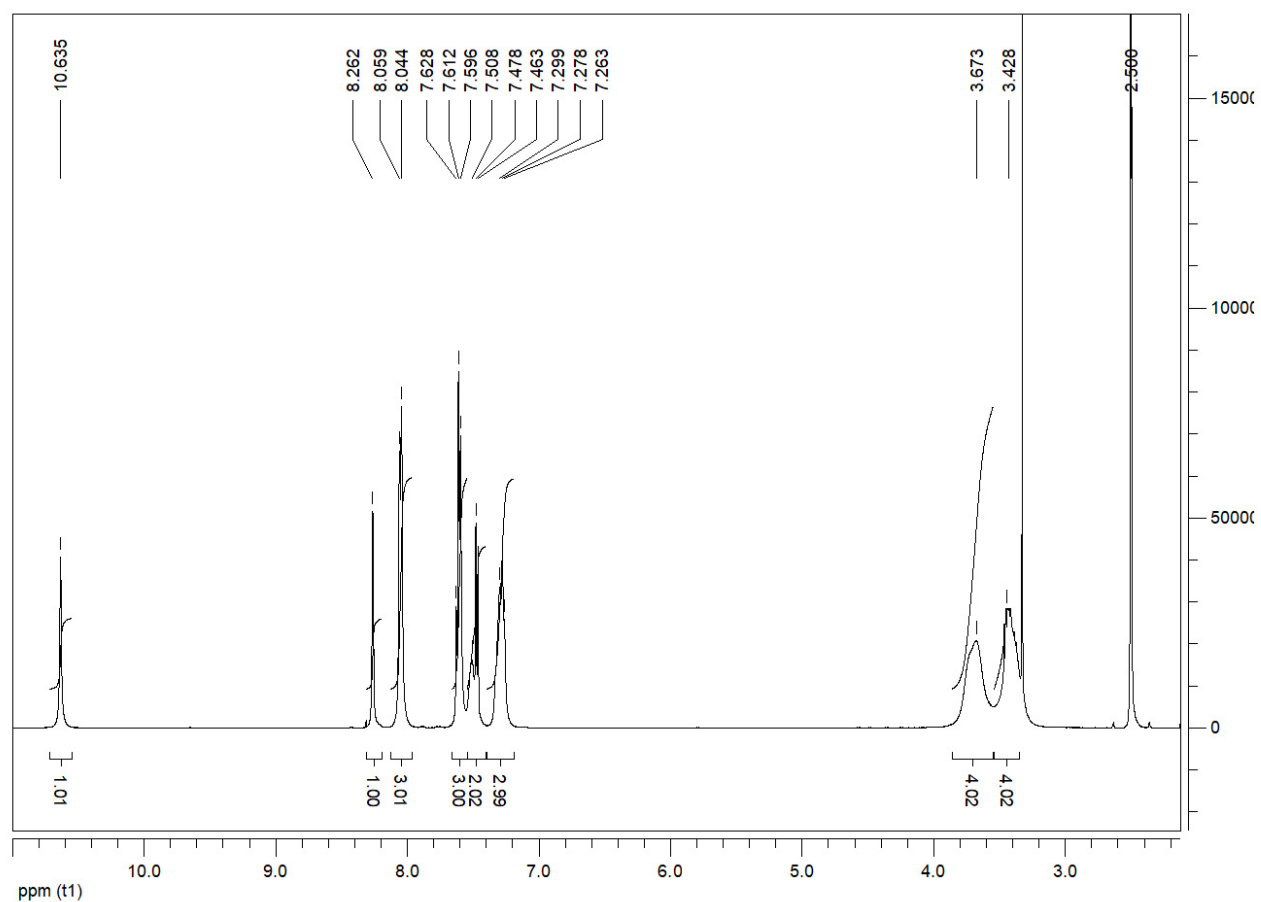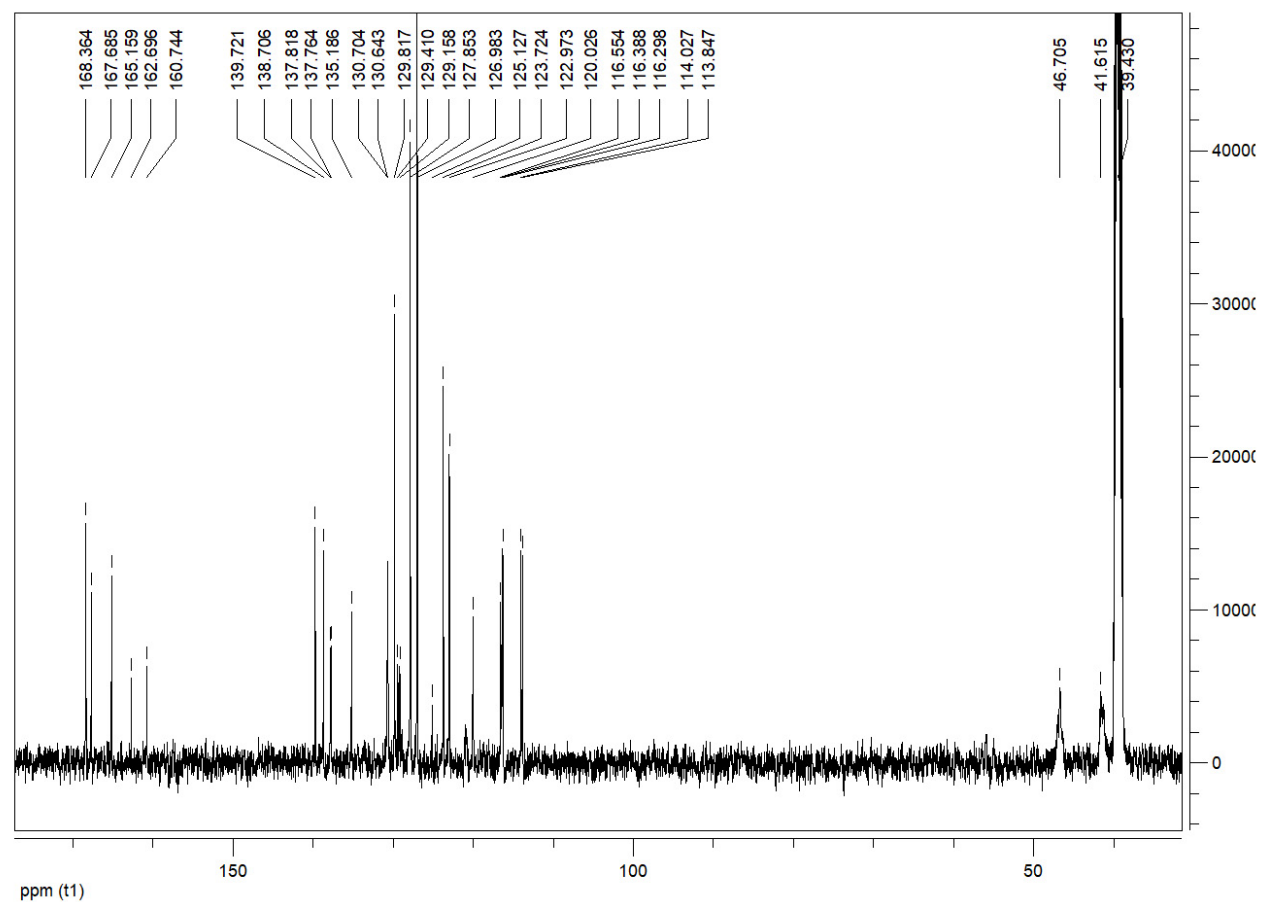



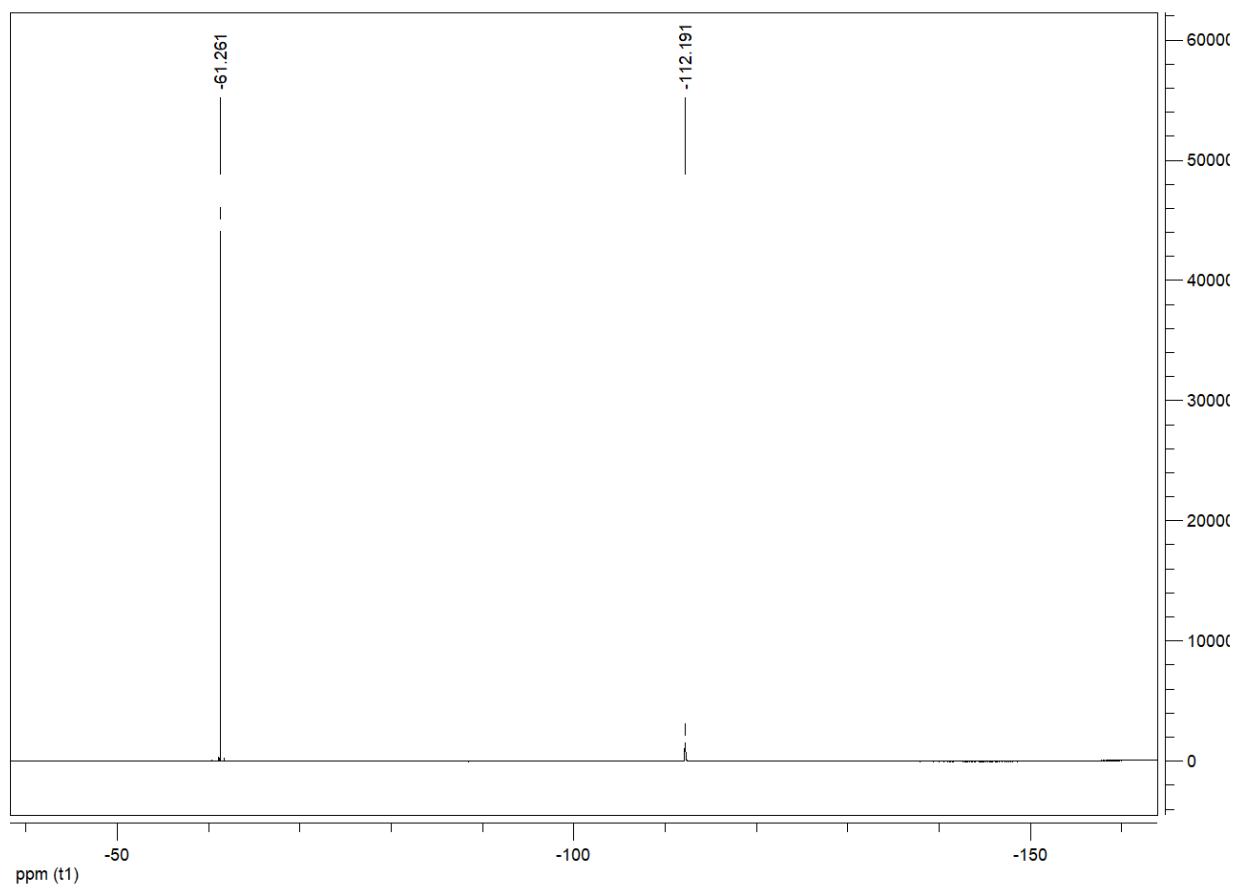

<sup>1</sup>H and <sup>13</sup>C NMR spectra of compound **22** (DMSO-d<sub>6</sub>),  
**N1,N4-bis(3-(4-methyl-1H-imidazol-1-yl)-5-(trifluoromethyl)phenyl)terephthalamide**

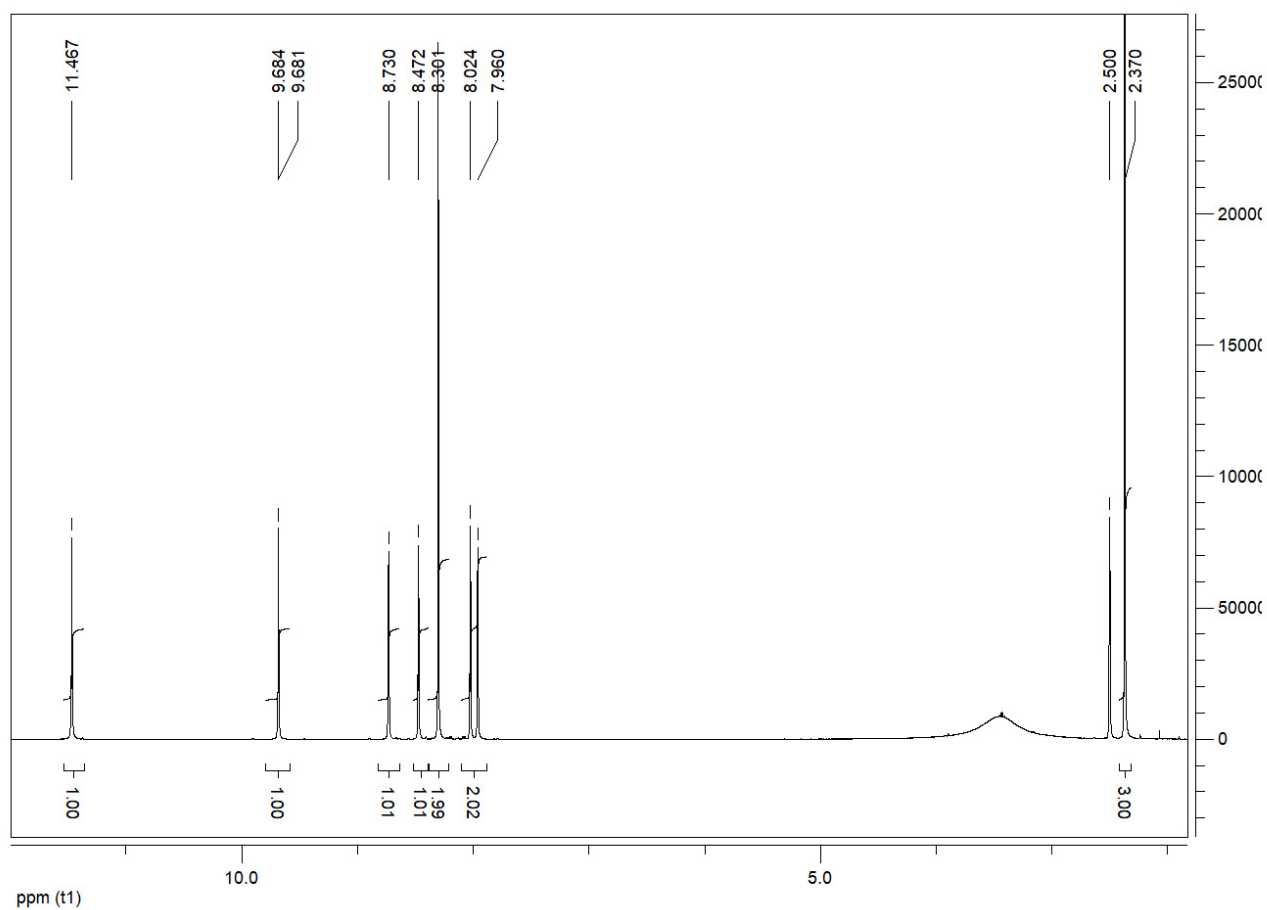

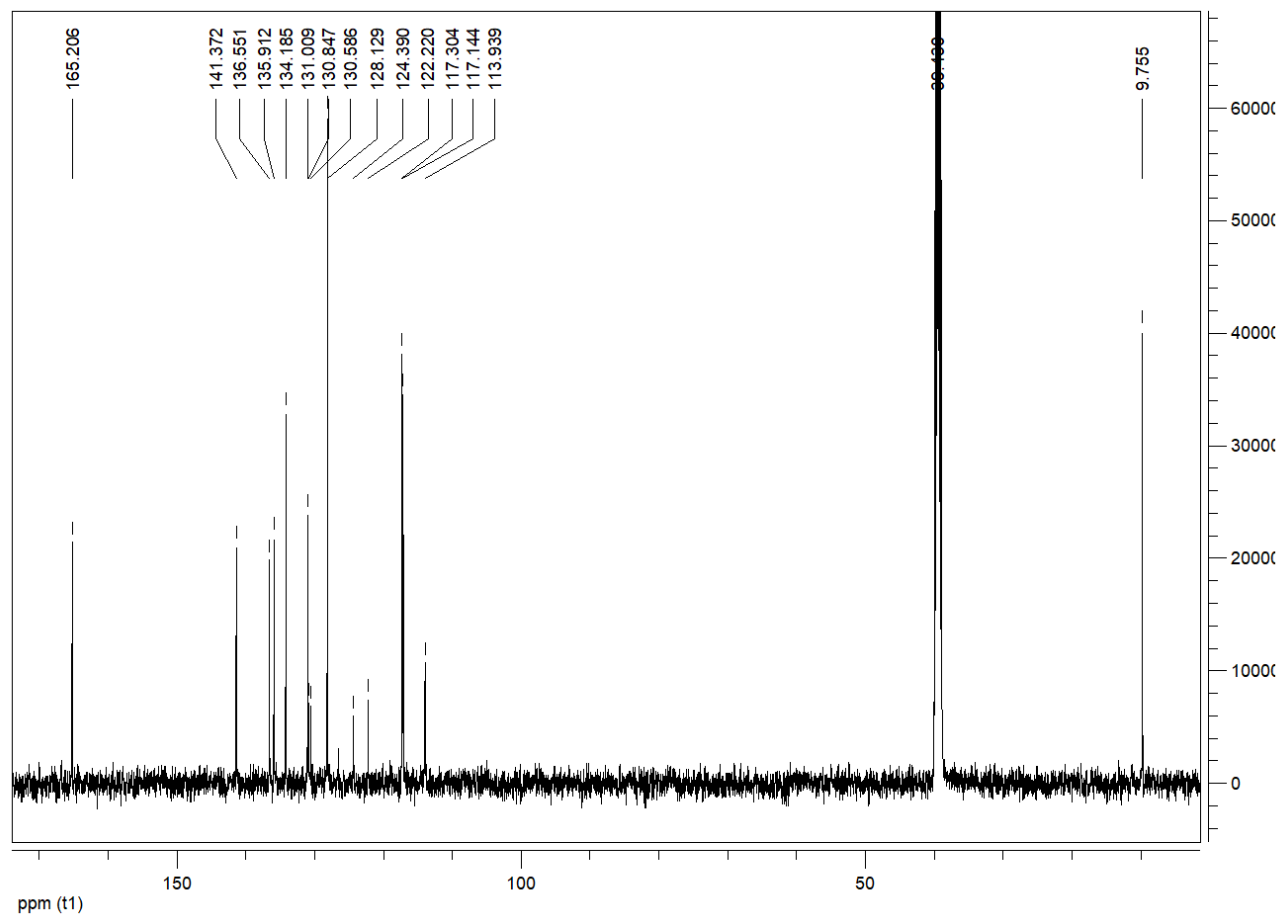

<sup>1</sup>H, <sup>13</sup>C and <sup>19</sup>F NMR spectra of compound 23 (DMSO-d<sub>6</sub>),  
**N1-(3-(4-methyl-1H-imidazol-1-yl)-5-(trifluoromethyl)phenyl)-N4-(4-((2-(methylcarbamoyl)pyridin-4-yl)oxy)phenyl)terephthalamide**

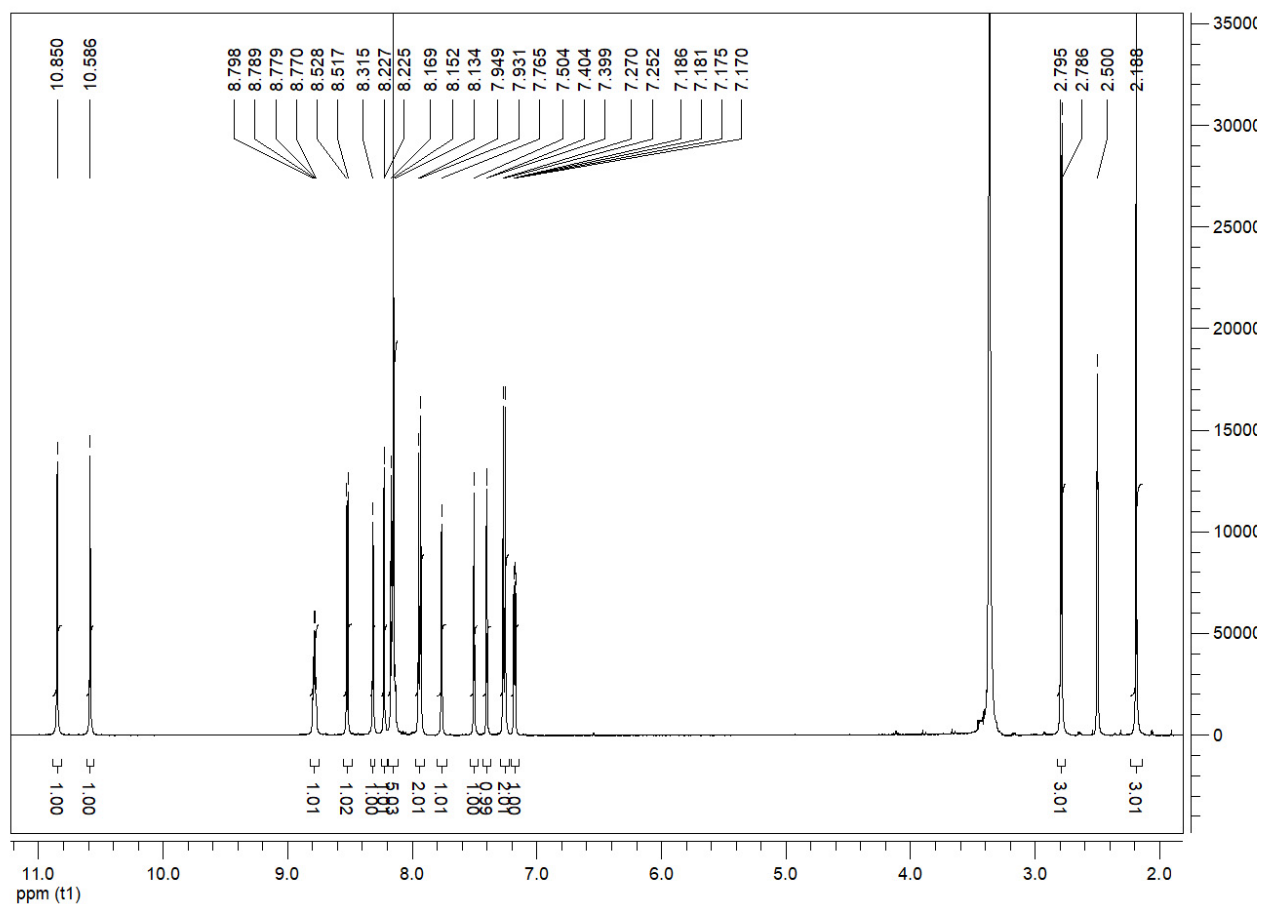

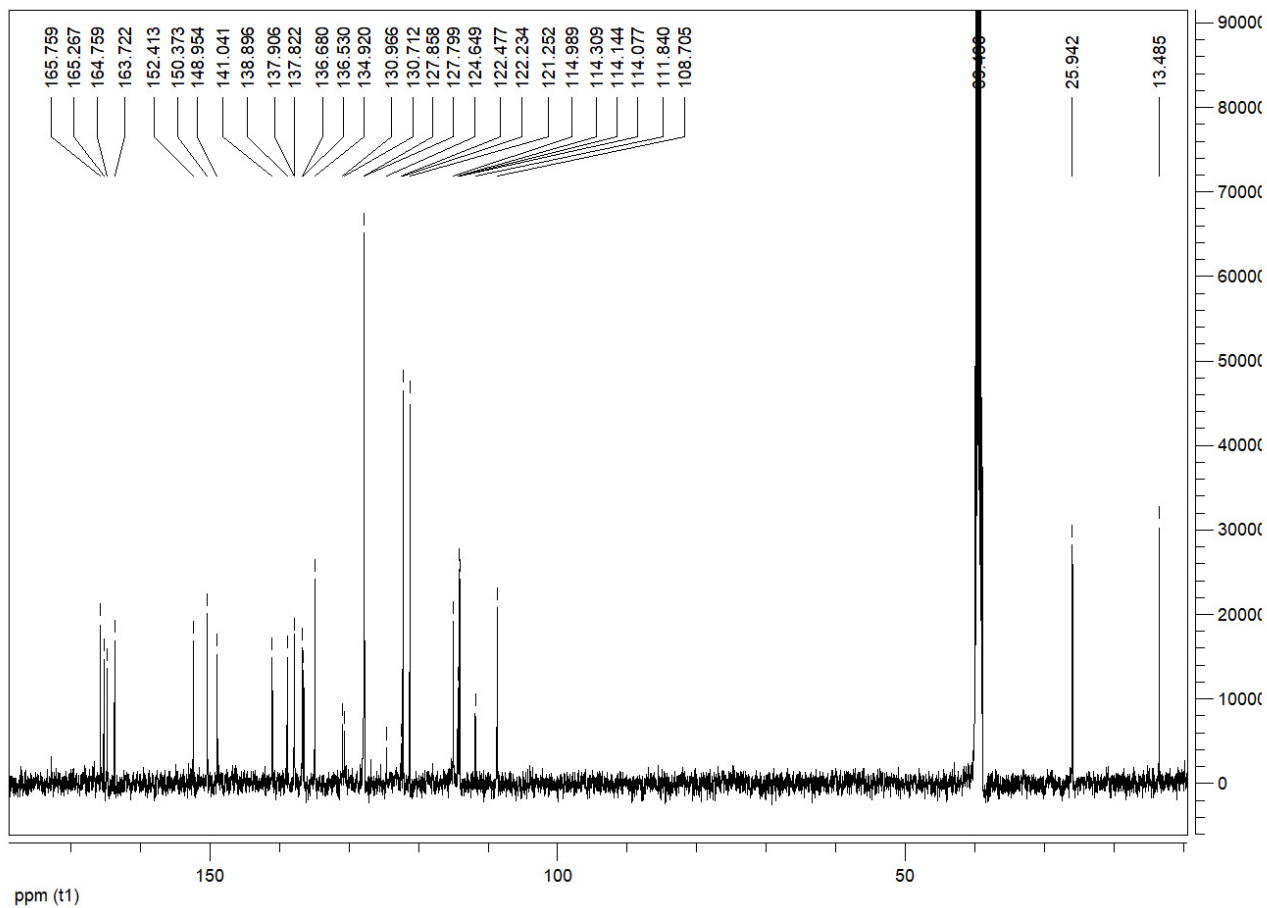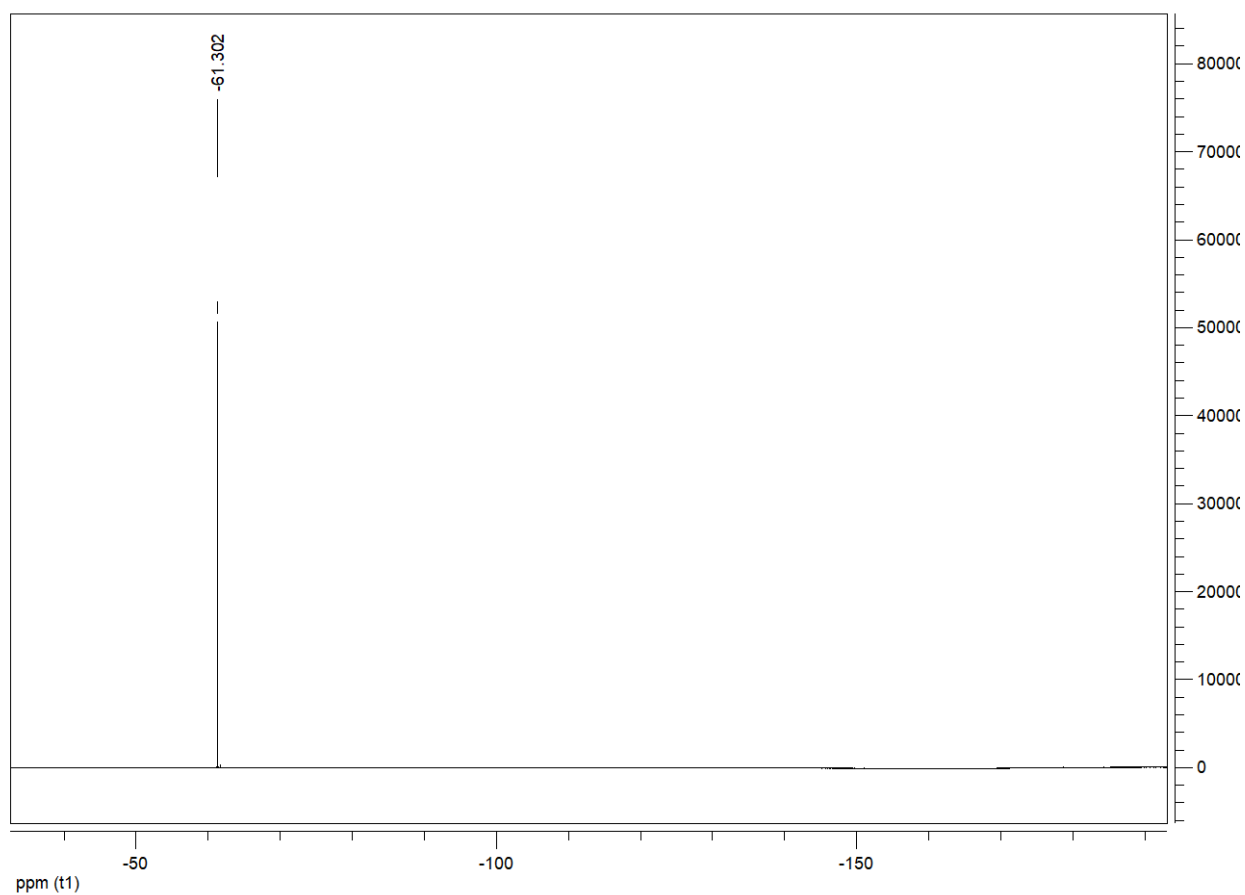

$^1\text{H}$ ,  $^{13}\text{C}$  and  $^{19}\text{F}$  NMR spectra of compound **24** (DMSO- $d_6$ ),  
**N1-(3-(4-methyl-1H-imidazol-1-yl)-5-(trifluoromethyl)phenyl)-N4-(2-methyl-5-nitrophenyl)terephthalamide**

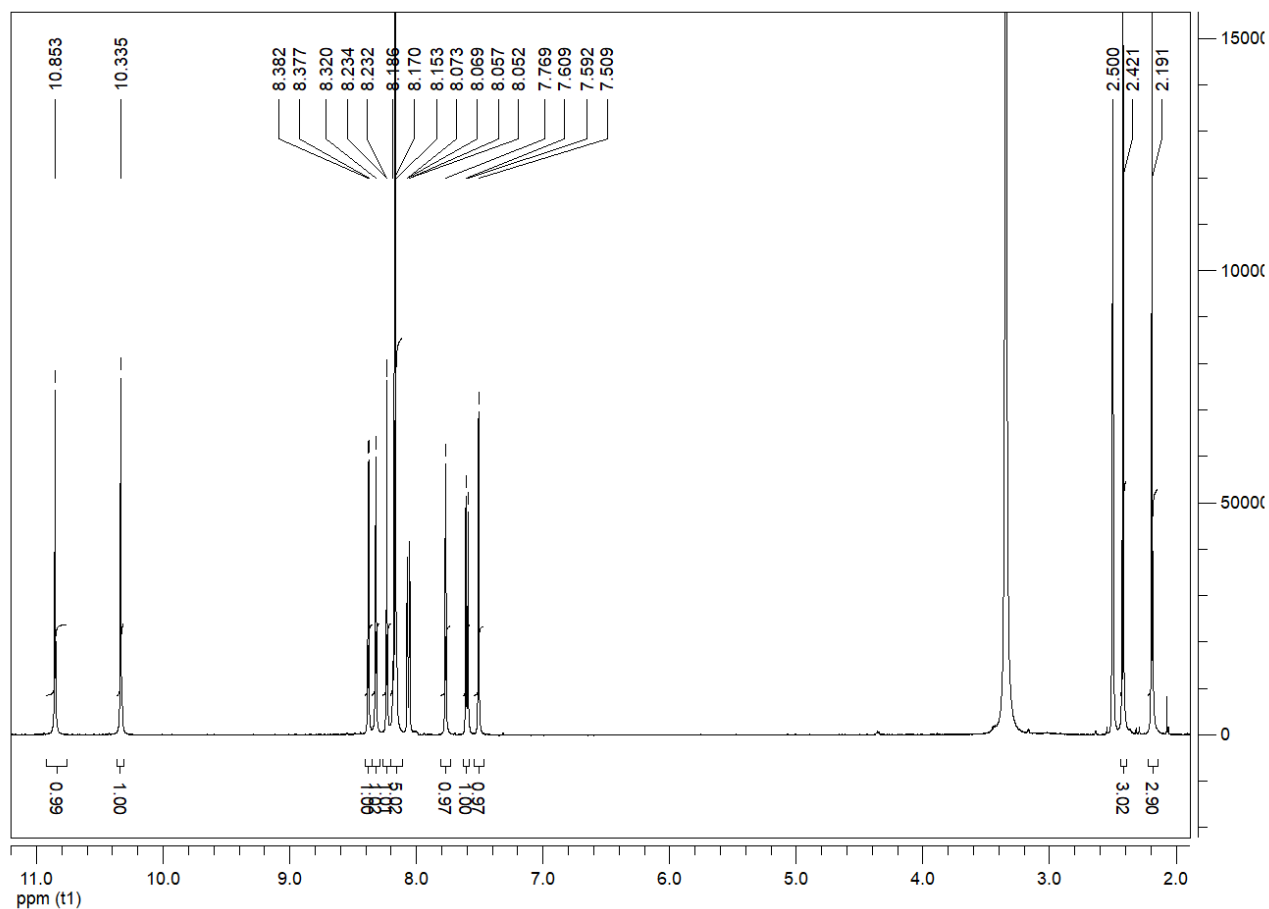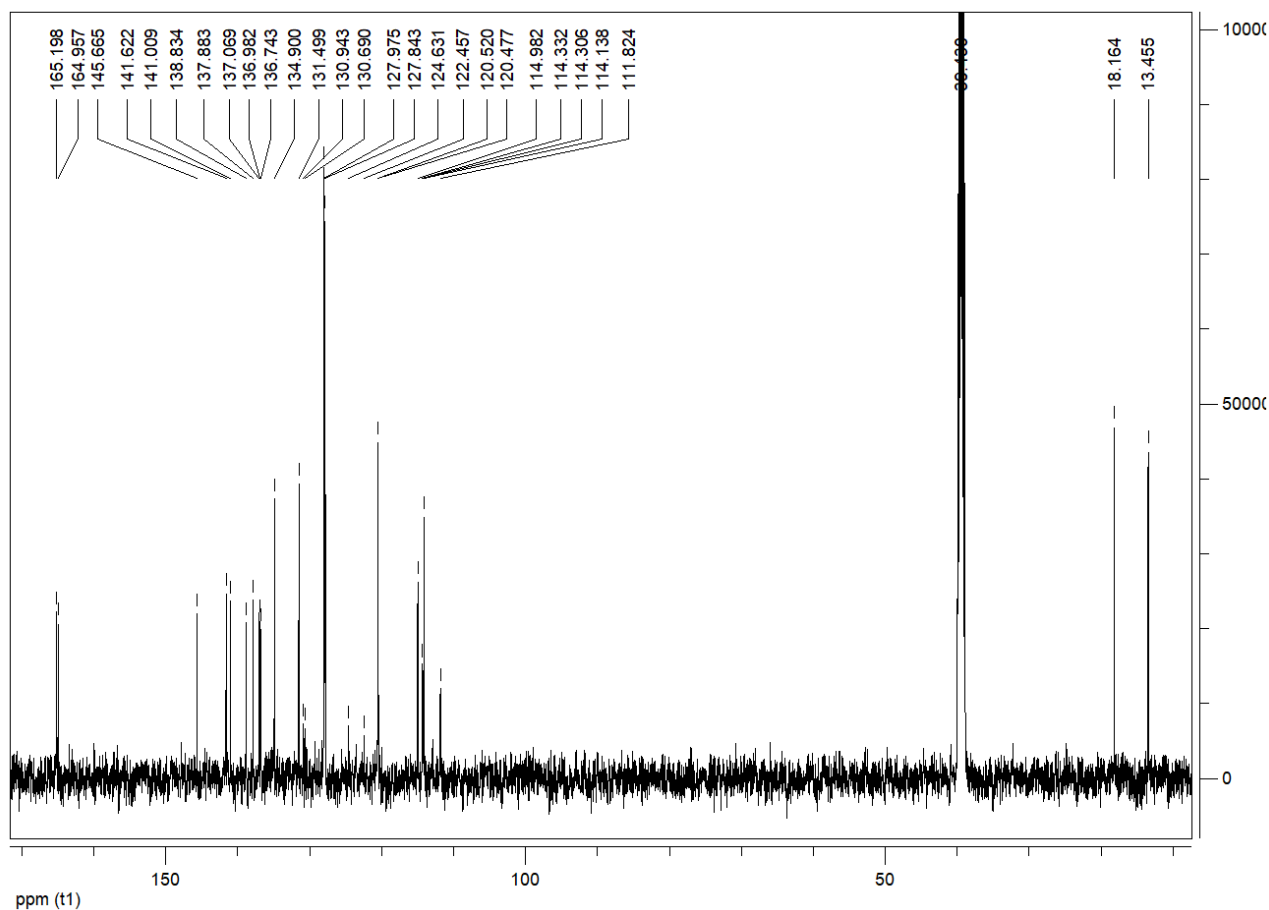

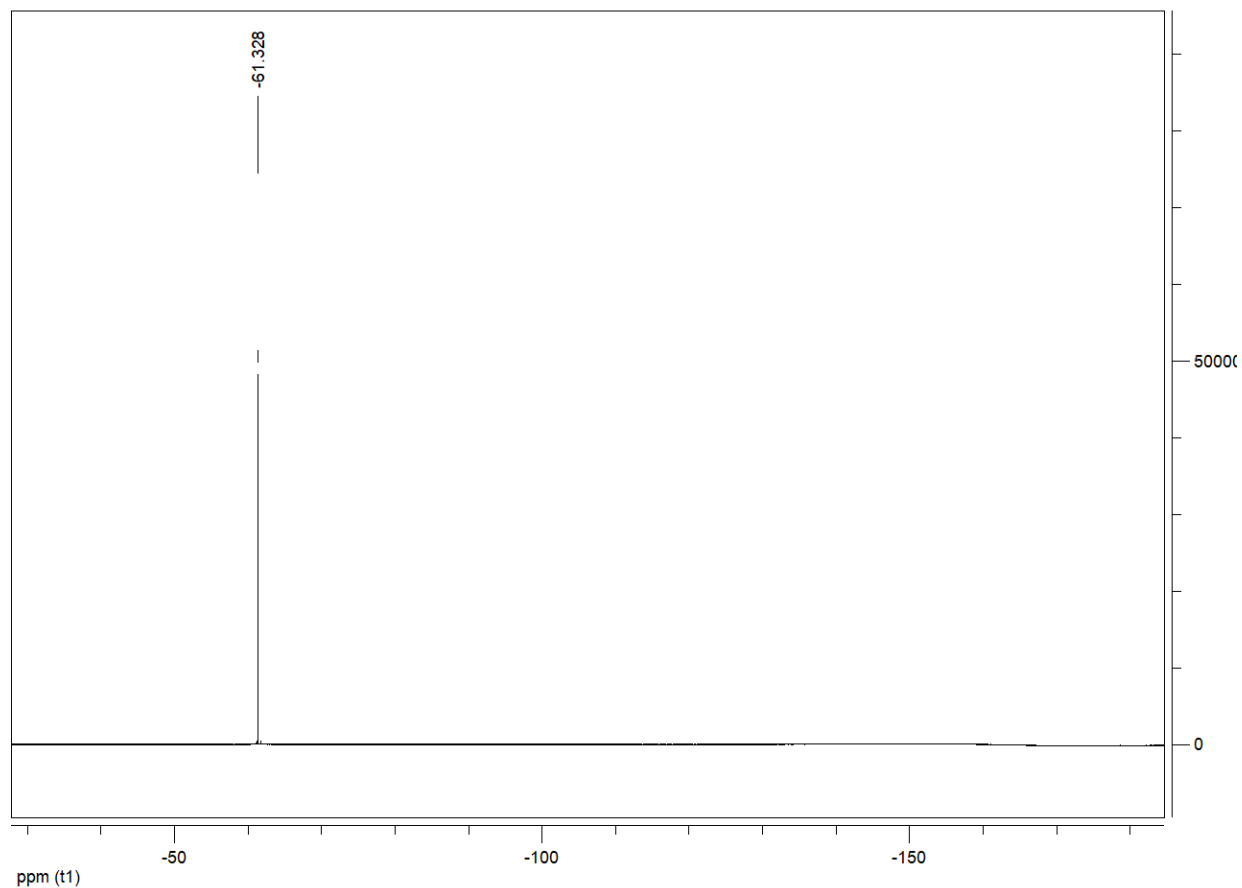

<sup>1</sup>H, <sup>13</sup>C and <sup>19</sup>F NMR spectra of compound 25 (DMSO-d<sub>6</sub>),  
**4-(4-(4-Methoxybenzoyl)piperazine-1-carbonyl)-N-(3-(4-methyl-1H-imidazol-1-yl)-5-(trifluoromethyl)-phenyl)benzamide**

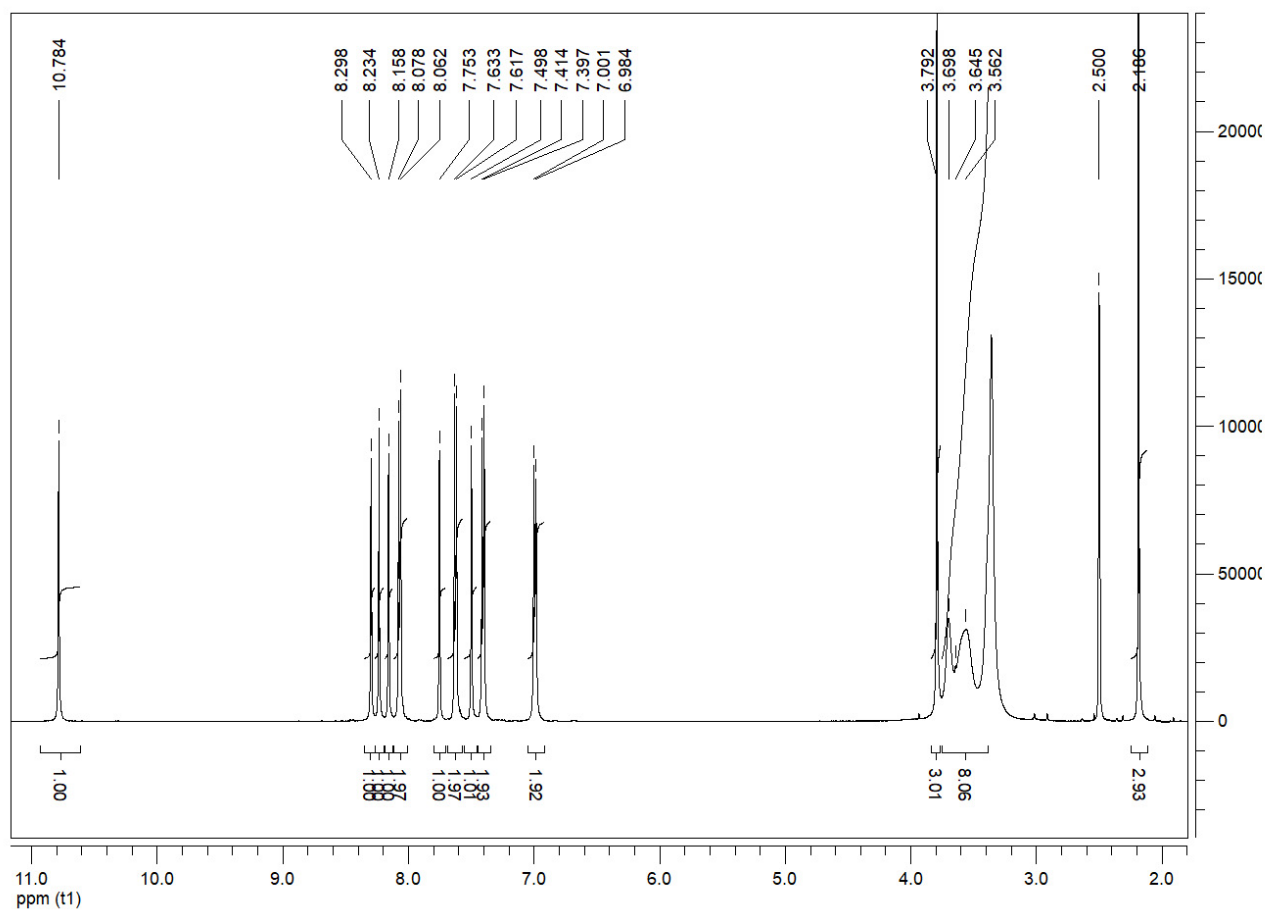

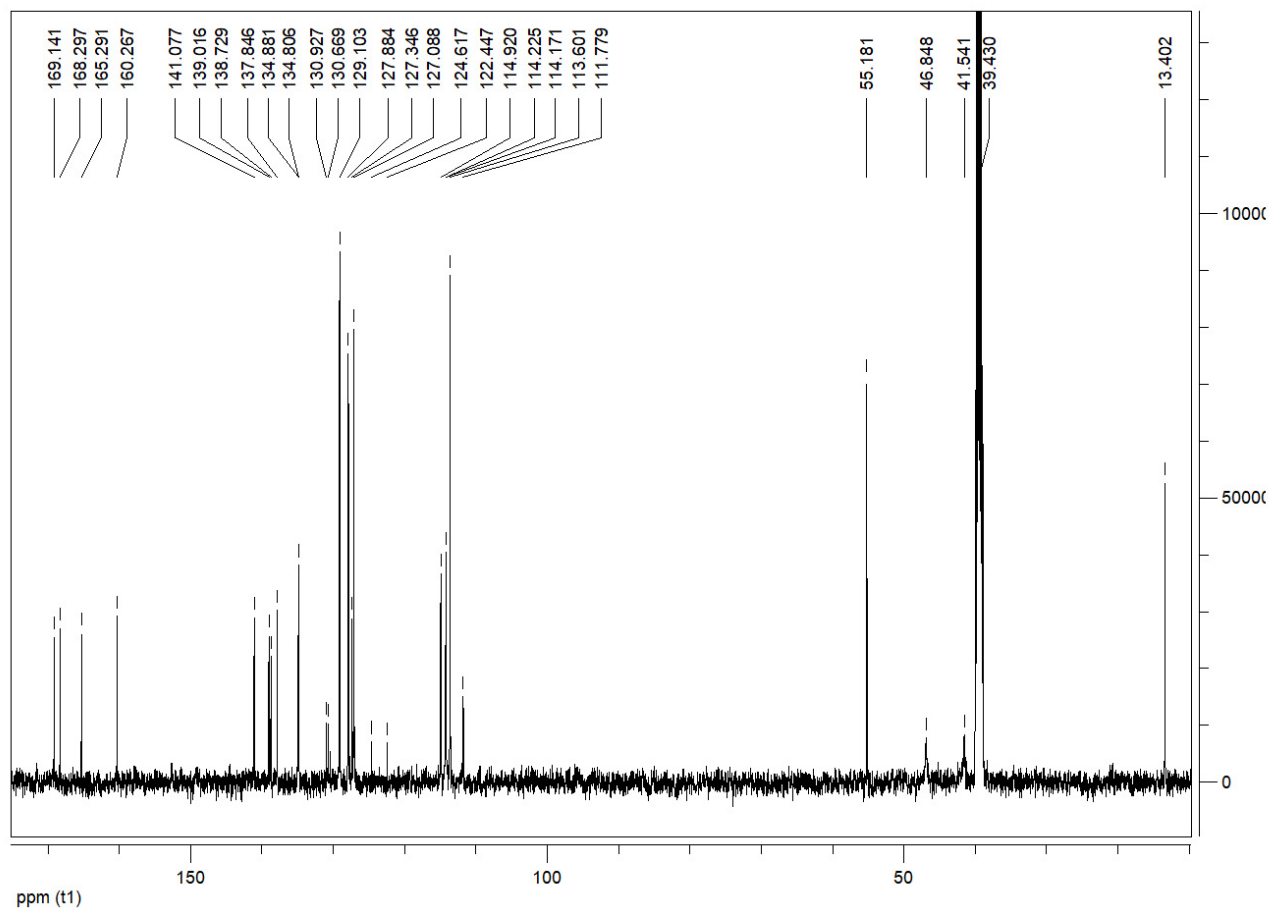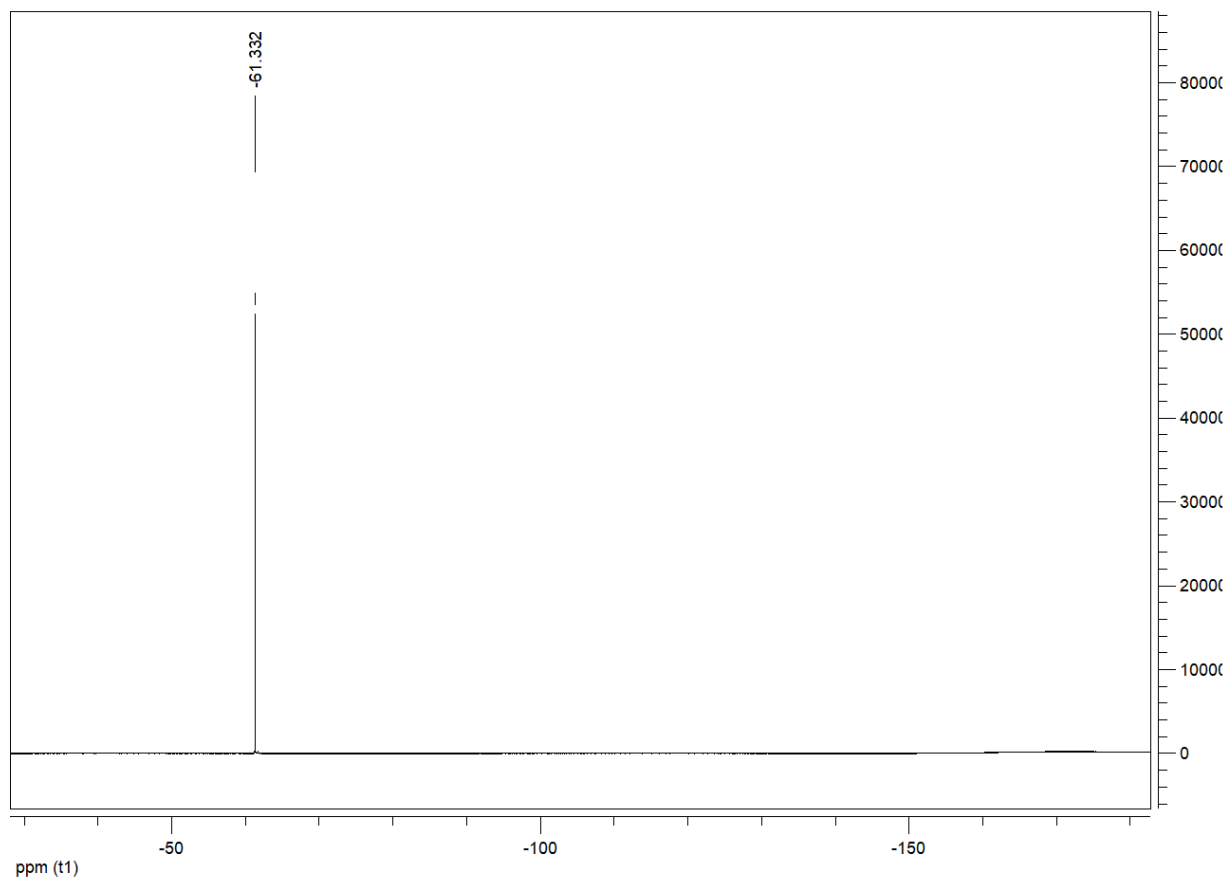

<sup>1</sup>H, <sup>13</sup>C and <sup>19</sup>F NMR spectra of compound 26 (DMSO-d<sub>6</sub>),  
**4-(4-(2-Fluorobenzoyl)piperazine-1-carbonyl)-N-(3-(4-methyl-1H-imidazol-1-yl)-5-(trifluoromethyl)phenyl)benzamide**

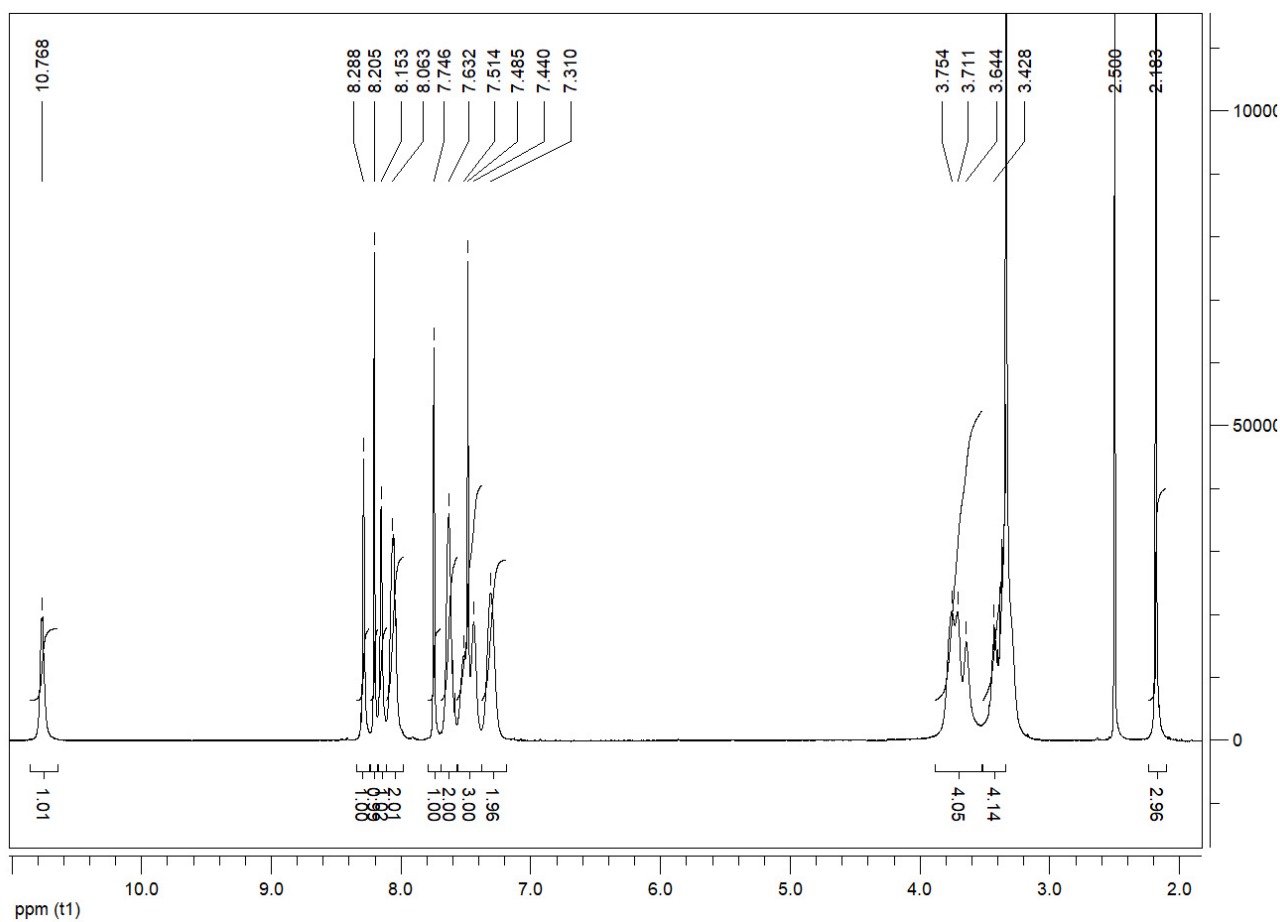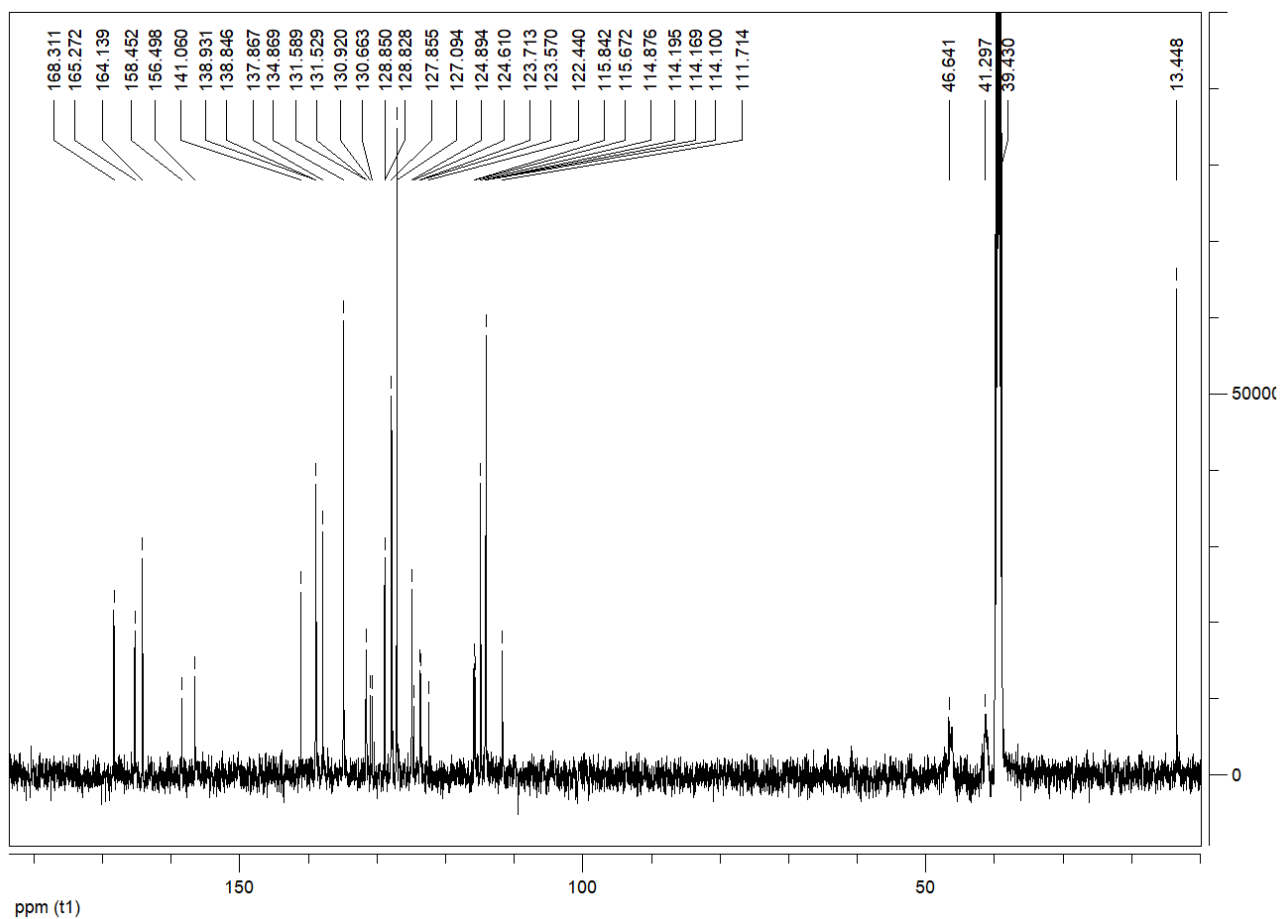

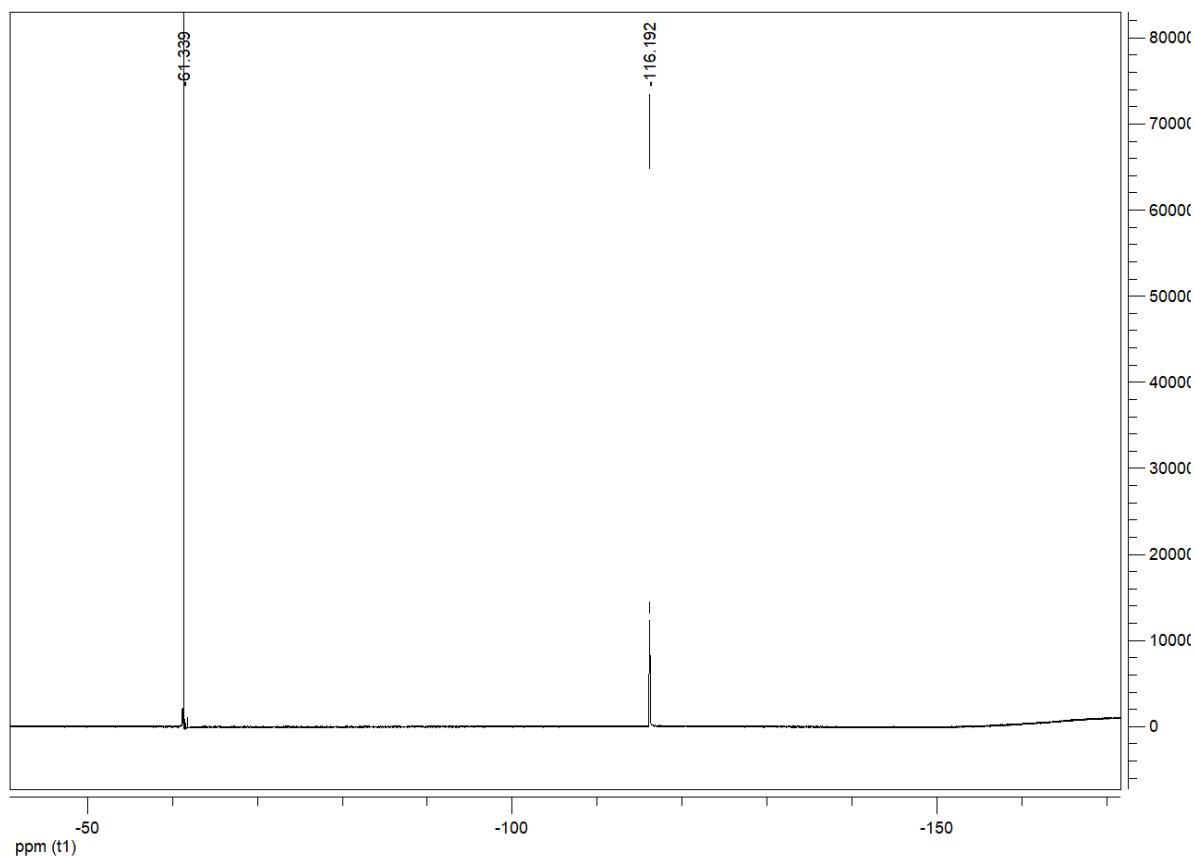

<sup>1</sup>H, <sup>13</sup>C and <sup>19</sup>F NMR spectra of compound 27 (DMSO-d<sub>6</sub>),  
**4-(4-(3-Fluorobenzoyl)piperazine-1-carbonyl)-N-(3-(4-methyl-1H-imidazol-1-yl)-5-(trifluoromethyl)phenyl)benzamide**

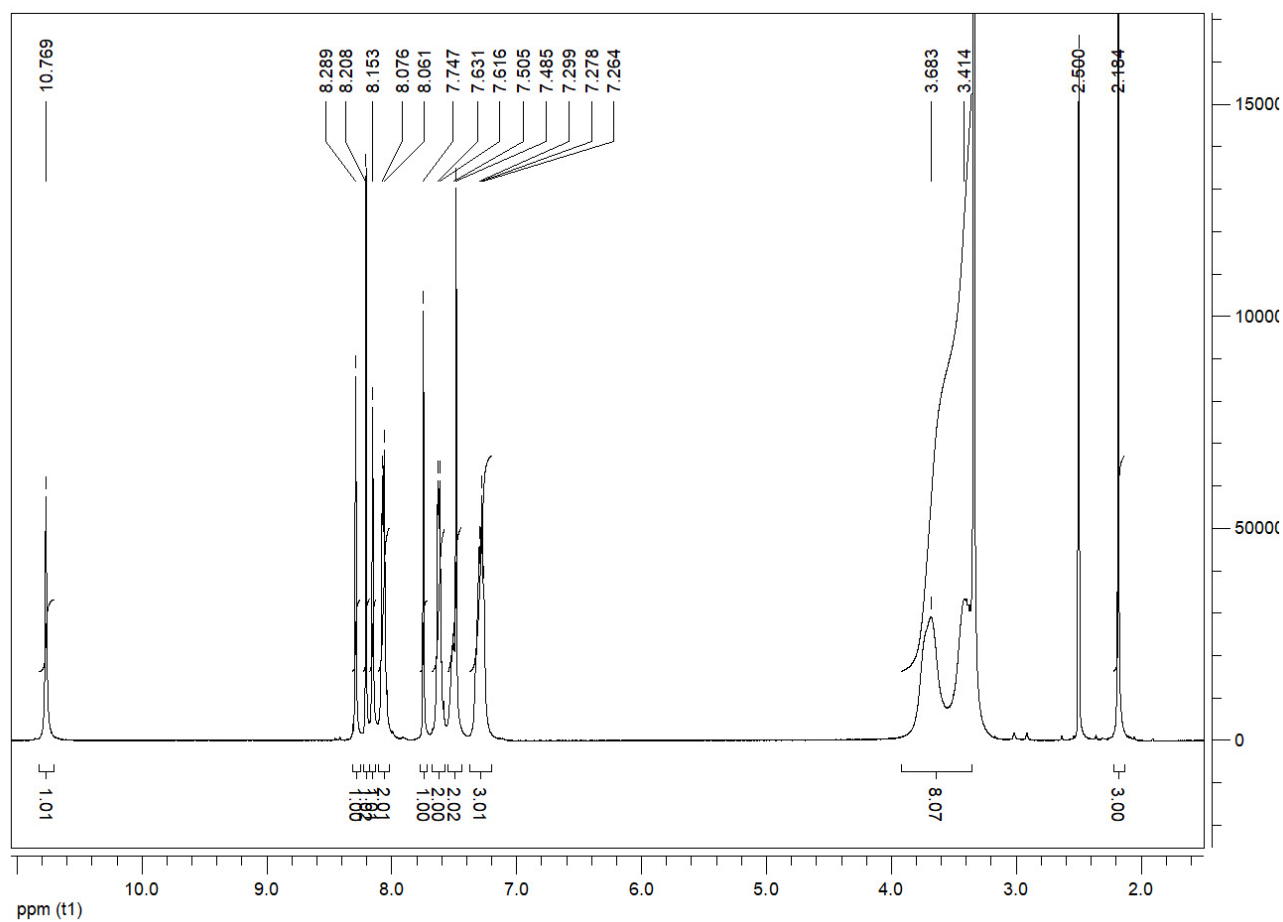



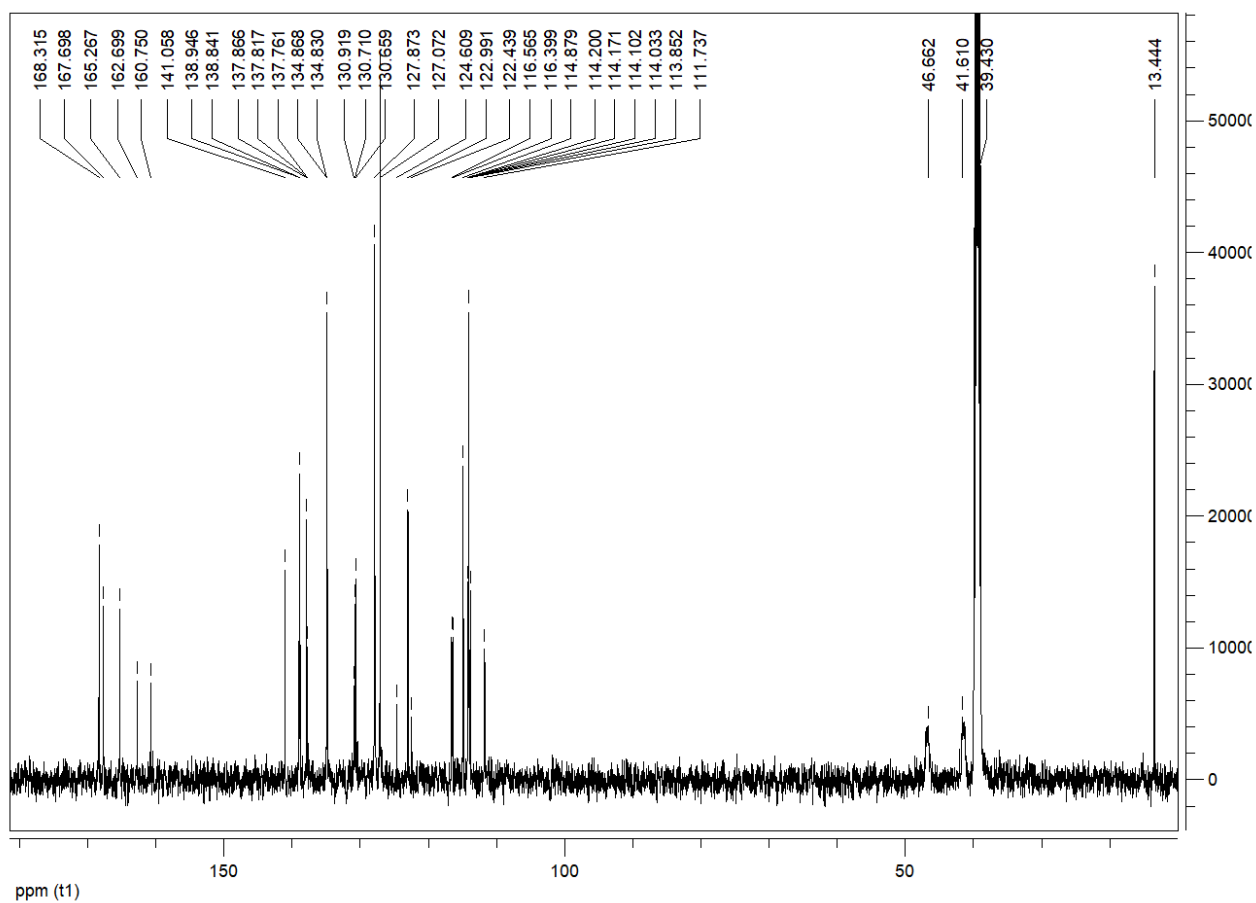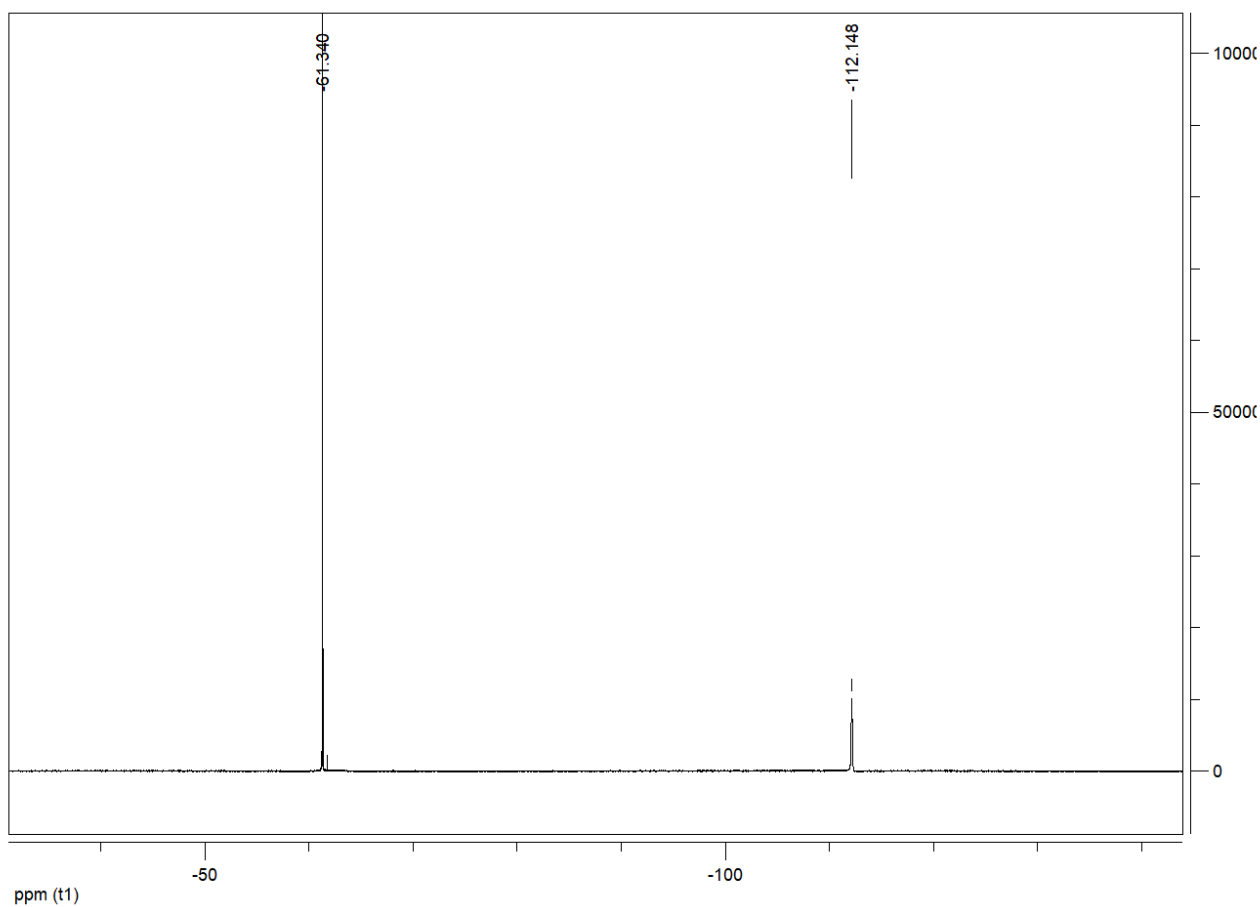

<sup>1</sup>H and <sup>13</sup>C NMR spectra of compound **28** (DMSO-d<sub>6</sub>),  
**N1-(2-methyl-5-nitrophenyl)-N4-(4-((2-(methylcarbamoyl)pyridin-4-yl)oxy)phenyl)terephthalamide**

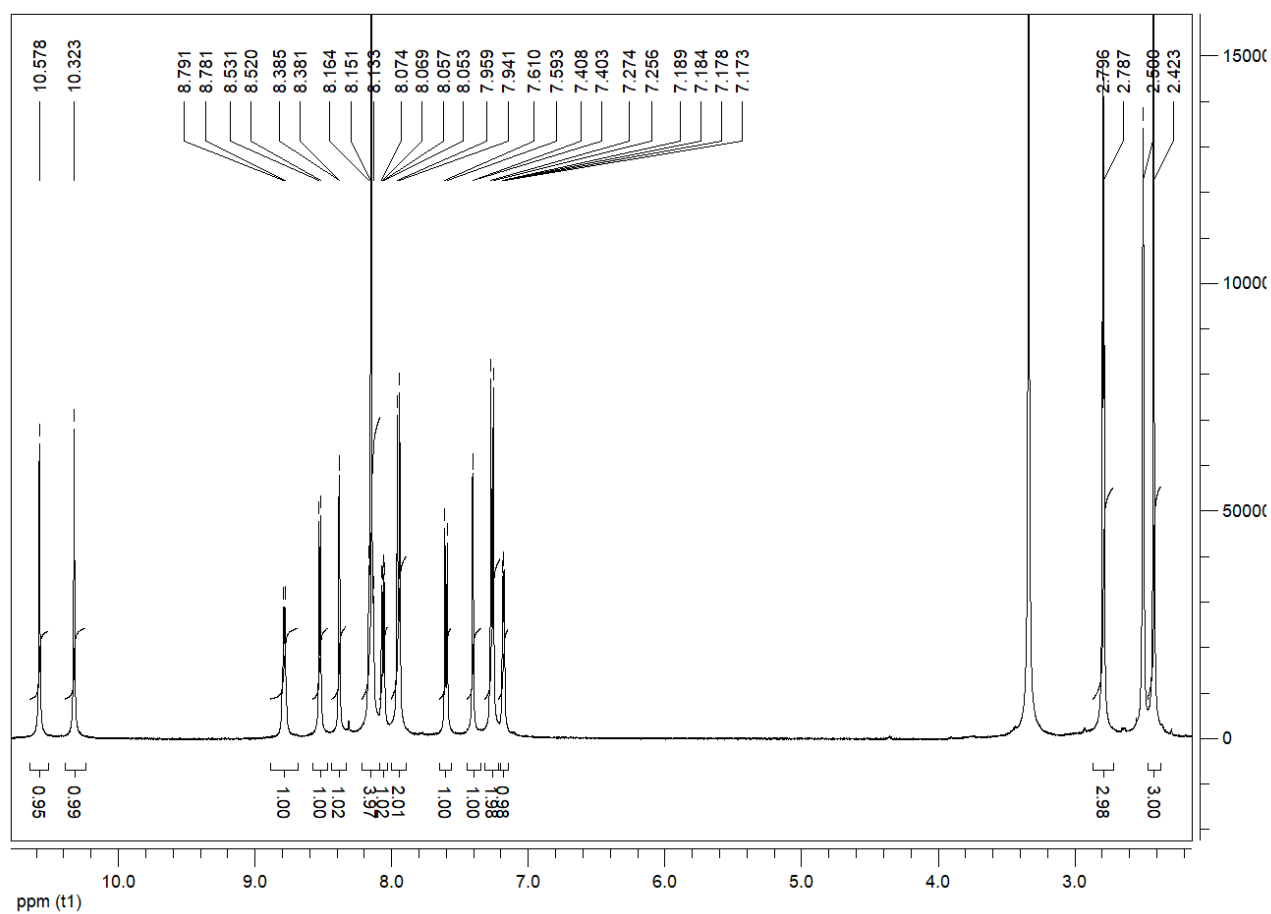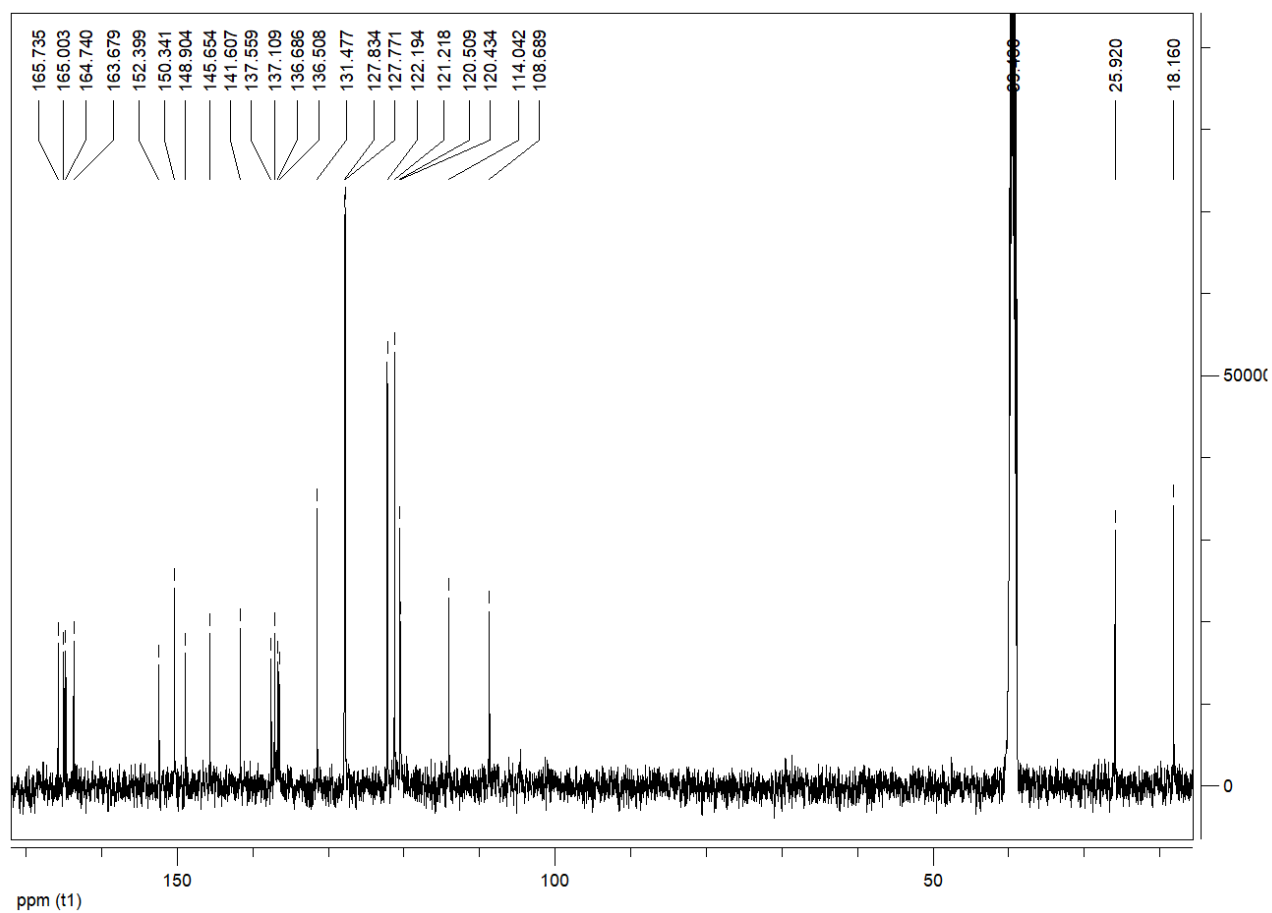

Supplement: s1 [file s1]
